# Supplementary material for: Soil Microbial Network Complexity Varies With pH as a Continuum, Not a Threshold, Across the North China Plain
Source: Front Microbiol. 2022 Jun 6;13:895687. doi: 10.3389/fmicb.2022.895687 (PMC9207804; doi:10.3389/fmicb.2022.895687)
Supplement: Supplementary file 5 [file Table_4.xlsx]

## Sheet: Table S1
Table S3. List of microbiota found in most abundance and ubiquitous bacterial and fungal communities in North China Plain.
ID	Taxa	Relative abundance (%)	Ubiquity	Correlation with Soil pH	Ecology cluster	Kindom	Phyla	Class	Order	Family	Genus	Species
1	F_OTU4167	0.963322	0.944444	0.303522	High pH	Fungi	Ascomycota	Dothideomycetes	Capnodiales	Davidiellaceae	Cladosporium	Cladosporium sp 4 MU_2012
2	B_OTU5543	0.0852288	1	0.453759	High pH	Bacteria	Actinobacteria	Actinobacteria	Actinomycetales	Nocardioidaceae
7	B_OTU6020	0.0405069	0.988889	0.522957	High pH	Bacteria	Acidobacteria	[Chloracidobacteria]	RB41
8	B_OTU3758	0.0148317	0.9	0.478616	High pH	Bacteria	Proteobacteria	Alphaproteobacteria	Rhodobacterales	Rhodobacteraceae
9	B_OTU7702	0.0479069	1	0.530844	High pH	Bacteria	Actinobacteria	Actinobacteria	Actinomycetales	Nocardioidaceae
10	B_OTU4841	0.028731	0.877778	0.460885	High pH	Bacteria	Planctomycetes	Phycisphaerae	WD2101
13	B_OTU7180	0.0389945	1	0.33594	High pH	Bacteria	Proteobacteria	Alphaproteobacteria	Rhizobiales	Hyphomicrobiaceae
14	B_OTU6846	0.0194647	0.966667	0.487593	High pH	Bacteria	Proteobacteria	Alphaproteobacteria	Rhizobiales	Hyphomicrobiaceae	Rhodoplanes
15	B_OTU4106	0.0659244	1	0.492257	High pH	Bacteria	Actinobacteria	Actinobacteria	Actinomycetales	Streptosporangiaceae	Nonomuraea
17	B_OTU6134	0.108426	1	0.618375	High pH	Bacteria	Proteobacteria	Gammaproteobacteria	Xanthomonadales	Sinobacteraceae
22	B_OTU4080	0.0899585	1	0.564399	High pH	Bacteria	Proteobacteria	Gammaproteobacteria	Thiotrichales	Piscirickettsiaceae
23	B_OTU5686	0.0481964	0.988889	0.546302	High pH	Bacteria	Gemmatimonadetes	Gemm-1
24	B_OTU56054	0.0347154	0.933333	0.501552	High pH	Bacteria	Proteobacteria	Alphaproteobacteria	Rhodospirillales
25	B_OTU6491	0.0513174	1	0.60412	High pH	Bacteria	Proteobacteria	Alphaproteobacteria	Rhodospirillales	Rhodospirillaceae
26	F_OTU2490	0.243299	0.988889	0.324608	High pH	Fungi	Ascomycota	Sordariomycetes	Hypocreales	Incertae sedis	Acremonium	Acremonium sp 64 OA_2013
27	B_OTU7117	0.0573982	1	0.572411	High pH	Bacteria	Proteobacteria	Alphaproteobacteria	Rhodospirillales
29	B_OTU10765	0.0256423	0.955556	0.550599	High pH	Bacteria	Acidobacteria	Acidobacteria-6	iii1-15	RB40
30	B_OTU2261	0.124578	1	0.647785	High pH	Bacteria	Acidobacteria	Acidobacteria-6	iii1-15
31	B_OTU11350	0.0449791	0.977778	0.560218	High pH	Bacteria	Actinobacteria	MB-A2-108	0319-7L14
32	B_OTU9838	0.0388659	1	0.615954	High pH	Bacteria	Proteobacteria	Deltaproteobacteria	[Entotheonellales]	[Entotheonellaceae]
36	F_OTU4603	0.184357	1	0.35466	High pH	Fungi	Ascomycota	Sordariomycetes	Hypocreales	Incertae sedis	Acremonium	Acremonium dichromosporum
37	B_OTU7792	0.195361	1	0.759343	High pH	Bacteria	Actinobacteria	Thermoleophilia	Gaiellales	Gaiellaceae
38	B_OTU57853	0.0257066	0.966667	0.412495	High pH	Bacteria	Gemmatimonadetes	Gemmatimonadetes
39	B_OTU7085	0.0377077	0.988889	0.332092	High pH	Bacteria	Actinobacteria	Actinobacteria	Actinomycetales	Microbacteriaceae	Microbacterium
40	B_OTU10	0.0293101	0.966667	0.404175	High pH	Bacteria	Acidobacteria	[Chloracidobacteria]	RB41	Ellin6075
41	F_OTU3729	0.115826	0.988889	0.356013	High pH	Fungi	Ascomycota	Sordariomycetes	Hypocreales	unidentified	unidentified	Hypocreales sp
45	B_OTU9889	0.0180812	0.911111	0.45706	High pH	Bacteria	Actinobacteria	Acidimicrobiia	Acidimicrobiales
46	B_OTU11101	0.112545	1	0.490461	High pH	Bacteria	Actinobacteria	Thermoleophilia	Solirubrobacterales
48	B_OTU4214	0.13423	1	0.590093	High pH	Bacteria	Actinobacteria	Thermoleophilia	Solirubrobacterales
52	B_OTU4276	0.289116	1	0.676731	High pH	Bacteria	Chloroflexi	Thermomicrobia	JG30-KF-CM45
53	B_OTU1606	0.0254492	0.966667	0.448924	High pH	Bacteria	Acidobacteria	[Chloracidobacteria]	RB41
57	B_OTU8219	0.0465555	0.966667	0.519945	High pH	Bacteria	Proteobacteria	Alphaproteobacteria	Rhodospirillales
61	B_OTU2336	0.10508	1	0.369935	High pH	Bacteria	Actinobacteria	Actinobacteria	Micrococcales
63	B_OTU6636	0.0198191	0.922222	0.603789	High pH	Bacteria	Acidobacteria	Acidobacteria-6	iii1-15	mb2424
65	B_OTU9104	0.0656993	1	0.549258	High pH	Bacteria	Proteobacteria	Alphaproteobacteria	Rhodospirillales
66	B_OTU6897	0.538014	1	0.308953	High pH	Bacteria	Actinobacteria	Actinobacteria	Actinomycetales	Micrococcaceae	Arthrobacter
67	F_OTU3334	0.0331388	0.855556	0.24843	High pH	Fungi	Ascomycota	Sordariomycetes	Hypocreales	Incertae sedis
69	B_OTU7874	0.161127	1	0.58145	High pH	Bacteria	Proteobacteria	Deltaproteobacteria	Syntrophobacterales	Syntrophobacteraceae
71	B_OTU5523	0.090055	1	0.727724	High pH	Bacteria	Acidobacteria	Acidobacteria-6	iii1-15
74	B_OTU69440	0.0399919	0.977778	0.513809	High pH	Bacteria	Proteobacteria	Alphaproteobacteria	Rhodospirillales
75	B_OTU2078	0.0105206	0.766667	0.419866	High pH	Bacteria	Actinobacteria	Actinobacteria	Actinomycetales	Nocardioidaceae
78	B_OTU1281	0.00875073	0.766667	0.52673	High pH	Bacteria	Acidobacteria	[Chloracidobacteria]	RB41
81	B_OTU7965	0.0704932	1	0.630923	High pH	Bacteria	Actinobacteria	Actinobacteria	Actinomycetales	Nocardioidaceae	Nocardioides
83	B_OTU7424	0.0219746	0.955556	0.58854	High pH	Bacteria	Actinobacteria	Thermoleophilia	Gaiellales	Gaiellaceae
87	B_OTU641	0.0333643	0.988889	0.63467	High pH	Bacteria	Acidobacteria	Acidobacteria-6	iii1-15
88	B_OTU10369	0.00649923	0.688889	0.389806	High pH	Bacteria	Proteobacteria	Alphaproteobacteria	Rhodobacterales	Rhodobacteraceae
90	B_OTU5513	0.017631	0.977778	0.570067	High pH	Bacteria	Acidobacteria	Acidobacteria-6	iii1-15	mb2424
91	B_OTU8935	0.0748045	1	0.694845	High pH	Bacteria	Actinobacteria	MB-A2-108	0319-7L14
93	B_OTU69532	0.0120969	0.744444	0.373902	High pH	Bacteria	Actinobacteria	MB-A2-108	0319-7L14
94	B_OTU2099	0.0100381	0.777778	0.631079	High pH	Bacteria	Acidobacteria	Acidobacteria-6	iii1-15
98	F_OTU4204	0.110646	0.988889	0.396039	High pH	Fungi	Ascomycota	Sordariomycetes	Hypocreales	Incertae sedis	Sarocladium	Sarocladium strictum
99	B_OTU5235	0.0533123	1	0.639936	High pH	Bacteria	Proteobacteria	Alphaproteobacteria	Rhizobiales	Hyphomicrobiaceae	Pedomicrobium
102	B_OTU4489	0.160323	1	0.671542	High pH	Bacteria	Actinobacteria	Thermoleophilia	Gaiellales	Gaiellaceae
104	B_OTU2322	0.0182741	0.955556	0.474565	High pH	Bacteria	Chloroflexi	Thermomicrobia	JG30-KF-CM45
105	B_OTU4462	0.0172126	0.9	0.601982	High pH	Bacteria	Proteobacteria	Alphaproteobacteria	Rhodospirillales
110	B_OTU4581	0.0430807	0.988889	0.779914	High pH	Bacteria	Chloroflexi	Thermomicrobia	JG30-KF-CM45
111	B_OTU6623	0.0549531	1	0.326938	High pH	Bacteria	Actinobacteria	Actinobacteria	Actinomycetales	Microbacteriaceae	Microbacterium
119	B_OTU6175	0.0456869	0.988889	0.352875	High pH	Bacteria	Actinobacteria	Actinobacteria	Actinomycetales	Streptomycetaceae	Streptomyces
120	B_OTU7571	0.0181779	0.911111	0.280474	High pH	Bacteria	Firmicutes	Bacilli	Bacillales	Alicyclobacillaceae	Alicyclobacillus
122	B_OTU5211	0.0150892	0.844444	0.652484	High pH	Bacteria	Nitrospirae	Nitrospira	Nitrospirales	0319-6A21
123	B_OTU3220	0.00839672	0.822222	0.475075	High pH	Bacteria	Proteobacteria	Alphaproteobacteria	Rhodobacterales	Rhodobacteraceae	Amaricoccus
124	B_OTU59223	0.00984501	0.788889	0.403088	High pH	Bacteria	Actinobacteria	MB-A2-108	0319-7L14
125	B_OTU4705	0.0351338	0.988889	0.573507	High pH	Bacteria	Nitrospirae	Nitrospira	Nitrospirales	0319-6A21
126	B_OTU2027	0.0560792	1	0.595382	High pH	Bacteria	Actinobacteria	Actinobacteria	Actinomycetales	Microbacteriaceae	Agromyces
129	B_OTU10271	0.0475852	1	0.506268	High pH	Bacteria	Chloroflexi	Chloroflexi	[Roseiflexales]
131	B_OTU7832	0.0885428	1	0.612005	High pH	Bacteria	Actinobacteria	Thermoleophilia	Solirubrobacterales	Solirubrobacteraceae
132	B_OTU10851	0.0296318	0.988889	0.601166	High pH	Bacteria	Acidobacteria	Acidobacteria-6	iii1-15	mb2424
133	F_OTU4508	0.0313049	0.988889	0.367349	High pH	Fungi	Ascomycota	Sordariomycetes	Hypocreales	Incertae sedis	Acremonium	Acremonium alternatum
136	B_OTU5703	0.0472634	1	0.622864	High pH	Bacteria	Proteobacteria	Alphaproteobacteria	Rhizobiales	Bradyrhizobiaceae	Balneimonas
139	B_OTU6238	0.063415	1	0.654167	High pH	Bacteria	Gemmatimonadetes	Gemmatimonadetes
141	B_OTU7355	0.0123864	0.911111	0.537367	High pH	Bacteria	Actinobacteria	Actinobacteria	Actinomycetales	Nocardioidaceae
142	B_OTU65197	0.0482931	1	0.697629	High pH	Bacteria	Proteobacteria	Alphaproteobacteria	Rhodospirillales
143	B_OTU53805	0.0428232	0.977778	0.461005	High pH	Bacteria	Actinobacteria	Thermoleophilia	Gaiellales	Gaiellaceae
145	B_OTU719	0.0238407	0.955556	0.446398	High pH	Bacteria	Actinobacteria	Thermoleophilia	Gaiellales	Gaiellaceae
146	B_OTU3122	0.0383511	0.977778	0.492401	High pH	Bacteria	Nitrospirae	Nitrospira	Nitrospirales	0319-6A21
147	B_OTU6884	0.0118077	0.911111	0.655844	High pH	Bacteria	Acidobacteria	Acidobacteria-6	iii1-15
148	B_OTU1946	0.0203015	0.922222	0.35316	High pH	Bacteria	Verrucomicrobia	[Pedosphaerae]	[Pedosphaerales]
151	B_OTU54139	0.00852556	0.833333	0.464605	High pH	Bacteria	Proteobacteria	Alphaproteobacteria	Rhodobacterales	Rhodobacteraceae
155	B_OTU4318	0.0741289	1	0.45199	High pH	Bacteria	Bacteroidetes	[Saprospirae]	[Saprospirales]	Chitinophagaceae
156	B_OTU7557	0.0528619	1	0.619885	High pH	Bacteria	Actinobacteria	Actinobacteria	Actinomycetales	Geodermatophilaceae
162	B_OTU2286	0.0256103	0.977778	0.66412	High pH	Bacteria	Acidobacteria	Acidobacteria-6	iii1-15
163	B_OTU7065	0.0448181	1	0.411243	High pH	Bacteria	Firmicutes	Bacilli	Bacillales
166	B_OTU3605	0.144493	1	0.82457	High pH	Bacteria	Acidobacteria	Acidobacteria-6	iii1-15
167	B_OTU4226	0.0148636	0.933333	0.476501	High pH	Bacteria	Proteobacteria	Alphaproteobacteria	Rhizobiales	Phyllobacteriaceae	Mesorhizobium
168	B_OTU11085	0.00646686	0.611111	0.43168	High pH	Bacteria	Acidobacteria	Acidobacteria-6	BPC015
170	B_OTU1910	0.0255137	0.988889	0.478078	High pH	Bacteria	Proteobacteria	Alphaproteobacteria	Rhizobiales	Phyllobacteriaceae
172	F_OTU3508	0.318394	0.977778	0.552739	High pH	Fungi	Ascomycota	Dothideomycetes	Pleosporales	Cucurbitariaceae	Pyrenochaetopsis	Pyrenochaetopsis leptospora
174	B_OTU1781	0.344037	1	0.533278	High pH	Bacteria	Actinobacteria	Actinobacteria	Actinomycetales	Geodermatophilaceae
175	B_OTU5476	0.085422	1	0.765371	High pH	Bacteria	Acidobacteria	Acidobacteria-6	iii1-15
176	B_OTU71649	0.0204942	0.955556	0.579849	High pH	Bacteria	Proteobacteria	Alphaproteobacteria	Rhodospirillales
177	B_OTU3059	0.0371608	1	0.662667	High pH	Bacteria	Proteobacteria	Deltaproteobacteria	Syntrophobacterales	Syntrophobacteraceae
179	B_OTU2570	0.0817219	1	0.658586	High pH	Bacteria	Actinobacteria	Rubrobacteria	Rubrobacterales	Rubrobacteraceae
180	B_OTU55231	0.0238727	0.977778	0.499806	High pH	Bacteria	Actinobacteria	Thermoleophilia	Gaiellales	Gaiellaceae
181	B_OTU4067	0.0177272	0.9	0.447332	High pH	Bacteria	Acidobacteria	[Chloracidobacteria]	RB41
182	B_OTU7434	0.0207838	0.911111	0.422724	High pH	Bacteria	Bacteroidetes	[Saprospirae]	[Saprospirales]	Chitinophagaceae
184	B_OTU4973	0.0425337	0.977778	0.528066	High pH	Bacteria	Actinobacteria	Actinobacteria	Actinomycetales	Promicromonosporaceae	Promicromonospora
185	B_OTU6803	0.0396384	1	0.674032	High pH	Bacteria	Proteobacteria	Alphaproteobacteria	Rhizobiales	Hyphomicrobiaceae	Hyphomicrobium
186	B_OTU2258	0.0656028	1	0.664508	High pH	Bacteria	Proteobacteria	Deltaproteobacteria	[Entotheonellales]	[Entotheonellaceae]
190	B_OTU4712	0.0806602	1	0.531883	High pH	Bacteria	Actinobacteria	Actinobacteria	Actinomycetales	Microbacteriaceae	Agromyces
191	B_OTU2164	0.0297285	0.988889	0.661964	High pH	Bacteria	Acidobacteria	Acidobacteria-6	iii1-15
194	B_OTU8884	0.0252886	0.977778	0.525891	High pH	Bacteria	Proteobacteria	Betaproteobacteria
195	B_OTU4311	0.0828159	1	0.564144	High pH	Bacteria	Proteobacteria	Gammaproteobacteria	Xanthomonadales	Sinobacteraceae	Steroidobacter
196	B_OTU1798	0.0495479	1	0.356074	High pH	Bacteria	Chloroflexi	TK10	AKYG885	Dolo
198	B_OTU64274	0.110421	0.988889	0.635096	High pH	Bacteria	Proteobacteria	Alphaproteobacteria	Rhodospirillales
199	B_OTU2582	0.0598435	0.977778	0.60545	High pH	Bacteria	Nitrospirae	Nitrospira	Nitrospirales	0319-6A21
200	F_OTU4129	0.235932	0.988889	0.263583	High pH	Fungi	Ascomycota	Sordariomycetes	Sordariales	Lasiosphaeriaceae	Podospora	Podospora sp
201	B_OTU7642	0.0219099	0.955556	0.562835	High pH	Bacteria	Nitrospirae	Nitrospira	Nitrospirales	Nitrospiraceae	Nitrospira
203	B_OTU6531	0.0140275	0.955556	0.558868	High pH	Bacteria	WS3	PRR-12	Sediment-1
207	B_OTU5140	0.0276693	0.955556	0.459184	High pH	Bacteria	Acidobacteria	[Chloracidobacteria]	RB41
208	B_OTU7551	0.0126437	0.922222	0.515336	High pH	Bacteria	Planctomycetes	Phycisphaerae	WD2101
209	B_OTU5979	0.045172	0.988889	0.348414	High pH	Bacteria	Actinobacteria	Actinobacteria	Actinomycetales	Promicromonosporaceae	Cellulosimicrobium
210	B_OTU7108	0.012258	0.844444	0.441277	High pH	Bacteria	Actinobacteria	Acidimicrobiia	Acidimicrobiales	C111
211	B_OTU4298	0.0579453	1	0.738986	High pH	Bacteria	Chloroflexi	Gitt-GS-136
212	B_OTU8043	0.0509314	1	0.423301	High pH	Bacteria	Acidobacteria	Acidobacteria-6	iii1-15
213	B_OTU7797	0.01599	0.922222	0.406091	High pH	Bacteria	Planctomycetes	Phycisphaerae	WD2101
216	B_OTU7753	0.324346	1	0.59738	High pH	Bacteria	Actinobacteria	Thermoleophilia	Solirubrobacterales	Solirubrobacteraceae
218	B_OTU57849	0.00971639	0.777778	0.497358	High pH	Bacteria	Acidobacteria	Acidobacteria-6	iii1-15
221	B_OTU5546	0.0542453	1	0.692399	High pH	Bacteria	Acidobacteria	Acidobacteria-6	iii1-15	mb2424
222	B_OTU5190	0.018596	0.966667	0.470416	High pH	Bacteria	Bacteroidetes	[Saprospirae]	[Saprospirales]	Chitinophagaceae
223	B_OTU5731	0.0454293	1	0.39152	High pH	Bacteria	Gemmatimonadetes	Gemm-1
225	B_OTU7586	0.0161188	0.944444	0.400426	High pH	Bacteria	Actinobacteria	Actinobacteria	Actinomycetales	Nocardioidaceae
226	B_OTU34357	0.0250307	0.955556	0.645003	High pH	Bacteria	Proteobacteria	Alphaproteobacteria	Rhodospirillales
227	B_OTU6033	0.00765708	0.733333	0.371785	High pH	Bacteria	Proteobacteria	Alphaproteobacteria	Rhodospirillales	Rhodospirillaceae
228	B_OTU7109	0.0151537	0.866667	0.503019	High pH	Bacteria	Actinobacteria	Acidimicrobiia	Acidimicrobiales	C111
229	B_OTU6282	0.0322058	1	0.413541	High pH	Bacteria	Actinobacteria	Thermoleophilia	Gaiellales	Gaiellaceae
230	B_OTU5010	0.0130619	0.888889	0.557913	High pH	Bacteria	Proteobacteria	Alphaproteobacteria	Rhizobiales	Hyphomicrobiaceae
232	B_OTU72425	0.0173088	0.966667	0.583423	High pH	Bacteria	Proteobacteria	Gammaproteobacteria	Xanthomonadales	Sinobacteraceae
233	F_OTU2693	0.166372	0.966667	0.342955	High pH	Fungi	Ascomycota	Dothideomycetes	Pleosporales	Cucurbitariaceae	Pyrenochaetopsis	Pyrenochaetopsis leptospora
234	B_OTU3654	0.0212023	0.933333	0.555887	High pH	Bacteria	Bacteroidetes	[Saprospirae]	[Saprospirales]	Chitinophagaceae
236	B_OTU828	0.0166334	0.966667	0.630125	High pH	Bacteria	Acidobacteria	Acidobacteria-6	iii1-15
237	B_OTU2154	0.0312731	1	0.512874	High pH	Bacteria	Actinobacteria	Thermoleophilia	Gaiellales	Gaiellaceae
240	B_OTU6078	0.0234543	0.955556	0.365775	High pH	Bacteria	Proteobacteria	Deltaproteobacteria	Myxococcales	Polyangiaceae	Sorangium	cellulosum
241	B_OTU7559	0.0332996	0.988889	0.434645	High pH	Bacteria	Bacteroidetes	[Saprospirae]	[Saprospirales]	Chitinophagaceae	Niabella
242	B_OTU6815	0.0922107	1	0.79694	High pH	Bacteria	Acidobacteria	Acidobacteria-6	iii1-15	mb2424
243	B_OTU3375	0.0093623	0.766667	0.33025	High pH	Bacteria	Acidobacteria	Acidobacteria-6	CCU21
244	B_OTU7334	0.0325919	1	0.74451	High pH	Bacteria	Proteobacteria	Alphaproteobacteria	Rhodospirillales
245	B_OTU2573	0.0190463	0.988889	0.484984	High pH	Bacteria	Actinobacteria	Thermoleophilia	Solirubrobacterales
246	B_OTU5434	0.0379971	1	0.394362	High pH	Bacteria	Nitrospirae	Nitrospira	Nitrospirales	Nitrospiraceae	Nitrospira
247	B_OTU9714	0.0155718	0.877778	0.513241	High pH	Bacteria	Nitrospirae	Nitrospira	Nitrospirales	0319-6A21
250	B_OTU9631	0.00627313	0.8	0.566744	High pH	Bacteria	Acidobacteria	Acidobacteria-6	iii1-15
251	B_OTU10683	0.0111314	0.877778	0.450717	High pH	Bacteria	Gemmatimonadetes	Gemmatimonadetes	KD8-87
252	B_OTU8099	0.0173413	0.966667	0.702998	High pH	Bacteria	Actinobacteria	Thermoleophilia	Solirubrobacterales
254	B_OTU61769	0.00852612	0.6	0.326552	High pH	Bacteria	Planctomycetes	Phycisphaerae	WD2101
257	B_OTU55565	0.0156357	0.911111	0.673357	High pH	Bacteria	Acidobacteria	Acidobacteria-6	iii1-15
260	B_OTU2105	0.00566262	0.722222	0.409659	High pH	Bacteria	Proteobacteria	Alphaproteobacteria	Rhodobacterales	Rhodobacteraceae	Amaricoccus
262	B_OTU3292	0.0298895	1	0.673956	High pH	Bacteria	Chloroflexi	Thermomicrobia	AKYG1722
263	B_OTU9150	0.0173412	0.977778	0.569145	High pH	Bacteria	Acidobacteria	iii1-8	DS-18
264	B_OTU5428	0.01525	0.9	0.354192	High pH	Bacteria	Acidobacteria	[Chloracidobacteria]	44524
265	B_OTU4203	0.0140914	0.9	0.391488	High pH	Bacteria	Chloroflexi	Chloroflexi	[Roseiflexales]	[Kouleothrixaceae]
267	B_OTU9299	0.0132871	0.933333	0.394467	High pH	Bacteria	Actinobacteria	Actinobacteria	Actinomycetales	Sporichthyaceae
268	B_OTU5071	0.0147674	0.922222	0.519528	High pH	Bacteria	Proteobacteria	Alphaproteobacteria	Rhizobiales	Hyphomicrobiaceae	Pedomicrobium
269	B_OTU63154	0.00788242	0.633333	0.411259	High pH	Bacteria	Chloroflexi	Gitt-GS-136
272	B_OTU67187	0.00862277	0.733333	0.378424	High pH	Bacteria	Gemmatimonadetes
274	B_OTU6571	0.0329782	1	0.570303	High pH	Bacteria	Acidobacteria	Acidobacteria-5
277	B_OTU55851	0.0119038	0.755556	0.536774	High pH	Bacteria	Proteobacteria	Alphaproteobacteria	Rhodospirillales
278	B_OTU2313	0.0605836	1	0.304074	High pH	Bacteria	Proteobacteria	Alphaproteobacteria	Sphingomonadales	Sphingomonadaceae	Kaistobacter
279	B_OTU2093	0.0568193	1	0.718721	High pH	Bacteria	Proteobacteria	Deltaproteobacteria	NB1-j	NB1-i
283	B_OTU1999	0.0384154	0.977778	0.416047	High pH	Bacteria	Gemmatimonadetes	Gemmatimonadetes
284	B_OTU4853	0.0155396	0.955556	0.686864	High pH	Bacteria	Nitrospirae	Nitrospira	Nitrospirales	0319-6A21
285	B_OTU5528	0.021524	0.966667	0.583114	High pH	Bacteria	Actinobacteria	Acidimicrobiia	Acidimicrobiales	Iamiaceae	Iamia
286	F_OTU2465	0.11766	1	0.261567	High pH	Fungi	Ascomycota	Sordariomycetes	Hypocreales	Incertae sedis	Acremonium	Acremonium sp 64 OA_2013
287	B_OTU10007	0.0323025	0.988889	0.51587	High pH	Bacteria	Proteobacteria	Alphaproteobacteria	Rhodospirillales	Rhodospirillaceae
289	B_OTU9092	0.0174697	0.955556	0.672239	High pH	Bacteria	Gemmatimonadetes	Gemm-5
291	B_OTU56579	0.0122582	0.744444	0.322662	High pH	Bacteria	Proteobacteria	Alphaproteobacteria	Rhodospirillales
292	B_OTU7712	0.063061	0.988889	0.52513	High pH	Bacteria	Actinobacteria	Actinobacteria	Actinomycetales	Nocardioidaceae	Nocardioides
293	B_OTU6968	0.040346	1	0.653888	High pH	Bacteria	Proteobacteria	Alphaproteobacteria	Rhizobiales	Bradyrhizobiaceae	Balneimonas
297	B_OTU6202	0.0363886	1	0.620987	High pH	Bacteria	Acidobacteria	Acidobacteria-6	iii1-15	RB40
302	B_OTU9823	0.023197	1	0.546503	High pH	Bacteria	Actinobacteria	Thermoleophilia	Gaiellales	Gaiellaceae
303	B_OTU1861	0.00736738	0.744444	0.352952	High pH	Bacteria	Gemmatimonadetes	Gemm-5
304	B_OTU6297	0.0668575	1	0.444089	High pH	Bacteria	Actinobacteria	Acidimicrobiia	Acidimicrobiales	AKIW874
305	B_OTU7533	0.0257389	1	0.661436	High pH	Bacteria	Actinobacteria	Thermoleophilia	Solirubrobacterales
306	B_OTU10721	0.0329459	0.966667	0.556181	High pH	Bacteria	Nitrospirae	Nitrospira	Nitrospirales	0319-6A21
307	B_OTU5481	0.0299858	0.977778	0.597638	High pH	Bacteria	Acidobacteria	Acidobacteria-6	CCU21
308	B_OTU8709	0.0306293	0.966667	0.528253	High pH	Bacteria	Chloroflexi	Thermomicrobia	JG30-KF-CM45
309	B_OTU54386	0.00543693	0.755556	0.572414	High pH	Bacteria	Proteobacteria	Betaproteobacteria	MND1
311	B_OTU1102	0.0134161	0.9	0.58203	High pH	Bacteria	Planctomycetes	Planctomycetia	Pirellulales	Pirellulaceae
312	B_OTU5897	0.0149928	0.9	0.264242	High pH	Bacteria	Proteobacteria	Gammaproteobacteria	Xanthomonadales	Xanthomonadaceae	Luteimonas
313	B_OTU2709	0.0130299	0.822222	0.398322	High pH	Bacteria	Actinobacteria	Actinobacteria	Actinomycetales	Micrococcaceae
315	B_OTU3389	0.0770889	1	0.751297	High pH	Bacteria	Acidobacteria	Acidobacteria-6	iii1-15
317	B_OTU1250	0.00646672	0.755556	0.508371	High pH	Bacteria	Planctomycetes	Pla3
323	B_OTU2430	0.0110354	0.822222	0.644778	High pH	Bacteria	Acidobacteria	Acidobacteria-6	iii1-15
324	B_OTU9941	0.00965188	0.866667	0.480659	High pH	Bacteria	Actinobacteria	Acidimicrobiia	Acidimicrobiales
328	B_OTU2002	0.00743163	0.755556	0.431491	High pH	Bacteria	Planctomycetes	Phycisphaerae	WD2101
331	B_OTU4123	0.0254816	0.988889	0.52289	High pH	Bacteria	Acidobacteria	Acidobacteria-6	iii1-15
332	B_OTU72876	0.00489029	0.644444	0.455863	High pH	Bacteria	Chloroflexi	Ktedonobacteria	TK10
333	B_OTU8126	0.0351338	1	0.466703	High pH	Bacteria	Actinobacteria	Thermoleophilia	Gaiellales	Gaiellaceae
334	B_OTU7675	0.0151211	0.944444	0.675112	High pH	Bacteria	Proteobacteria	Alphaproteobacteria	Rhodospirillales
337	F_OTU2226	0.0549207	0.933333	0.226909	High pH	Fungi	Ascomycota	Sordariomycetes	Sordariales	Lasiosphaeriaceae	Podospora	Podospora dimorpha
339	B_OTU7473	0.134809	1	0.578024	High pH	Bacteria	Actinobacteria	Thermoleophilia	Solirubrobacterales	Solirubrobacteraceae
341	B_OTU8271	0.277372	1	0.319237	High pH	Bacteria	Acidobacteria	[Chloracidobacteria]	RB41
342	F_OTU2685	0.0412788	0.988889	0.242344	High pH	Fungi	Ascomycota	Sordariomycetes	Hypocreales	Incertae sedis	unidentified	Hypocreales sp
343	B_OTU2005	0.274026	1	0.744467	High pH	Bacteria	Chloroflexi	Anaerolineae	envOPS12
347	B_OTU7662	0.0601332	1	0.3075	High pH	Bacteria	Proteobacteria	Alphaproteobacteria	Sphingomonadales	Sphingomonadaceae	Kaistobacter
348	B_OTU10182	0.0609697	0.988889	0.701221	High pH	Bacteria	Proteobacteria	Alphaproteobacteria	Rhodospirillales
351	B_OTU4376	0.0373216	0.988889	0.39166	High pH	Bacteria	Actinobacteria	MB-A2-108	0319-7L14
352	B_OTU4375	0.00801115	0.788889	0.449062	High pH	Bacteria	Planctomycetes	Phycisphaerae	WD2101
359	B_OTU8352	0.0100703	0.666667	0.360309	High pH	Bacteria	Proteobacteria	Alphaproteobacteria	Rhodospirillales	Rhodospirillaceae
363	F_OTU2340	0.144107	0.922222	0.367832	High pH	Fungi	Ascomycota	Sordariomycetes
364	B_OTU64782	0.0122258	0.711111	0.249611	High pH	Bacteria	Acidobacteria	[Chloracidobacteria]	RB41
366	B_OTU3242	0.0233901	0.966667	0.737464	High pH	Bacteria	Acidobacteria	Acidobacteria-6	iii1-15
367	B_OTU11165	0.0207196	0.944444	0.601739	High pH	Bacteria	Proteobacteria	Alphaproteobacteria	Rhodospirillales
370	B_OTU10659	0.0198831	0.988889	0.57989	High pH	Bacteria	Acidobacteria	Acidobacteria-6	CCU21
371	F_OTU4507	0.523471	0.933333	0.397275	High pH	Fungi	Ascomycota	Sordariomycetes	Sordariales	Lasiosphaeriaceae
372	B_OTU1631	0.0548888	1	0.714029	High pH	Bacteria	Proteobacteria	Alphaproteobacteria	Rhodospirillales	Rhodospirillaceae	Skermanella
374	B_OTU4068	0.0234223	1	0.501817	High pH	Bacteria	Acidobacteria	PAUC37f
378	B_OTU53404	0.0150251	0.744444	0.467023	High pH	Bacteria	Proteobacteria	Alphaproteobacteria	Rhodospirillales
381	B_OTU3664	0.018435	0.988889	0.420598	High pH	Bacteria	Proteobacteria	Alphaproteobacteria	Rhizobiales	Bradyrhizobiaceae
382	B_OTU4518	0.0679191	1	0.27738	High pH	Bacteria	Proteobacteria	Deltaproteobacteria	[Entotheonellales]	[Entotheonellaceae]
383	B_OTU3454	0.0225214	0.844444	0.316599	High pH	Bacteria	Actinobacteria	Actinobacteria	Actinomycetales	Propionibacteriaceae	Microlunatus
385	F_OTU3851	0.0144458	0.744444	0.270407	High pH	Fungi	Ascomycota	Dothideomycetes	Pleosporales
390	B_OTU56262	0.0122256	0.888889	0.581168	High pH	Bacteria	Acidobacteria	Acidobacteria-6	iii1-15
391	B_OTU10052	0.009845	0.688889	0.46449	High pH	Bacteria	Proteobacteria	Alphaproteobacteria	Rhodospirillales
396	B_OTU262	0.0141237	0.922222	0.482417	High pH	Bacteria	Actinobacteria	Actinobacteria	Actinomycetales	Micromonosporaceae	Catellatospora
397	B_OTU6649	0.0138666	0.933333	0.393076	High pH	Bacteria	Acidobacteria	Acidobacteria-6	iii1-15
398	F_OTU3865	0.0649592	0.988889	0.261353	High pH	Fungi	Ascomycota	Sordariomycetes
402	B_OTU53820	0.00932999	0.844444	0.521678	High pH	Bacteria	Proteobacteria	Alphaproteobacteria	Rhodospirillales
404	B_OTU7419	0.0148958	0.933333	0.407861	High pH	Bacteria	Acidobacteria	Acidobacteria-6	iii1-15	mb2424
405	B_OTU8109	0.0188859	0.966667	0.380523	High pH	Bacteria	Verrucomicrobia	Opitutae	Opitutales	Opitutaceae	Opitutus
406	B_OTU2610	0.0409575	0.988889	0.440272	High pH	Bacteria	Actinobacteria	Thermoleophilia	Gaiellales	Gaiellaceae
408	B_OTU2558	0.00685251	0.822222	0.598826	High pH	Bacteria	Acidobacteria	Acidobacteria-6	iii1-15	mb2424
410	B_OTU2202	0.00788194	0.788889	0.387499	High pH	Bacteria	Proteobacteria	Alphaproteobacteria	Rhizobiales	Rhizobiaceae	Agrobacterium
412	B_OTU4078	0.0109062	0.9	0.506367	High pH	Bacteria	Proteobacteria	Alphaproteobacteria	Rhizobiales	Hyphomicrobiaceae	Hyphomicrobium
414	B_OTU7351	0.0225538	0.988889	0.46152	High pH	Bacteria	Proteobacteria	Alphaproteobacteria	Rhizobiales	Hyphomicrobiaceae	Hyphomicrobium
416	B_OTU6149	0.0136412	0.933333	0.572048	High pH	Bacteria	Acidobacteria	Acidobacteria-6	CCU21
417	B_OTU6486	0.0459443	1	0.53663	High pH	Bacteria	Bacteroidetes	Cytophagia	Cytophagales	Cytophagaceae
420	B_OTU4872	0.0173413	0.877778	0.454182	High pH	Bacteria	Bacteroidetes	Cytophagia	Cytophagales	Cytophagaceae
425	B_OTU4640	0.00936196	0.866667	0.57454	High pH	Bacteria	Acidobacteria	Acidobacteria-6	iii1-15	mb2424
427	B_OTU2487	0.00826862	0.811111	0.441866	High pH	Bacteria	Actinobacteria	MB-A2-108	0319-7L14
428	B_OTU385	0.0131908	0.844444	0.246412	High pH	Bacteria	Actinobacteria	Actinobacteria	Actinomycetales	Nocardioidaceae
430	B_OTU4591	0.0184355	0.977778	0.603794	High pH	Bacteria	Acidobacteria	Acidobacteria-6	iii1-15
431	B_OTU6526	0.0200117	0.955556	0.442985	High pH	Bacteria	Actinobacteria	Actinobacteria	Actinomycetales	Intrasporangiaceae	Phycicoccus
432	B_OTU65010	0.012161	0.888889	0.409313	High pH	Bacteria	Proteobacteria	Alphaproteobacteria	Rhizobiales	Hyphomicrobiaceae	Rhodoplanes
433	B_OTU2239	0.00691668	0.833333	0.4599	High pH	Bacteria	Actinobacteria	Rubrobacteria	Rubrobacterales	Rubrobacteraceae
434	B_OTU61872	0.0166975	0.966667	0.585635	High pH	Bacteria	Gemmatimonadetes	Gemm-1
436	B_OTU8591	0.136064	1	0.500894	High pH	Bacteria	Actinobacteria	Thermoleophilia	Gaiellales	Gaiellaceae
438	B_OTU2940	0.0263498	0.977778	0.231669	High pH	Bacteria	Proteobacteria	Alphaproteobacteria	Rhizobiales	Rhizobiaceae	Agrobacterium
440	B_OTU6415	0.00923352	0.866667	0.574155	High pH	Bacteria	Proteobacteria	Deltaproteobacteria	NB1-j
441	B_OTU4648	0.0126116	0.877778	0.388191	High pH	Bacteria	Acidobacteria	Sva0725	Sva0725
443	F_OTU4189	0.321386	0.922222	0.313104	High pH	Fungi	Ascomycota	Dothideomycetes	Pleosporales	Cucurbitariaceae	Pyrenochaetopsis	Pyrenochaetopsis leptospora
445	B_OTU59845	0.0132554	0.922222	0.432687	High pH	Bacteria	Gemmatimonadetes
446	B_OTU57794	0.00550168	0.711111	0.35833	High pH	Bacteria	Chloroflexi	Chloroflexi	AKIW781
448	B_OTU5805	0.125189	1	0.33352	High pH	Bacteria	Actinobacteria	MB-A2-108	0319-7L14
450	B_OTU7107	0.0746437	1	0.686185	High pH	Bacteria	Acidobacteria	Acidobacteria-6	iii1-15	RB40
452	B_OTU5219	0.0488723	1	0.483366	High pH	Bacteria	Proteobacteria	Betaproteobacteria	Ellin6067
456	B_OTU337	0.0136739	0.822222	0.711726	High pH	Bacteria	Acidobacteria	Acidobacteria-6	iii1-15
458	B_OTU6655	0.112866	1	0.779677	High pH	Bacteria	Acidobacteria	Acidobacteria-6	iii1-15
459	B_OTU3920	0.00878279	0.888889	0.497827	High pH	Bacteria	Planctomycetes	Planctomycetia	Pirellulales	Pirellulaceae
460	B_OTU6691	0.00994111	0.877778	0.537856	High pH	Bacteria	Acidobacteria	S035
463	F_OTU2858	0.0143494	0.622222	0.258985	High pH	Fungi	Ascomycota	Sordariomycetes	Sordariales	Chaetomiaceae	Chaetomium
464	B_OTU3725	0.0129653	0.933333	0.468311	High pH	Bacteria	Proteobacteria	Gammaproteobacteria	Xanthomonadales	Sinobacteraceae	Steroidobacter
465	F_OTU2476	0.0128692	0.633333	0.245229	High pH	Fungi	Ascomycota	Sordariomycetes	Hypocreales	Incertae sedis	Acremonium	Acremonium sp R8_9
467	B_OTU69051	0.0090732	0.711111	0.409242	High pH	Bacteria	Planctomycetes	Phycisphaerae	WD2101
468	B_OTU8720	0.0336538	0.988889	0.49747	High pH	Bacteria	Proteobacteria	Alphaproteobacteria	Sphingomonadales	Sphingomonadaceae	Kaistobacter
469	F_OTU4007	0.624755	0.988889	0.340626	High pH	Fungi	Ascomycota	Dothideomycetes	Pleosporales	Pleosporaceae	Alternaria	Alternaria sp 3 MU_2012
470	F_OTU3262	0.06438	0.677778	0.289833	High pH	Fungi	Ascomycota	Sordariomycetes	Sordariales	Lasiosphaeriaceae
471	F_OTU4150	0.786107	0.977778	0.365778	High pH	Fungi	Ascomycota	Sordariomycetes	Hypocreales	Nectriaceae	Fusarium
472	B_OTU3636	0.0233256	0.988889	0.422728	High pH	Bacteria	Acidobacteria	iii1-8	DS-18
474	B_OTU2782	0.0107134	0.877778	0.526223	High pH	Bacteria	Acidobacteria	iii1-8	DS-18
476	B_OTU68096	0.00765715	0.777778	0.437185	High pH	Bacteria	Chloroflexi	TK10	B07
477	B_OTU2223	0.00643417	0.7	0.332613	High pH	Bacteria	Verrucomicrobia	[Pedosphaerae]	[Pedosphaerales]	Ellin517
478	B_OTU7253	0.0103276	0.744444	0.273512	High pH	Bacteria	Bacteroidetes	[Saprospirae]	[Saprospirales]	Chitinophagaceae	Flavisolibacter
479	B_OTU57375	0.00871829	0.833333	0.589957	High pH	Bacteria	Nitrospirae	Nitrospira	Nitrospirales	0319-6A21
482	B_OTU60507	0.00395706	0.622222	0.503903	High pH	Bacteria	Planctomycetes	Phycisphaerae	mle1-8
486	B_OTU6711	0.00817174	0.866667	0.477922	High pH	Bacteria	Acidobacteria	[Chloracidobacteria]	RB41	Ellin6075
487	B_OTU8058	0.0213634	0.977778	0.569879	High pH	Bacteria	Proteobacteria	Deltaproteobacteria	Syntrophobacterales	Syntrophobacteraceae
493	B_OTU4706	0.00794662	0.811111	0.346186	High pH	Bacteria	Verrucomicrobia	[Pedosphaerae]	[Pedosphaerales]	Ellin517
494	B_OTU10500	0.00746414	0.722222	0.344915	High pH	Bacteria	Gemmatimonadetes	Gemmatimonadetes	Gemmatimonadales
497	B_OTU68173	0.00614494	0.733333	0.437272	High pH	Bacteria	Proteobacteria	Alphaproteobacteria	Rhodobacterales	Rhodobacteraceae	Amaricoccus
500	B_OTU63032	0.00540506	0.688889	0.476929	High pH	Bacteria	Planctomycetes	Planctomycetia	Pirellulales	Pirellulaceae
502	B_OTU61023	0.00546914	0.733333	0.482128	High pH	Bacteria	Acidobacteria	Solibacteres	Solibacterales
503	B_OTU10243	0.0198828	0.977778	0.38588	High pH	Bacteria	Nitrospirae	Nitrospira	Nitrospirales	0319-6A21
504	B_OTU9288	0.00733537	0.655556	0.350208	High pH	Bacteria	Acidobacteria	Acidobacteria-6	CCU21
507	B_OTU6894	0.0240015	1	0.610099	High pH	Bacteria	Proteobacteria	Alphaproteobacteria	Rhodospirillales	Rhodospirillaceae	Skermanella
508	B_OTU68257	0.00994092	0.822222	0.411332	High pH	Bacteria	Acidobacteria	Acidobacteria-6	iii1-15
509	B_OTU57459	0.00765692	0.811111	0.523322	High pH	Bacteria	Actinobacteria	MB-A2-108	0319-7L14
512	B_OTU8360	0.037193	0.977778	0.321758	High pH	Bacteria	Proteobacteria	Alphaproteobacteria	Sphingomonadales	Sphingomonadaceae	Kaistobacter
513	B_OTU7733	0.0332354	0.988889	0.319222	High pH	Bacteria	Bacteroidetes	Cytophagia	Cytophagales	Cytophagaceae
514	B_OTU10574	0.0154429	0.933333	0.38132	High pH	Bacteria	Gemmatimonadetes	Gemmatimonadetes
516	B_OTU63207	0.0178878	1	0.497235	High pH	Bacteria	Proteobacteria	Betaproteobacteria
517	B_OTU6735	0.00759284	0.777778	0.478438	High pH	Bacteria	Actinobacteria	Thermoleophilia	Gaiellales	Gaiellaceae
518	B_OTU6116	0.0225536	0.966667	0.381253	High pH	Bacteria	Bacteroidetes	[Saprospirae]	[Saprospirales]	Saprospiraceae
519	B_OTU5641	0.0208482	0.977778	0.50329	High pH	Bacteria	WS3	PRR-12	Sediment-1	PRR-10
520	B_OTU68409	0.00849353	0.644444	0.473488	High pH	Bacteria	Chloroflexi	Anaerolineae	SBR1031	A4b
524	F_OTU3290	0.0295032	0.944444	0.278214	High pH	Fungi	Ascomycota	Dothideomycetes	Pleosporales	Phaeosphaeriaceae	unidentified	Phaeosphaeriaceae sp
525	B_OTU2242	0.0816254	1	0.511616	High pH	Bacteria	Proteobacteria	Gammaproteobacteria	Xanthomonadales	Xanthomonadaceae	Lysobacter
527	B_OTU4199	0.00949057	0.866667	0.377321	High pH	Bacteria	Bacteroidetes	[Saprospirae]	[Saprospirales]	Chitinophagaceae	Flavisolibacter
530	F_OTU3875	0.0962003	0.988889	0.343148	High pH	Fungi	Ascomycota	Incertae sedis	Incertae sedis	Incertae sedis	Staphylotrichum	Staphylotrichum sp
531	B_OTU53827	0.00466477	0.677778	0.527853	High pH	Bacteria	Chloroflexi	Anaerolineae	H39
532	B_OTU6845	0.00878276	0.788889	0.464303	High pH	Bacteria	Actinobacteria	Thermoleophilia	Solirubrobacterales
534	B_OTU9018	0.00868692	0.888889	0.390346	High pH	Bacteria	Proteobacteria	Alphaproteobacteria	Rhizobiales	Hyphomicrobiaceae	Rhodoplanes
535	B_OTU59711	0.0088475	0.822222	0.537284	High pH	Bacteria	Nitrospirae	Nitrospira	Nitrospirales	0319-6A21
538	B_OTU3381	0.0141561	0.933333	0.512316	High pH	Bacteria	Acidobacteria	Acidobacteria-6	iii1-15	RB40
539	B_OTU9022	0.0165048	0.955556	0.46708	High pH	Bacteria	Actinobacteria	Thermoleophilia	Solirubrobacterales
540	B_OTU4888	0.00875064	0.755556	0.462066	High pH	Bacteria	Chloroflexi	Ellin6529
541	B_OTU67092	0.00540513	0.677778	0.465582	High pH	Bacteria	Planctomycetes	Planctomycetia	Pirellulales	Pirellulaceae
542	B_OTU4427	0.023358	1	0.286358	High pH	Bacteria	Proteobacteria	Betaproteobacteria
544	B_OTU6639	0.0130302	0.922222	0.543145	High pH	Bacteria	Acidobacteria	Acidobacteria-6	CCU21
545	B_OTU61387	0.020269	0.966667	0.578266	High pH	Bacteria	Nitrospirae	Nitrospira	Nitrospirales	0319-6A21
546	B_OTU8419	0.00871869	0.811111	0.448069	High pH	Bacteria	Acidobacteria	[Chloracidobacteria]	44524
549	B_OTU6416	0.0293101	0.955556	0.407579	High pH	Bacteria	Proteobacteria	Gammaproteobacteria	Xanthomonadales	Xanthomonadaceae	Arenimonas
550	B_OTU3766	0.00717426	0.766667	0.477627	High pH	Bacteria	Planctomycetes	Planctomycetia	Pirellulales	Pirellulaceae
552	B_OTU8411	0.041665	0.988889	0.357271	High pH	Bacteria	Proteobacteria	Alphaproteobacteria	Rhizobiales	Hyphomicrobiaceae
553	B_OTU10846	0.0111957	0.877778	0.48334	High pH	Bacteria	Chloroflexi	C0119
555	B_OTU4030	0.00489016	0.666667	0.516942	High pH	Bacteria	Proteobacteria	Alphaproteobacteria	Rhodospirillales	Rhodospirillaceae
556	F_OTU2927	0.332325	1	0.236291	High pH	Fungi	Ascomycota	Sordariomycetes	Hypocreales	Incertae sedis	Acremonium	Acremonium nepalense
557	B_OTU6358	0.00871841	0.877778	0.541455	High pH	Bacteria	Planctomycetes	Planctomycetia	Gemmatales	Isosphaeraceae
558	B_OTU10952	0.0101027	0.822222	0.337207	High pH	Bacteria	Gemmatimonadetes	Gemmatimonadetes
560	B_OTU5568	0.0435633	1	0.701212	High pH	Bacteria	Acidobacteria	Acidobacteria-6	iii1-15
565	F_OTU2893	0.0412469	0.911111	0.301771	High pH	Fungi	Ascomycota	Eurotiomycetes	Chaetothyriales	Chaetothyriaceae	Cyphellophora	Cyphellophora fusarioides
566	F_OTU3808	0.0218135	0.833333	0.28406	High pH	Fungi	Ascomycota	Sordariomycetes	Hypocreales	Incertae sedis	Acremonium	Acremonium sp R8_9
567	B_OTU3310	0.040507	0.988889	0.606986	High pH	Bacteria	Acidobacteria	Acidobacteria-6	iii1-15
568	B_OTU1866	0.0838454	1	0.654867	High pH	Bacteria	Proteobacteria	Betaproteobacteria	MND1
569	B_OTU3294	0.0765098	1	0.616821	High pH	Bacteria	Gemmatimonadetes
570	B_OTU10679	0.00936245	0.722222	0.329567	High pH	Bacteria	Actinobacteria	Rubrobacteria	Rubrobacterales	Rubrobacteraceae
571	B_OTU7271	0.0120967	0.888889	0.310573	High pH	Bacteria	Actinobacteria	Thermoleophilia	Solirubrobacterales
572	B_OTU5346	0.0104564	0.755556	0.283164	High pH	Bacteria	Acidobacteria	[Chloracidobacteria]	RB41
575	B_OTU5332	0.0307261	0.988889	0.443466	High pH	Bacteria	Proteobacteria	Alphaproteobacteria	Rhizobiales	Phyllobacteriaceae	Mesorhizobium
576	B_OTU745	0.00949102	0.833333	0.419316	High pH	Bacteria	Proteobacteria	Alphaproteobacteria	Sphingomonadales	Sphingomonadaceae	Kaistobacter
578	B_OTU51925	0.00637029	0.666667	0.578319	High pH	Bacteria	Acidobacteria	Acidobacteria-6	iii1-15
580	B_OTU2496	0.0105204	0.866667	0.580453	High pH	Bacteria	Proteobacteria	Alphaproteobacteria	Rhodospirillales
581	B_OTU62735	0.00878316	0.766667	0.536084	High pH	Bacteria	Proteobacteria	Alphaproteobacteria	Rhodospirillales
583	B_OTU2390	0.00945875	0.888889	0.642894	High pH	Bacteria	Actinobacteria	Thermoleophilia	Solirubrobacterales
585	B_OTU3981	0.0499018	1	0.548874	High pH	Bacteria	Proteobacteria	Betaproteobacteria	MND1
586	B_OTU38495	0.00530822	0.688889	0.449583	High pH	Bacteria	Acidobacteria	Acidobacteria-6	iii1-15
587	B_OTU220	0.00804318	0.855556	0.454485	High pH	Bacteria	Planctomycetes	OM190	CL500-15
589	B_OTU70896	0.0162473	0.955556	0.693973	High pH	Bacteria	Chloroflexi	Thermomicrobia	JG30-KF-CM45
590	B_OTU1013	0.0121934	0.877778	0.703099	High pH	Bacteria	Proteobacteria	Alphaproteobacteria	Rhodospirillales
591	B_OTU524	0.0820114	1	0.299109	High pH	Bacteria	Chloroflexi	Ellin6529
592	B_OTU9570	0.0210734	0.977778	0.337037	High pH	Bacteria	Proteobacteria	Alphaproteobacteria	Sphingomonadales	Sphingomonadaceae
593	B_OTU6085	0.125189	1	0.764743	High pH	Bacteria	Proteobacteria	Alphaproteobacteria	Rhodospirillales	Rhodospirillaceae
594	B_OTU8284	0.0578167	1	0.556726	High pH	Bacteria	Acidobacteria	Acidobacteria-6	iii1-15
595	B_OTU64182	0.00804281	0.788889	0.464818	High pH	Bacteria	Acidobacteria	Acidobacteria-6	CCU21
598	B_OTU10529	0.0124828	0.877778	0.584717	High pH	Bacteria	Acidobacteria	Acidobacteria-6	iii1-15
599	B_OTU64799	0.0110031	0.811111	0.485751	High pH	Bacteria	Gemmatimonadetes	Gemmatimonadetes
600	B_OTU4409	0.00710987	0.788889	0.509811	High pH	Bacteria	Acidobacteria	Acidobacteria-6	iii1-15
601	B_OTU4514	0.0482287	1	0.443774	High pH	Bacteria	Acidobacteria	Acidobacteria-6	iii1-15
605	B_OTU6158	0.0193365	0.966667	0.551182	High pH	Bacteria	Acidobacteria	Acidobacteria-6	iii1-15
606	B_OTU7231	0.0158937	0.922222	0.383131	High pH	Bacteria	Bacteroidetes	[Saprospirae]	[Saprospirales]	Chitinophagaceae	Flavisolibacter
607	B_OTU1729	0.0277338	1	0.482516	High pH	Bacteria	Acidobacteria	iii1-8	32-20
609	B_OTU2420	0.0499017	1	0.625063	High pH	Bacteria	Nitrospirae	Nitrospira	Nitrospirales	0319-6A21
612	B_OTU4304	0.0109062	0.855556	0.316543	High pH	Bacteria	Acidobacteria	iii1-8	DS-18
613	B_OTU20927	0.00826806	0.866667	0.228202	High pH	Bacteria	Firmicutes	Bacilli	Bacillales	Planococcaceae	Paenisporosarcina
614	B_OTU66777	0.00756078	0.666667	0.325572	High pH	Bacteria	Proteobacteria	Alphaproteobacteria	Rhodospirillales
615	B_OTU9525	0.00553373	0.655556	0.441181	High pH	Bacteria	Acidobacteria	Sva0725	Sva0725
616	F_OTU4500	0.00817162	0.722222	0.23237	High pH	Fungi	Ascomycota	Sordariomycetes	Xylariales	unidentified	unidentified	Xylariales sp
617	B_OTU2449	0.0239052	1	0.588546	High pH	Bacteria	Proteobacteria	Alphaproteobacteria	Rhizobiales
618	B_OTU5902	0.0842637	1	0.389362	High pH	Bacteria	Acidobacteria	Acidobacteria-6	iii1-15
619	B_OTU9284	0.0532801	1	0.807916	High pH	Bacteria	Acidobacteria	Acidobacteria-6	iii1-15
620	B_OTU3022	0.0317554	1	0.726413	High pH	Bacteria	Acidobacteria	Acidobacteria-6	iii1-15
622	B_OTU66444	0.00414989	0.7	0.549247	High pH	Bacteria	Chloroflexi	Anaerolineae	Caldilineales	Caldilineaceae	Caldilinea
623	B_OTU1059	0.0264144	0.988889	0.640298	High pH	Bacteria	Actinobacteria	Actinobacteria	Actinomycetales	Geodermatophilaceae	Geodermatophilus
624	B_OTU3929	0.135999	1	0.624592	High pH	Bacteria	Actinobacteria	Actinobacteria	Actinomycetales	Nocardioidaceae
626	B_OTU4875	0.00984467	0.888889	0.556906	High pH	Bacteria	Planctomycetes	Planctomycetia	Pirellulales	Pirellulaceae
630	F_OTU3367	0.0467808	0.966667	0.386886	High pH	Fungi	Ascomycota	Sordariomycetes	Hypocreales
631	B_OTU60214	0.00826831	0.755556	0.47	High pH	Bacteria	Nitrospirae	Nitrospira	Nitrospirales	0319-6A21
632	B_OTU5239	0.00942621	0.811111	0.282947	High pH	Bacteria	Actinobacteria	Thermoleophilia	Gaiellales	Gaiellaceae
634	F_OTU4193	0.454812	0.988889	0.371803	High pH	Fungi	Ascomycota	Sordariomycetes	Sordariales	Chaetomiaceae	Humicola	Humicola nigrescens
636	B_OTU3436	0.00858991	0.866667	0.497799	High pH	Bacteria	Proteobacteria	Gammaproteobacteria	Xanthomonadales	Sinobacteraceae	Steroidobacter
637	F_OTU3174	0.0145746	0.811111	0.333514	High pH	Fungi	Ascomycota	Dothideomycetes	Pleosporales	Leptosphaeriaceae
640	B_OTU9317	0.00875102	0.8	0.428351	High pH	Bacteria	Acidobacteria	Acidobacteria-6	iii1-15
642	B_OTU63830	0.0126436	0.933333	0.414805	High pH	Bacteria	Proteobacteria	Deltaproteobacteria	Myxococcales	Haliangiaceae
643	B_OTU4236	0.00765675	0.811111	0.407497	High pH	Bacteria	Acidobacteria	[Chloracidobacteria]	RB41
644	B_OTU6620	0.0093299	0.888889	0.537536	High pH	Bacteria	Acidobacteria	Acidobacteria-6	iii1-15
657	B_OTU5939	0.16338	1	0.702527	High pH	Bacteria	Proteobacteria	Betaproteobacteria	MND1
658	B_OTU4465	0.00720694	0.722222	0.457025	High pH	Bacteria	Proteobacteria	Alphaproteobacteria	Rhodobacterales	Rhodobacteraceae	Amaricoccus
661	F_OTU2616	0.0319165	0.922222	0.286249	High pH	Fungi	Ascomycota	Sordariomycetes	Hypocreales	Incertae sedis	Acremonium	Acremonium sp R8_9
663	B_OTU4504	0.0230038	0.988889	0.444277	High pH	Bacteria	Chloroflexi	Anaerolineae	envOPS12
664	B_OTU59366	0.00472944	0.733333	0.519327	High pH	Bacteria	Chloroflexi	TK10
666	B_OTU4469	0.0107454	0.9	0.490854	High pH	Bacteria	Gemmatimonadetes	Gemmatimonadetes
667	F_OTU2567	0.0555323	1	0.36733	High pH	Fungi	Ascomycota	Sordariomycetes	Hypocreales	Hypocreaceae
668	B_OTU57759	0.00569435	0.711111	0.529905	High pH	Bacteria	Chloroflexi	Thermomicrobia	AKYG1722
669	B_OTU2567	0.00926585	0.811111	0.222338	High pH	Bacteria	Bacteroidetes	[Saprospirae]	[Saprospirales]	Chitinophagaceae
671	B_OTU2108	0.00791404	0.855556	0.466479	High pH	Bacteria	Proteobacteria	Deltaproteobacteria	Myxococcales	Myxococcaceae	Myxococcus
672	B_OTU2967	0.00910502	0.844444	0.454509	High pH	Bacteria	Proteobacteria	Alphaproteobacteria	Rhodobacterales	Rhodobacteraceae	Amaricoccus
674	F_OTU2263	0.00730358	0.811111	0.366593	High pH	Fungi	Ascomycota	Sordariomycetes	Sordariales	Chaetomiaceae	Chaetomium
675	B_OTU2111	0.00813959	0.788889	0.59873	High pH	Bacteria	Nitrospirae	Nitrospira	Nitrospirales	0319-6A21
676	B_OTU4264	0.0060486	0.655556	0.437708	High pH	Bacteria	Acidobacteria	Solibacteres	Solibacterales	PAUC26f
677	B_OTU2702	0.0160545	0.866667	0.235212	High pH	Bacteria	Proteobacteria	Gammaproteobacteria	Xanthomonadales	Xanthomonadaceae	Pseudoxanthomonas	kaohsiungensis
679	B_OTU67335	0.00505106	0.6	0.55548	High pH	Bacteria	Chloroflexi	Thermomicrobia	JG30-KF-CM45
681	B_OTU9117	0.0165045	0.922222	0.659619	High pH	Bacteria	Acidobacteria	Acidobacteria-6	iii1-15	RB40
685	B_OTU1031	0.0118392	0.944444	0.640761	High pH	Bacteria	Actinobacteria	Acidimicrobiia	Acidimicrobiales
686	B_OTU3039	0.0114536	0.788889	0.374197	High pH	Bacteria	Actinobacteria	Thermoleophilia	Gaiellales	Gaiellaceae
693	F_OTU4372	0.0848428	0.944444	0.338445	High pH	Fungi	Ascomycota	Sordariomycetes	Sordariales	Chaetomiaceae
694	B_OTU4797	0.00595153	0.822222	0.506567	High pH	Bacteria	Chloroflexi	Anaerolineae	S0208
696	B_OTU67935	0.0103275	0.866667	0.464893	High pH	Bacteria	Planctomycetes
698	B_OTU5454	0.0248379	0.988889	0.598956	High pH	Bacteria	Proteobacteria	Deltaproteobacteria	Syntrophobacterales	Syntrophobacteraceae
700	B_OTU1279	0.00813953	0.822222	0.239028	High pH	Bacteria	Actinobacteria	Actinobacteria	Actinomycetales	Micrococcaceae
702	B_OTU5971	0.0433384	1	0.44628	High pH	Bacteria	Actinobacteria	Actinobacteria	Actinomycetales	Micromonosporaceae	Pilimelia
703	B_OTU67423	0.00984485	0.877778	0.57101	High pH	Bacteria	Proteobacteria	Betaproteobacteria	SC-I-84
705	B_OTU7193	0.0102951	0.877778	0.333038	High pH	Bacteria	Proteobacteria	Alphaproteobacteria	Sphingomonadales	Sphingomonadaceae
708	B_OTU2296	0.0125147	0.933333	0.499005	High pH	Bacteria	Gemmatimonadetes	Gemm-2
709	B_OTU2660	0.0114856	0.866667	0.330037	High pH	Bacteria	Actinobacteria	Actinobacteria	Actinomycetales	Streptomycetaceae	Streptomyces
710	B_OTU2456	0.0109063	0.877778	0.383735	High pH	Bacteria	Gemmatimonadetes	Gemm-5
711	B_OTU6734	0.0138989	0.966667	0.583656	High pH	Bacteria	Acidobacteria	Solibacteres	Solibacterales
713	B_OTU5873	0.00978084	0.877778	0.617592	High pH	Bacteria	Proteobacteria	Alphaproteobacteria	Rhodospirillales	Rhodospirillaceae
714	B_OTU6847	0.00801077	0.866667	0.538835	High pH	Bacteria	Actinobacteria	Thermoleophilia	Solirubrobacterales
715	B_OTU8897	0.0140276	0.877778	0.32965	High pH	Bacteria	Gemmatimonadetes	Gemmatimonadetes
716	B_OTU7448	0.0165368	0.988889	0.398232	High pH	Bacteria	Actinobacteria	Thermoleophilia	Solirubrobacterales
717	B_OTU73406	0.00839651	0.855556	0.544544	High pH	Bacteria	Actinobacteria	Actinobacteria	Micrococcales
718	B_OTU62406	0.0130942	0.922222	0.516259	High pH	Bacteria	Proteobacteria	Alphaproteobacteria	Rhodospirillales	Acetobacteraceae
719	B_OTU4649	0.00704565	0.788889	0.424524	High pH	Bacteria	Proteobacteria	Alphaproteobacteria	Rhizobiales
724	F_OTU3667	0.180754	0.966667	0.34117	High pH	Fungi	Ascomycota	Sordariomycetes	Hypocreales	Nectriaceae	Gibberella	Gibberella zeae
725	B_OTU10306	0.014285	0.911111	0.450828	High pH	Bacteria	Gemmatimonadetes	Gemm-1
727	F_OTU4171	0.116985	1	0.276698	High pH	Fungi	Zygomycota	Incertae sedis	Mortierellales	Mortierellaceae	Mortierella
728	B_OTU8163	0.0208483	0.944444	0.510914	High pH	Bacteria	Bacteroidetes	[Saprospirae]	[Saprospirales]	Saprospiraceae
729	B_OTU3673	0.016376	0.8	0.23526	High pH	Bacteria	Actinobacteria	Rubrobacteria	Rubrobacterales	Rubrobacteraceae	Rubrobacter
731	B_OTU61109	0.0138023	0.955556	0.495109	High pH	Bacteria	Proteobacteria	Gammaproteobacteria	Xanthomonadales	Sinobacteraceae
734	B_OTU1636	0.0141559	0.911111	0.229934	High pH	Bacteria	Verrucomicrobia	[Pedosphaerae]	[Pedosphaerales]
735	F_OTU4259	0.0802739	0.9	0.38121	High pH	Fungi	Ascomycota	Sordariomycetes	Hypocreales	unidentified	unidentified	Hypocreales sp
736	B_OTU1942	0.0162796	0.955556	0.331238	High pH	Bacteria	Actinobacteria	Thermoleophilia	Solirubrobacterales
739	B_OTU4827	0.0256423	0.933333	0.378735	High pH	Bacteria	Proteobacteria	Betaproteobacteria
740	B_OTU68512	0.0150569	0.933333	0.493268	High pH	Bacteria	Proteobacteria	Gammaproteobacteria	Xanthomonadales	Xanthomonadaceae
742	F_OTU2829	0.205077	1	0.265543	High pH	Fungi	Ascomycota	Sordariomycetes	Microascales	unidentified	unidentified	Microascales sp
743	B_OTU518	0.00939409	0.877778	0.440434	High pH	Bacteria	Proteobacteria	Alphaproteobacteria	Rhizobiales	Hyphomicrobiaceae
746	B_OTU292	0.0141238	0.944444	0.489785	High pH	Bacteria	Proteobacteria	Betaproteobacteria	Burkholderiales	Burkholderiaceae
747	F_OTU2751	0.0142847	0.9	0.309214	High pH	Fungi	Ascomycota	Sordariomycetes	Xylariales	unidentified	unidentified	Xylariales sp
748	B_OTU4741	0.00978014	0.933333	0.491513	High pH	Bacteria	Proteobacteria	Alphaproteobacteria	Rhizobiales	Hyphomicrobiaceae	Rhodoplanes
749	B_OTU550	0.00891159	0.866667	0.429874	High pH	Bacteria	Proteobacteria	Deltaproteobacteria	Myxococcales	Haliangiaceae
750	B_OTU6405	0.0139949	0.922222	0.505777	High pH	Bacteria	Gemmatimonadetes	Gemmatimonadetes
751	B_OTU9795	0.0318842	1	0.391343	High pH	Bacteria	Chloroflexi	Gitt-GS-136
754	F_OTU3337	0.0142852	0.622222	0.283473	High pH	Fungi	Basidiomycota	Agaricomycetes
755	B_OTU8900	0.00598438	0.633333	0.343935	High pH	Bacteria	Acidobacteria	[Chloracidobacteria]	PK29
756	B_OTU2618	0.00469671	0.755556	0.498566	High pH	Bacteria	Acidobacteria	Acidobacteria-6	iii1-15
757	F_OTU2972	0.127473	0.922222	0.312869	High pH	Fungi	Ascomycota	Dothideomycetes	Pleosporales
758	B_OTU3021	0.0128044	0.933333	0.479506	High pH	Bacteria	Proteobacteria	Alphaproteobacteria	Rhizobiales	Hyphomicrobiaceae	Rhodoplanes
764	B_OTU8012	0.168302	1	0.416449	High pH	Bacteria	Proteobacteria	Gammaproteobacteria	Xanthomonadales	Xanthomonadaceae	Thermomonas
765	B_OTU5853	0.025932	0.755556	0.276518	High pH	Archaea	Crenarchaeota	Thaumarchaeota	Nitrososphaerales	Nitrososphaeraceae	Candidatus Nitrososphaera
772	F_OTU3744	0.00859006	0.766667	0.260001	High pH	Fungi	Ascomycota	Dothideomycetes	Capnodiales	Davidiellaceae	Cladosporium	Cladosporium sp 4 MU_2012
773	B_OTU2533	0.00669206	0.733333	0.342231	High pH	Bacteria	Proteobacteria	Deltaproteobacteria	[Entotheonellales]	[Entotheonellaceae]
778	F_OTU3054	0.0388016	1	0.365606	High pH	Fungi	Ascomycota	Sordariomycetes	Hypocreales	Incertae sedis
785	B_OTU6475	0.0212023	0.955556	0.442382	High pH	Bacteria	WS3	PRR-12	LD1-PA13
787	B_OTU7701	0.010295	0.911111	0.343564	High pH	Bacteria	Actinobacteria	Actinobacteria	Actinomycetales	Nocardioidaceae
788	B_OTU73160	0.0233577	1	0.350818	High pH	Bacteria	Actinobacteria	Thermoleophilia	Gaiellales	Gaiellaceae
792	F_OTU3236	0.035552	0.877778	0.255135	High pH	Fungi	Ascomycota	Sordariomycetes	Hypocreales	Clavicipitaceae	Metarhizium	Metarhizium pinghaense
793	B_OTU10490	0.00524453	0.677778	0.369643	High pH	Bacteria	Proteobacteria	Gammaproteobacteria	Xanthomonadales	Sinobacteraceae
795	F_OTU4691	0.0319161	0.944444	0.353781	High pH	Fungi	Ascomycota	Dothideomycetes	Pleosporales	Sporormiaceae	Preussia	Preussia sp
796	B_OTU2867	0.0572698	1	0.249391	High pH	Bacteria	Chloroflexi	Ellin6529
797	B_OTU9472	0.0110028	0.911111	0.559184	High pH	Bacteria	Proteobacteria	Betaproteobacteria	Burkholderiales	Alcaligenaceae
799	B_OTU4645	0.0223608	0.988889	0.547893	High pH	Bacteria	Proteobacteria	Alphaproteobacteria	Rhizobiales	Bradyrhizobiaceae
801	B_OTU2058	0.00637032	0.788889	0.512743	High pH	Bacteria	Proteobacteria	Deltaproteobacteria	Myxococcales
802	B_OTU7573	0.00591943	0.766667	0.555339	High pH	Bacteria	Acidobacteria	Acidobacteria-6	iii1-15	mb2424
804	B_OTU4417	0.00746377	0.888889	0.397426	High pH	Bacteria	Proteobacteria	Alphaproteobacteria	Rhizobiales
805	B_OTU7247	0.00759252	0.766667	0.323569	High pH	Bacteria	Bacteroidetes	[Saprospirae]	[Saprospirales]	Chitinophagaceae
806	B_OTU4955	0.00418305	0.644444	0.468698	High pH	Bacteria	Planctomycetes	Planctomycetia	Gemmatales	Gemmataceae
808	B_OTU6107	0.00411802	0.644444	0.538855	High pH	Bacteria	Actinobacteria	Acidimicrobiia	Acidimicrobiales
809	B_OTU3866	0.0052119	0.755556	0.453594	High pH	Bacteria	Armatimonadetes	[Fimbriimonadia]	[Fimbriimonadales]
810	B_OTU2513	0.0138984	0.944444	0.44272	High pH	Bacteria	Proteobacteria	Gammaproteobacteria	Xanthomonadales	Xanthomonadaceae	Lysobacter
811	B_OTU2238	0.00524373	0.722222	0.460705	High pH	Bacteria	Actinobacteria	Acidimicrobiia	Acidimicrobiales	C111
812	B_OTU57478	0.00839721	0.788889	0.341212	High pH	Bacteria	Chloroflexi	Thermomicrobia	JG30-KF-CM45
814	B_OTU2462	0.0405712	0.844444	0.25961	High pH	Archaea	Crenarchaeota	Thaumarchaeota	Nitrososphaerales	Nitrososphaeraceae	Candidatus Nitrososphaera
816	B_OTU348	0.0269292	1	0.483814	High pH	Bacteria	Proteobacteria	Betaproteobacteria	MND1
818	B_OTU5057	0.0404104	1	0.532295	High pH	Bacteria	Proteobacteria	Alphaproteobacteria	Sphingomonadales	Erythrobacteraceae
820	B_OTU5339	0.0226499	1	0.338051	High pH	Bacteria	Proteobacteria	Gammaproteobacteria	Xanthomonadales	Xanthomonadaceae	Thermomonas
821	B_OTU1432	0.00952331	0.766667	0.304756	High pH	Bacteria	Bacteroidetes	[Saprospirae]	[Saprospirales]	Saprospiraceae
822	F_OTU2499	0.0286025	0.888889	0.399006	High pH	Fungi	Ascomycota	Leotiomycetes	Helotiales
823	B_OTU54442	0.00633785	0.611111	0.270557	High pH	Bacteria	Acidobacteria	RB25
825	B_OTU4769	0.016762	0.911111	0.402115	High pH	Bacteria	Actinobacteria	Actinobacteria	Actinomycetales	Pseudonocardiaceae
826	F_OTU2899	0.197838	1	0.255793	High pH	Fungi	Zygomycota	Incertae sedis	Mortierellales	Mortierellaceae	Mortierella	Mortierella sp
827	B_OTU3180	0.011775	0.911111	0.536459	High pH	Bacteria	Acidobacteria	Acidobacteria-6	iii1-15
828	B_OTU2579	0.00460059	0.633333	0.294762	High pH	Bacteria	Chloroflexi	Chloroflexi	[Roseiflexales]
831	B_OTU6628	0.0115823	0.877778	0.419801	High pH	Bacteria	Nitrospirae	Nitrospira	Nitrospirales	0319-6A21
832	B_OTU6034	0.0228107	0.977778	0.390331	High pH	Bacteria	Actinobacteria	Actinobacteria	Actinomycetales	Actinosynnemataceae	Saccharothrix
833	B_OTU71871	0.0122898	0.777778	0.247537	High pH	Bacteria	Proteobacteria	Gammaproteobacteria	Xanthomonadales	Xanthomonadaceae
834	B_OTU4730	0.062868	1	0.40861	High pH	Bacteria	Proteobacteria	Betaproteobacteria	MND1
835	B_OTU6066	0.00833238	0.766667	0.47223	High pH	Bacteria	Bacteroidetes	Cytophagia	Cytophagales	Cytophagaceae
839	B_OTU10824	0.0254813	0.988889	0.321747	High pH	Bacteria	Acidobacteria	Acidobacteria-6	iii1-15
842	B_OTU4047	0.00756001	0.8	0.388494	High pH	Bacteria	Acidobacteria	Acidobacteria-6	iii1-15	RB40
844	B_OTU4395	0.0221351	1	0.422835	High pH	Bacteria	Proteobacteria	Betaproteobacteria
845	B_OTU611	0.0296321	1	0.320028	High pH	Bacteria	Gemmatimonadetes	Gemm-1
847	B_OTU5078	0.0197867	0.977778	0.332942	High pH	Bacteria	WS3	PRR-12	Sediment-1
848	B_OTU4933	0.0167297	0.922222	0.319698	High pH	Bacteria	Nitrospirae	Nitrospira	Nitrospirales	0319-6A21
854	B_OTU2365	0.010906	0.955556	0.47503	High pH	Bacteria	Actinobacteria	Actinobacteria	Actinomycetales	Micromonosporaceae
856	B_OTU2325	0.0243553	0.988889	0.395147	High pH	Bacteria	Chloroflexi	P2-11E
857	F_OTU4321	0.124224	0.966667	0.368816	High pH	Fungi	Ascomycota	Sordariomycetes	Sordariales	Lasiosphaeriaceae	Zopfiella	Zopfiella marina
858	B_OTU2330	0.00434329	0.622222	0.355941	High pH	Bacteria	Gemmatimonadetes	Gemmatimonadetes	C114
859	B_OTU3402	0.00743178	0.755556	0.488763	High pH	Bacteria	Acidobacteria	Acidobacteria-6	iii1-15	RB40
861	B_OTU61907	0.00521204	0.677778	0.278545	High pH	Bacteria	Acidobacteria	Solibacteres	Solibacterales
863	B_OTU4152	0.00804318	0.866667	0.420261	High pH	Bacteria	Acidobacteria	BPC102	MVS-40
865	B_OTU8830	0.0157967	0.944444	0.319204	High pH	Bacteria	Bacteroidetes	Cytophagia	Cytophagales	Cytophagaceae	Adhaeribacter
868	B_OTU6131	0.0133518	0.944444	0.534621	High pH	Bacteria	Acidobacteria	Acidobacteria-6	CCU21
870	B_OTU443	0.0155398	0.633333	0.239788	High pH	Archaea	Crenarchaeota	Thaumarchaeota	Nitrososphaerales	Nitrososphaeraceae	Candidatus Nitrososphaera
872	B_OTU72221	0.00884773	0.744444	0.355596	High pH	Bacteria	Actinobacteria	Actinobacteria	Actinomycetales
874	B_OTU734	0.0718445	1	0.227187	High pH	Bacteria	Chloroflexi	Ellin6529
876	F_OTU2592	0.236189	0.911111	0.358523	High pH	Fungi	Ascomycota	Sordariomycetes	Sordariales	Lasiosphaeriaceae	Schizothecium	Schizothecium carpinicola
878	F_OTU3804	0.0229401	0.677778	0.244963	High pH	Fungi	Ascomycota	Leotiomycetes	Helotiales	Helotiaceae	Crocicreas	Crocicreas sp F
881	B_OTU3189	0.0339754	0.977778	0.650814	High pH	Bacteria	Proteobacteria	Deltaproteobacteria	NB1-j
882	B_OTU7408	0.00897617	0.811111	0.340576	High pH	Bacteria	Proteobacteria	Deltaproteobacteria	NB1-j	NB1-i
884	B_OTU4691	0.0114535	0.9	0.530309	High pH	Bacteria	Acidobacteria	Acidobacteria-6	iii1-15
885	B_OTU9199	0.0149601	0.988889	0.482235	High pH	Bacteria	Actinobacteria	Acidimicrobiia	Acidimicrobiales
888	F_OTU3467	0.0515749	0.977778	0.318955	High pH	Fungi	Ascomycota	Sordariomycetes	Hypocreales	Bionectriaceae	Clonostachys	Bionectria sp ASR
891	B_OTU4789	0.0139628	0.944444	0.373451	High pH	Bacteria	Actinobacteria	Actinobacteria	Actinomycetales	Micromonosporaceae	Catellatospora
892	B_OTU3936	0.0104562	0.788889	0.266658	High pH	Bacteria	Bacteroidetes	Cytophagia	Cytophagales	Cytophagaceae
893	B_OTU7470	0.00807483	0.888889	0.554155	High pH	Bacteria	Proteobacteria	Alphaproteobacteria	Rhodospirillales	Acetobacteraceae
894	B_OTU2474	0.00611231	0.733333	0.427413	High pH	Bacteria	WS3	PRR-12	Sediment-1	PRR-10
899	B_OTU4762	0.00704584	0.8	0.291566	High pH	Bacteria	Actinobacteria	Acidimicrobiia	Acidimicrobiales
900	B_OTU7440	0.0130619	0.911111	0.501983	High pH	Bacteria	Actinobacteria	Thermoleophilia	Gaiellales	Gaiellaceae
901	B_OTU4636	0.00923355	0.888889	0.476094	High pH	Bacteria	Proteobacteria	Alphaproteobacteria	Rhizobiales
903	B_OTU7321	0.00733519	0.844444	0.25487	High pH	Bacteria	Bacteroidetes	[Saprospirae]	[Saprospirales]	Chitinophagaceae
904	B_OTU2893	0.00826764	0.788889	0.26854	High pH	Bacteria	Chloroflexi	Chloroflexi	[Roseiflexales]	[Kouleothrixaceae]
905	B_OTU61319	0.00492206	0.722222	0.507296	High pH	Bacteria	Proteobacteria	Alphaproteobacteria	Rhodospirillales	Acetobacteraceae
906	B_OTU9813	0.00591952	0.744444	0.480783	High pH	Bacteria	Proteobacteria	Alphaproteobacteria	Rhizobiales	Hyphomicrobiaceae	Rhodobium
907	F_OTU3036	0.105112	0.988889	0.33774	High pH	Fungi	Ascomycota
908	B_OTU9240	0.00875094	0.855556	0.482976	High pH	Bacteria	Chloroflexi	TK10	AKYG885	Dolo
909	B_OTU14382	0.014381	0.966667	0.347912	High pH	Bacteria	Proteobacteria	Gammaproteobacteria	Xanthomonadales	Xanthomonadaceae
910	F_OTU3686	0.0246773	0.866667	0.255783	High pH	Fungi	Ascomycota	Sordariomycetes	Hypocreales	Incertae sedis	Acremonium	Acremonium sp
915	B_OTU61481	0.00614508	0.722222	0.249	High pH	Bacteria	Actinobacteria	Actinobacteria
916	B_OTU827	0.0108419	0.955556	0.511373	High pH	Bacteria	Acidobacteria	Acidobacteria-5
917	B_OTU11208	0.0069492	0.788889	0.464956	High pH	Bacteria	Proteobacteria	Deltaproteobacteria	Myxococcales	Polyangiaceae
918	B_OTU6303	0.0238407	1	0.460181	High pH	Bacteria	Chloroflexi	S085
919	B_OTU8917	0.0136412	0.955556	0.502396	High pH	Bacteria	Acidobacteria	iii1-8	DS-18
920	B_OTU2052	0.0100705	0.888889	0.457353	High pH	Bacteria	Planctomycetes	OM190	agg27
921	B_OTU7627	0.00958766	0.9	0.46096	High pH	Bacteria	Actinobacteria	Thermoleophilia	Solirubrobacterales
922	B_OTU71997	0.00511529	0.666667	0.22958	High pH	Bacteria	Proteobacteria	Gammaproteobacteria	Thiotrichales	Piscirickettsiaceae
925	B_OTU2084	0.00781798	0.744444	0.358163	High pH	Bacteria	Bacteroidetes	Cytophagia	Cytophagales	Cytophagaceae
927	F_OTU2880	0.00556613	0.644444	0.396589	High pH	Fungi	Ascomycota	Sordariomycetes	Sordariales	Lasiosphaeriaceae
929	B_OTU10743	0.0123225	0.6	0.25279	High pH	Archaea	Crenarchaeota	Thaumarchaeota	Nitrososphaerales	Nitrososphaeraceae	Candidatus Nitrososphaera
930	B_OTU6530	0.0286027	0.988889	0.501659	High pH	Bacteria	Acidobacteria	Acidobacteria-6	iii1-15
931	F_OTU2742	0.01229	0.855556	0.253904	High pH	Fungi	Ascomycota	Sordariomycetes	Sordariales	Chaetomiaceae	Humicola	Humicola nigrescens
933	F_OTU3495	0.010617	0.744444	0.409113	High pH	Fungi	Ascomycota	Sordariomycetes	Sordariales	Lasiosphaeriaceae
935	B_OTU4399	0.01184	0.677778	0.233916	High pH	Archaea	Crenarchaeota	Thaumarchaeota	Nitrososphaerales	Nitrososphaeraceae	Candidatus Nitrososphaera	SCA1170
937	B_OTU874	0.0341042	0.988889	0.2318	High pH	Bacteria	Proteobacteria	Gammaproteobacteria	Xanthomonadales	Xanthomonadaceae	Lysobacter
938	B_OTU4622	0.022457	1	0.670962	High pH	Bacteria	Proteobacteria	Betaproteobacteria	SC-I-84
939	B_OTU3780	0.00656281	0.711111	0.495486	High pH	Bacteria	WS3	PRR-12	Sediment-1
942	B_OTU72053	0.00707782	0.722222	0.364672	High pH	Bacteria	Acidobacteria	RB25
943	B_OTU8732	0.0185639	0.977778	0.342262	High pH	Bacteria	Actinobacteria	Thermoleophilia	Gaiellales	Gaiellaceae
944	B_OTU7490	0.013416	0.944444	0.416831	High pH	Bacteria	Proteobacteria	Deltaproteobacteria	Myxococcales	Haliangiaceae
948	B_OTU6062	0.0280232	0.677778	0.249495	High pH	Archaea	Crenarchaeota	Thaumarchaeota	Nitrososphaerales	Nitrososphaeraceae	Candidatus Nitrososphaera	gargensis
951	B_OTU5410	0.0055656	0.722222	0.426679	High pH	Bacteria	Verrucomicrobia	[Spartobacteria]	[Chthoniobacterales]	[Chthoniobacteraceae]
955	B_OTU5383	0.00749547	0.9	0.473441	High pH	Bacteria	Proteobacteria	Deltaproteobacteria	Syntrophobacterales	Syntrophobacteraceae
956	F_OTU4641	0.203661	0.911111	0.334281	High pH	Fungi	Ascomycota	Sordariomycetes	Incertae sedis	Incertae sedis	Myrmecridium	Myrmecridium schulzeri
958	B_OTU3934	0.027991	0.988889	0.382287	High pH	Bacteria	Proteobacteria	Betaproteobacteria	MND1
959	F_OTU2905	0.0618381	1	0.285602	High pH	Fungi	Zygomycota	Incertae sedis	Mortierellales	Mortierellaceae	Mortierella	Mortierella amoeboidea
963	B_OTU7128	0.00968357	0.877778	0.38038	High pH	Bacteria	Proteobacteria	Alphaproteobacteria	Rhizobiales	Hyphomicrobiaceae	Hyphomicrobium
964	B_OTU10893	0.0281841	0.966667	0.304583	High pH	Bacteria	Proteobacteria	Gammaproteobacteria	Xanthomonadales	Xanthomonadaceae	Lysobacter
965	B_OTU1590	0.00537282	0.633333	0.385231	High pH	Bacteria	Planctomycetes	Planctomycetia	Pirellulales	Pirellulaceae
966	B_OTU7133	0.0197867	0.977778	0.337823	High pH	Bacteria	Actinobacteria	Thermoleophilia	Solirubrobacterales
967	B_OTU7823	0.0120328	0.888889	0.484569	High pH	Bacteria	Actinobacteria	Actinobacteria	Actinomycetales	Micromonosporaceae	Actinoplanes
968	B_OTU3963	0.0100056	0.855556	0.391706	High pH	Bacteria	Verrucomicrobia	[Pedosphaerae]	[Pedosphaerales]	auto67
969	B_OTU54682	0.00427835	0.611111	0.447573	High pH	Bacteria	Planctomycetes	Phycisphaerae	WD2101
971	B_OTU1149	0.00569445	0.733333	0.373259	High pH	Bacteria	Proteobacteria	Alphaproteobacteria	Rhodospirillales	Rhodospirillaceae	Skermanella
972	F_OTU2501	0.0757053	0.9	0.377885	High pH	Fungi	Ascomycota	Sordariomycetes	Sordariales	Lasiosphaeriaceae
973	B_OTU9198	0.0114856	0.877778	0.617295	High pH	Bacteria	Acidobacteria	Acidobacteria-6	iii1-15
975	B_OTU64255	0.00379644	0.611111	0.411308	High pH	Bacteria	Actinobacteria	Actinobacteria	Actinomycetales	Micromonosporaceae
976	B_OTU5958	0.00926555	0.866667	0.391925	High pH	Bacteria	Verrucomicrobia	[Pedosphaerae]	[Pedosphaerales]	Ellin517
979	B_OTU1679	0.005308	0.766667	0.348305	High pH	Bacteria	Proteobacteria	Betaproteobacteria	Ellin6067
980	B_OTU8355	0.00855721	0.911111	0.441931	High pH	Bacteria	Acidobacteria	Solibacteres	Solibacterales
982	F_OTU4714	0.00546937	0.633333	0.248102	High pH	Fungi	Ascomycota	Sordariomycetes	Hypocreales	Incertae sedis	Geosmithia
983	B_OTU56344	0.00978052	0.8	0.565752	High pH	Bacteria	Chloroflexi	Anaerolineae	GCA004
984	B_OTU59132	0.00855793	0.822222	0.263593	High pH	Bacteria	Proteobacteria	Deltaproteobacteria	Myxococcales
987	B_OTU9085	0.00456838	0.588889	0.354583	High pH	Bacteria	Actinobacteria	Thermoleophilia	Gaiellales	Gaiellaceae
993	F_OTU3569	0.623822	1	0.29862	High pH	Fungi	Ascomycota	Sordariomycetes	Sordariales	Chaetomiaceae
994	B_OTU6646	0.0107782	0.955556	0.515017	High pH	Bacteria	Proteobacteria	Gammaproteobacteria	Xanthomonadales	Sinobacteraceae	Steroidobacter
996	B_OTU69993	0.00369989	0.633333	0.58803	High pH	Bacteria	Chloroflexi	Ellin6529
997	B_OTU7856	0.00752808	0.833333	0.454413	High pH	Bacteria	Actinobacteria	Actinobacteria	Actinomycetales	Nocardioidaceae
999	B_OTU7376	0.0231328	0.988889	0.356413	High pH	Bacteria	Actinobacteria	Thermoleophilia	Solirubrobacterales	Conexibacteraceae
1000	B_OTU6723	0.00334605	0.611111	0.454296	High pH	Bacteria	Proteobacteria	Alphaproteobacteria	Rhodospirillales	Rhodospirillaceae	Skermanella
1001	B_OTU7808	0.00376368	0.622222	0.402296	High pH	Bacteria	Proteobacteria	Deltaproteobacteria	Myxococcales
1003	B_OTU57675	0.00624169	0.644444	0.319888	High pH	Bacteria	Bacteroidetes	Cytophagia	Cytophagales	Cytophagaceae
1007	B_OTU4157	0.00395696	0.655556	0.316692	High pH	Bacteria	Planctomycetes	Phycisphaerae	WD2101
1008	B_OTU9712	0.00501862	0.644444	0.255513	High pH	Bacteria	Acidobacteria	[Chloracidobacteria]	PK29
1009	B_OTU10416	0.00472902	0.733333	0.373878	High pH	Bacteria	Gemmatimonadetes	Gemmatimonadetes	C114
1012	B_OTU7060	0.00672382	0.833333	0.398486	High pH	Bacteria	Proteobacteria	Betaproteobacteria	Burkholderiales
1013	B_OTU7277	0.00341037	0.6	0.360124	High pH	Bacteria	Actinobacteria	Actinobacteria	Actinomycetales	Nocardioidaceae
1015	B_OTU2997	0.00961923	0.888889	0.433739	High pH	Bacteria	Proteobacteria	Alphaproteobacteria	Ellin329
1017	B_OTU8834	0.0183061	0.933333	0.352707	High pH	Bacteria	Proteobacteria	Gammaproteobacteria	Xanthomonadales	Xanthomonadaceae	Lysobacter
1019	B_OTU8353	0.0069812	0.744444	0.33132	High pH	Bacteria	Proteobacteria	Deltaproteobacteria	Myxococcales
1021	F_OTU3358	0.0675332	0.977778	0.300698	High pH	Fungi	Ascomycota	Dothideomycetes	Pleosporales	Incertae sedis
1022	B_OTU5027	0.00556533	0.677778	0.44628	High pH	Bacteria	Nitrospirae	Nitrospira	Nitrospirales	Nitrospiraceae	Nitrospira
1023	B_OTU7486	0.0103271	0.866667	0.232412	High pH	Bacteria	Proteobacteria	Alphaproteobacteria	Sphingomonadales	Sphingomonadaceae	Kaistobacter
1024	B_OTU66741	0.00791437	0.822222	0.539071	High pH	Bacteria	Chloroflexi	Thermomicrobia	JG30-KF-CM45
1027	B_OTU6821	0.00968377	0.911111	0.524499	High pH	Bacteria	Proteobacteria	Alphaproteobacteria	Rhodospirillales	Rhodospirillaceae
1028	B_OTU8655	0.0250309	0.988889	0.368831	High pH	Bacteria	WS3	PRR-12	Sediment-1	PRR-10
1037	B_OTU2457	0.00624117	0.733333	0.427062	High pH	Bacteria	Armatimonadetes	0319-6E2
1045	B_OTU70710	0.00566225	0.7	0.502598	High pH	Bacteria	Gemmatimonadetes	Gemmatimonadetes
1046	B_OTU8249	0.00730298	0.833333	0.409414	High pH	Bacteria	Proteobacteria	Deltaproteobacteria	Syntrophobacterales	Syntrophobacteraceae
1047	B_OTU4747	0.0115499	0.922222	0.325936	High pH	Bacteria	Acidobacteria	iii1-8	DS-18
1048	B_OTU10147	0.00469681	0.733333	0.423572	High pH	Bacteria	Chloroflexi	Ellin6529
1049	F_OTU2609	0.129661	0.922222	0.298029	High pH	Fungi	Ascomycota	Dothideomycetes	Incertae sedis	Pseudeurotiaceae	Pseudogymnoascus	Pseudogymnoascus roseus
1053	B_OTU3439	0.00817158	0.844444	0.440402	High pH	Bacteria	Chloroflexi	Anaerolineae	SBR1031	A4b
1054	B_OTU7609	0.0103914	0.9	0.472164	High pH	Bacteria	Actinobacteria	Actinobacteria	Actinomycetales	Micromonosporaceae	Catellatospora
1055	B_OTU5655	0.010874	0.911111	0.356547	High pH	Bacteria	Firmicutes	Bacilli	Bacillales	Paenibacillaceae	Paenibacillus
1061	B_OTU7943	0.0147994	0.966667	0.230111	High pH	Bacteria	Proteobacteria	Gammaproteobacteria	Xanthomonadales	Sinobacteraceae
1063	B_OTU817	0.00630557	0.8	0.423202	High pH	Bacteria	Acidobacteria	Solibacteres	Solibacterales
1064	B_OTU6575	0.00572634	0.722222	0.382795	High pH	Bacteria	Gemmatimonadetes	Gemm-1
1066	B_OTU10218	0.00826824	0.688889	0.331528	High pH	Bacteria	Actinobacteria	Rubrobacteria	Rubrobacterales	Rubrobacteraceae
1067	B_OTU6552	0.0179846	1	0.404416	High pH	Bacteria	WS3	PRR-12	Sediment-1	PRR-10
1070	F_OTU2285	0.165117	1	0.386974	High pH	Fungi	Ascomycota	Incertae sedis	Incertae sedis	Incertae sedis	Staphylotrichum	Staphylotrichum sp
1072	B_OTU11341	0.0148958	0.988889	0.438898	High pH	Bacteria	Actinobacteria	Thermoleophilia	Gaiellales	Gaiellaceae
1076	F_OTU2556	0.0709114	0.966667	0.282644	High pH	Fungi	Ascomycota	Sordariomycetes	Sordariales	Lasiosphaeriaceae	Podospora	Podospora dimorpha
1077	B_OTU8172	0.00505115	0.744444	0.451865	High pH	Bacteria	Planctomycetes	OM190	CL500-15
1078	B_OTU5145	0.0120967	0.955556	0.330843	High pH	Bacteria	Proteobacteria	Alphaproteobacteria	Rhizobiales
1079	B_OTU4526	0.025739	0.966667	0.286362	High pH	Bacteria	Chloroflexi	Gitt-GS-136
1081	B_OTU54973	0.0111317	0.788889	0.313893	High pH	Bacteria	Proteobacteria	Alphaproteobacteria	Rhodospirillales
1082	B_OTU3575	0.00424689	0.644444	0.223542	High pH	Bacteria	Actinobacteria	Actinobacteria	Actinomycetales	Microbacteriaceae	Microbacterium
1083	B_OTU4482	0.00575862	0.777778	0.311441	High pH	Bacteria	Actinobacteria	Actinobacteria	Actinomycetales	Micrococcaceae	Arthrobacter	psychrolactophilus
1084	B_OTU7668	0.00524449	0.688889	0.364879	High pH	Bacteria	Planctomycetes	Phycisphaerae	Phycisphaerales
1086	B_OTU3259	0.0130298	0.911111	0.344935	High pH	Bacteria	Proteobacteria	Alphaproteobacteria	Rhizobiales	Phyllobacteriaceae	Phyllobacterium
1088	B_OTU63511	0.00495452	0.677778	0.466711	High pH	Bacteria	Acidobacteria	Sva0725	Sva0725
1091	B_OTU521	0.0103913	0.911111	0.503964	High pH	Bacteria	Proteobacteria	Alphaproteobacteria	Rhizobiales	Hyphomicrobiaceae	Rhodoplanes
1098	B_OTU57235	0.0048906	0.733333	0.433407	High pH	Bacteria	Proteobacteria	Alphaproteobacteria	Rhodobacterales	Rhodobacteraceae	Antarcticicola	litoralis
1100	F_OTU2330	0.0257714	0.933333	0.323984	High pH	Fungi	Zygomycota	Incertae sedis	Mortierellales	Mortierellaceae	Mortierella	Mortierella sp
1101	B_OTU7707	0.024323	0.977778	0.341555	High pH	Bacteria	Proteobacteria	Alphaproteobacteria	Caulobacterales	Caulobacteraceae	Mycoplana
1102	B_OTU781	0.00386058	0.622222	0.40903	High pH	Bacteria	Verrucomicrobia	Opitutae	Opitutales	Opitutaceae	Opitutus
1104	B_OTU71141	0.00598449	0.677778	0.417912	High pH	Bacteria	Proteobacteria	Alphaproteobacteria	Rhodobacterales	Rhodobacteraceae	Amaricoccus
1106	B_OTU4910	0.00614482	0.744444	0.299334	High pH	Bacteria	Firmicutes	Bacilli	Bacillales	Bacillaceae	Bacillus
1107	B_OTU7995	0.00710998	0.777778	0.286941	High pH	Bacteria	Bacteroidetes	Cytophagia	Cytophagales	Cytophagaceae	Adhaeribacter
1108	B_OTU10423	0.00511561	0.733333	0.472607	High pH	Bacteria	Planctomycetes	Planctomycetia	Gemmatales	Gemmataceae	Gemmata
1109	F_OTU3113	0.0269938	0.922222	0.356206	High pH	Fungi	Ascomycota	Pezizomycetes	Pezizales	Incertae sedis	Cephaliophora	Cephaliophora tropica
1114	B_OTU11147	0.0141238	0.944444	0.383724	High pH	Bacteria	Chloroflexi	Thermomicrobia	JG30-KF-CM45
1117	B_OTU564	0.00759243	0.855556	0.492805	High pH	Bacteria	WS3	PRR-12	Sediment-1
1118	B_OTU5001	0.0167301	0.988889	0.298133	High pH	Bacteria	Proteobacteria	Alphaproteobacteria	Sphingomonadales	Sphingomonadaceae
1119	B_OTU7525	0.00456822	0.633333	0.410052	High pH	Bacteria	Actinobacteria	Actinobacteria	Actinomycetales	Microbacteriaceae	Mycetocola
1120	B_OTU58805	0.00382876	0.655556	0.419914	High pH	Bacteria	Proteobacteria	Alphaproteobacteria	Rhodospirillales
1121	B_OTU10724	0.00582315	0.722222	0.333709	High pH	Bacteria	Proteobacteria	Alphaproteobacteria	Rhizobiales	Bradyrhizobiaceae
1122	B_OTU6707	0.00604836	0.777778	0.38669	High pH	Bacteria
1127	B_OTU7648	0.0083321	0.911111	0.511952	High pH	Bacteria	Proteobacteria	Alphaproteobacteria	Rhizobiales	Rhodobiaceae	Afifella
1129	F_OTU2295	0.0147674	0.8	0.256954	High pH	Fungi	Ascomycota	Eurotiomycetes	Chaetothyriales	Chaetothyriaceae	Cyphellophora	Cyphellophora suttonii
1131	B_OTU8957	0.0331713	1	0.411686	High pH	Bacteria	Actinobacteria	Thermoleophilia	Gaiellales	Gaiellaceae
1134	B_OTU70934	0.00817147	0.855556	0.45722	High pH	Bacteria	Chloroflexi	Thermomicrobia	JG30-KF-CM45
1135	F_OTU3335	0.0126113	0.977778	0.324689	High pH	Fungi	Ascomycota	Sordariomycetes	Microascales
1136	B_OTU7865	0.0147997	0.888889	0.288258	High pH	Bacteria	Nitrospirae	Nitrospira	Nitrospirales	0319-6A21
1140	B_OTU8398	0.00591957	0.744444	0.426888	High pH	Bacteria	Chloroflexi	Chloroflexi	[Roseiflexales]
1141	B_OTU7103	0.0119359	0.866667	0.258902	High pH	Bacteria	Actinobacteria	Thermoleophilia	Gaiellales	Gaiellaceae
1142	B_OTU58867	0.00698148	0.755556	0.236461	High pH	Bacteria	Chloroflexi	C0119
1143	B_OTU2535	0.00546911	0.766667	0.472357	High pH	Bacteria	Acidobacteria	Acidobacteria-6	iii1-15
1144	B_OTU6487	0.0106813	0.8	0.400238	High pH	Bacteria	Bacteroidetes	Cytophagia	Cytophagales	Cytophagaceae	Pontibacter
1145	B_OTU8883	0.0295996	0.988889	0.448408	High pH	Bacteria	Chloroflexi	Thermomicrobia
1146	F_OTU3724	0.0069495	0.7	0.313952	High pH	Fungi	Ascomycota	Dothideomycetes	Pleosporales
1147	B_OTU8848	0.00492232	0.633333	0.271379	High pH	Bacteria	Proteobacteria	Alphaproteobacteria	Rhizobiales	Phyllobacteriaceae
1150	B_OTU2871	0.00463291	0.7	0.385805	High pH	Bacteria	Gemmatimonadetes	Gemm-1
1151	B_OTU6678	0.0110351	0.922222	0.52305	High pH	Bacteria	Proteobacteria	Deltaproteobacteria	Myxococcales	Myxococcaceae
1153	B_OTU2149	0.00633804	0.8	0.490982	High pH	Bacteria	Planctomycetes	Planctomycetia	Pirellulales	Pirellulaceae
1154	B_OTU4326	0.00598421	0.722222	0.343262	High pH	Bacteria	Verrucomicrobia	[Pedosphaerae]	[Pedosphaerales]
1155	B_OTU60	0.0270901	1	0.545685	High pH	Bacteria	Actinobacteria	Actinobacteria	Actinomycetales	Geodermatophilaceae
1159	B_OTU8051	0.00357111	0.588889	0.324329	High pH	Bacteria	Gemmatimonadetes	Gemmatimonadetes	Ellin5290
1160	B_OTU8368	0.00916909	0.855556	0.392182	High pH	Bacteria	Proteobacteria	Alphaproteobacteria	Rhodobacterales	Hyphomonadaceae
1161	B_OTU65490	0.00637032	0.7	0.397104	High pH	Bacteria	Acidobacteria	Acidobacteria-6	iii1-15
1163	B_OTU7127	0.00826811	0.888889	0.406724	High pH	Bacteria	Actinobacteria	Actinobacteria	Actinomycetales	Nocardioidaceae
1164	B_OTU7503	0.00431099	0.622222	0.470438	High pH	Bacteria	Proteobacteria	Deltaproteobacteria	Myxococcales
1168	B_OTU4267	0.00649897	0.744444	0.258765	High pH	Bacteria	Actinobacteria	Actinobacteria	Actinomycetales	Nocardioidaceae
1173	B_OTU57367	0.00540495	0.666667	0.463007	High pH	Bacteria	Chloroflexi	Thermomicrobia	JG30-KF-CM45
1174	B_OTU5391	0.00482567	0.7	0.399754	High pH	Bacteria	Acidobacteria	[Chloracidobacteria]	DS-100
1175	B_OTU62705	0.00942606	0.922222	0.46154	High pH	Bacteria	Proteobacteria	Deltaproteobacteria	Syntrophobacterales	Syntrophobacteraceae
1178	B_OTU6169	0.00865409	0.866667	0.438751	High pH	Bacteria	Acidobacteria	Sva0725	Sva0725
1180	B_OTU8790	0.00894378	0.844444	0.490373	High pH	Bacteria	Actinobacteria	Actinobacteria	Actinomycetales	Nocardioidaceae
1181	B_OTU4420	0.00440792	0.588889	0.319005	High pH	Bacteria	Acidobacteria	Sva0725	Sva0725
1182	B_OTU74514	0.00752776	0.8	0.484383	High pH	Bacteria	Acidobacteria	Sva0725	Sva0725
1183	B_OTU9736	0.00665961	0.788889	0.60408	High pH	Bacteria	Planctomycetes	Planctomycetia	Pirellulales	Pirellulaceae	Pirellula
1184	B_OTU62177	0.00344239	0.588889	0.565794	High pH	Bacteria	Chloroflexi	Thermomicrobia	JG30-KF-CM45
1186	B_OTU11034	0.00923351	0.866667	0.668557	High pH	Bacteria	Planctomycetes	Planctomycetia	Pirellulales	Pirellulaceae
1187	B_OTU5753	0.0956855	1	0.420193	High pH	Bacteria	Proteobacteria	Gammaproteobacteria	Xanthomonadales	Xanthomonadaceae	Thermomonas
1189	B_OTU63449	0.0058552	0.7	0.321939	High pH	Bacteria	Bacteroidetes	Cytophagia	Cytophagales	Cytophagaceae
1190	B_OTU8310	0.0222639	1	0.365812	High pH	Bacteria	Proteobacteria	Betaproteobacteria
1191	B_OTU66443	0.00405405	0.633333	0.370155	High pH	Bacteria	Chloroflexi	Anaerolineae	DRC31
1192	B_OTU10660	0.0176629	0.988889	0.598341	High pH	Bacteria	Acidobacteria	Solibacteres	Solibacterales
1193	B_OTU69485	0.00456846	0.655556	0.495148	High pH	Bacteria	Chloroflexi	Thermomicrobia	JG30-KF-CM45
1195	F_OTU4116	0.028538	0.955556	0.369747	High pH	Fungi	Ascomycota	Eurotiomycetes	Eurotiales	Trichocomaceae	Paecilomyces	Paecilomyces marquandii
1196	B_OTU71947	0.00450403	0.6	0.503039	High pH	Bacteria	Chloroflexi	Thermomicrobia	JG30-KF-CM45
1197	B_OTU3056	0.00817135	0.833333	0.454693	High pH	Bacteria	Proteobacteria	Gammaproteobacteria	Xanthomonadales	Sinobacteraceae	Steroidobacter
1198	B_OTU2196	0.00813939	0.811111	0.431732	High pH	Bacteria	Actinobacteria	Thermoleophilia	Gaiellales	Gaiellaceae
1202	B_OTU6637	0.00537249	0.722222	0.443983	High pH	Bacteria	Proteobacteria	Alphaproteobacteria	Rhodobacterales	Hyphomonadaceae
1206	B_OTU8278	0.00633792	0.755556	0.335777	High pH	Bacteria	Proteobacteria	Gammaproteobacteria	Xanthomonadales	Sinobacteraceae
1207	B_OTU8269	0.0384801	1	0.68509	High pH	Bacteria	Proteobacteria	Gammaproteobacteria	Xanthomonadales	Sinobacteraceae	Steroidobacter
1208	B_OTU54669	0.00656272	0.722222	0.329266	High pH	Bacteria	Acidobacteria	Acidobacteria-6	iii1-15
1210	B_OTU10636	0.0198831	0.977778	0.572194	High pH	Bacteria	Proteobacteria	Betaproteobacteria
1211	B_OTU3159	0.0213309	0.988889	0.570794	High pH	Bacteria	Acidobacteria	Sva0725	Sva0725
1213	B_OTU6259	0.00685295	0.811111	0.529557	High pH	Bacteria	Planctomycetes	Planctomycetia	Planctomycetales	Planctomycetaceae	Planctomyces
1214	B_OTU56717	0.00476122	0.611111	0.399408	High pH	Bacteria	Proteobacteria	Alphaproteobacteria	Rhodobacterales	Rhodobacteraceae	Amaricoccus
1216	B_OTU7076	0.0142522	0.966667	0.449096	High pH	Bacteria	Proteobacteria	Betaproteobacteria	Burkholderiales	Comamonadaceae	Rubrivivax
1217	B_OTU232	0.00424677	0.633333	0.380521	High pH	Bacteria	Chloroflexi	SAR202
1218	B_OTU10506	0.00617666	0.844444	0.465919	High pH	Bacteria	Proteobacteria	Deltaproteobacteria	Myxococcales
1219	F_OTU2252	0.0781185	0.988889	0.465932	High pH	Fungi	Ascomycota	Sordariomycetes	Hypocreales	Incertae sedis
1222	B_OTU10797	0.00685311	0.777778	0.403125	High pH	Bacteria	Gemmatimonadetes	Gemm-5
1223	B_OTU70680	0.00801087	0.866667	0.520226	High pH	Bacteria	Acidobacteria	Sva0725	Sva0725
1226	B_OTU8039	0.0329784	1	0.475603	High pH	Bacteria	Actinobacteria	Actinobacteria	Actinomycetales	Pseudonocardiaceae	Pseudonocardia	halophobica
1227	B_OTU6320	0.149062	1	0.535587	High pH	Bacteria	Gemmatimonadetes	Gemm-1
1229	B_OTU59273	0.00492236	0.711111	0.421677	High pH	Bacteria	Planctomycetes	OM190	agg27
1231	B_OTU2121	0.0159898	0.933333	0.3547	High pH	Bacteria	Gemmatimonadetes	Gemmatimonadetes
1232	B_OTU9701	0.00865443	0.822222	0.506289	High pH	Bacteria	Acidobacteria	Acidobacteria-6	CCU21
1233	B_OTU3013	0.0120327	0.866667	0.360393	High pH	Bacteria	WS3	PRR-12	Sediment-1
1235	B_OTU3406	0.00900799	0.933333	0.509077	High pH	Bacteria	Proteobacteria	Alphaproteobacteria	Rhizobiales	Bradyrhizobiaceae
1236	B_OTU4425	0.0247737	0.977778	0.667159	High pH	Bacteria	Proteobacteria	Deltaproteobacteria	NB1-j
1237	B_OTU8373	0.0100379	0.933333	0.522906	High pH	Bacteria	Acidobacteria	Sva0725	Sva0725
1240	B_OTU2965	0.0599079	1	0.730366	High pH	Bacteria	Acidobacteria	Acidobacteria-6	iii1-15
1241	F_OTU2311	0.163508	0.977778	0.26465	High pH	Fungi	Ascomycota	Sordariomycetes
1242	B_OTU3126	0.0118075	0.933333	0.572251	High pH	Bacteria	Actinobacteria	Actinobacteria	Actinomycetales	Actinosynnemataceae	Lentzea	albidocapillata
1243	B_OTU10806	0.00595192	0.711111	0.518288	High pH	Bacteria	Acidobacteria	Acidobacteria-6	iii1-15
1244	B_OTU6260	0.00752806	0.877778	0.543095	High pH	Bacteria	Acidobacteria	Acidobacteria-6	CCU21
1246	B_OTU63162	0.00501872	0.777778	0.490755	High pH	Bacteria	Actinobacteria	Acidimicrobiia	Acidimicrobiales
1247	B_OTU2162	0.00608036	0.811111	0.50868	High pH	Bacteria	Proteobacteria	Alphaproteobacteria	Rhodospirillales	Rhodospirillaceae
1252	B_OTU56435	0.00871821	0.866667	0.465752	High pH	Bacteria	Gemmatimonadetes	Gemm-1
1255	B_OTU3663	0.055307	1	0.738644	High pH	Bacteria	Proteobacteria	Betaproteobacteria	SC-I-84
1256	B_OTU9109	0.00710983	0.822222	0.503442	High pH	Bacteria	Proteobacteria	Deltaproteobacteria	Myxococcales
1257	B_OTU4240	0.0197221	0.955556	0.251115	High pH	Bacteria	Actinobacteria	Actinobacteria	Actinomycetales	Actinosynnemataceae	Lentzea	albidocapillata
1258	B_OTU7910	0.0159899	0.955556	0.5559	High pH	Bacteria	Planctomycetes	Planctomycetia	Pirellulales	Pirellulaceae
1259	B_OTU7527	0.0209447	0.966667	0.70581	High pH	Bacteria	Proteobacteria	Deltaproteobacteria	Syntrophobacterales	Syntrophobacteraceae
1260	B_OTU778	0.0243231	1	0.721555	High pH	Bacteria	Acidobacteria	Acidobacteria-6	iii1-15	mb2424
1261	B_OTU3175	0.0788906	1	0.40948	High pH	Bacteria	Proteobacteria	Gammaproteobacteria	Xanthomonadales	Xanthomonadaceae	Lysobacter
1262	B_OTU5197	0.0156359	0.922222	0.547505	High pH	Bacteria	Proteobacteria	Deltaproteobacteria	Myxococcales
1265	B_OTU6222	0.00894357	0.888889	0.515441	High pH	Bacteria	Proteobacteria	Deltaproteobacteria	Syntrophobacterales	Syntrophobacteraceae
1266	B_OTU65364	0.0101665	0.811111	0.456833	High pH	Bacteria	Bacteroidetes	Cytophagia	Cytophagales	Cytophagaceae	Pontibacter
1267	B_OTU4505	0.0765097	1	0.575531	High pH	Bacteria	Bacteroidetes	Cytophagia	Cytophagales	Cytophagaceae
1270	B_OTU66314	0.00656319	0.633333	0.414393	High pH	Bacteria	Proteobacteria	Deltaproteobacteria	[Entotheonellales]	[Entotheonellaceae]
1271	B_OTU7756	0.0122901	0.888889	0.436117	High pH	Bacteria	Actinobacteria	Acidimicrobiia	Acidimicrobiales	EB1017
1272	B_OTU59258	0.0186279	0.966667	0.647924	High pH	Bacteria	Chloroflexi	Ellin6529
1273	B_OTU7633	0.0578489	1	0.236882	High pH	Bacteria	Proteobacteria	Gammaproteobacteria	Xanthomonadales	Xanthomonadaceae	Lysobacter
1274	B_OTU9574	0.00939399	0.822222	0.370556	High pH	Bacteria	Proteobacteria	Gammaproteobacteria	Xanthomonadales	Xanthomonadaceae	Lysobacter
1275	B_OTU7977	0.00482573	0.633333	0.406888	High pH	Bacteria	Acidobacteria	Sva0725	Sva0725
1276	B_OTU9217	0.00630572	0.733333	0.51575	High pH	Bacteria	Gemmatimonadetes	Gemmatimonadetes	KD8-87
1277	B_OTU8233	0.0336217	1	0.596223	High pH	Bacteria	Actinobacteria	Actinobacteria	Actinomycetales	Nocardioidaceae	Nocardioides
1278	B_OTU54582	0.00881493	0.855556	0.35751	High pH	Bacteria	Bacteroidetes	[Saprospirae]	[Saprospirales]	Chitinophagaceae
1279	B_OTU4256	0.063608	1	0.7274	High pH	Bacteria	Acidobacteria	Acidobacteria-6	iii1-15	mb2424
1281	B_OTU1628	0.200444	1	0.580722	High pH	Bacteria	Chloroflexi	Ellin6529
1283	B_OTU3124	0.0300502	1	0.612352	High pH	Bacteria	Acidobacteria	Acidobacteria-6	iii1-15	RB40
1287	B_OTU2928	0.00601621	0.711111	0.478404	High pH	Bacteria	Acidobacteria	Acidobacteria-6	iii1-15
1288	B_OTU831	0.0508993	1	0.527036	High pH	Bacteria	Proteobacteria	Gammaproteobacteria	Xanthomonadales	Xanthomonadaceae	Arenimonas
1289	F_OTU2466	0.103278	0.988889	0.60353	High pH	Fungi	Ascomycota	Sordariomycetes	Microascales	unidentified	unidentified	Microascales sp
1290	B_OTU3441	0.00759223	0.855556	0.56042	High pH	Bacteria	Chloroflexi	Ellin6529
1291	B_OTU5913	0.30813	1	0.758841	High pH	Bacteria	Acidobacteria	Acidobacteria-6	iii1-15
1293	B_OTU6213	0.0470062	1	0.682385	High pH	Bacteria	Proteobacteria	Gammaproteobacteria	Xanthomonadales	Sinobacteraceae
1294	B_OTU2665	0.0179848	0.933333	0.739875	High pH	Bacteria	Proteobacteria	Deltaproteobacteria	NB1-j
1297	B_OTU57860	0.0172127	0.933333	0.56338	High pH	Bacteria	Acidobacteria	RB25
1298	B_OTU20937	0.0509636	1	0.528162	High pH	Bacteria	Proteobacteria	Betaproteobacteria	Burkholderiales	Comamonadaceae	Rubrivivax
1300	B_OTU8386	0.0405391	1	0.526715	High pH	Bacteria	Actinobacteria	Thermoleophilia	Solirubrobacterales
1302	B_OTU4335	0.107783	1	0.462466	High pH	Bacteria	Proteobacteria	Betaproteobacteria	MND1
1304	B_OTU7402	0.0227466	0.988889	0.468802	High pH	Bacteria	Proteobacteria	Gammaproteobacteria	Xanthomonadales	Sinobacteraceae
1310	B_OTU3224	0.177214	1	0.46596	High pH	Bacteria	Proteobacteria	Gammaproteobacteria	Xanthomonadales	Sinobacteraceae
1311	B_OTU5839	0.0348442	1	0.724166	High pH	Bacteria	Actinobacteria	Acidimicrobiia	Acidimicrobiales	Iamiaceae	Iamia
1315	B_OTU8627	0.0235189	1	0.468791	High pH	Bacteria	Proteobacteria	Betaproteobacteria
1316	B_OTU7246	0.323992	1	0.666401	High pH	Bacteria	Acidobacteria	Acidobacteria-6	iii1-15
3	B_OTU5486	0.0527328	0.966667	-0.5923	Low pH	Bacteria	Acidobacteria	Acidobacteriia	Acidobacteriales	Koribacteraceae	Candidatus Koribacter
4	B_OTU615	0.0134164	0.8	-0.737204	Low pH	Bacteria	Proteobacteria	Alphaproteobacteria	Rhodospirillales	Rhodospirillaceae
5	B_OTU844	0.11544	1	-0.767889	Low pH	Bacteria	Actinobacteria	Thermoleophilia	Gaiellales	Gaiellaceae
6	B_OTU68253	0.00965165	0.666667	-0.674842	Low pH	Bacteria	Chloroflexi	Ktedonobacteria	Elev-1554
11	B_OTU3682	0.058878	1	-0.727082	Low pH	Bacteria	Proteobacteria	Alphaproteobacteria	Rhizobiales	Hyphomicrobiaceae	Rhodoplanes
12	B_OTU4759	0.0121615	0.677778	-0.536906	Low pH	Bacteria	Proteobacteria	Gammaproteobacteria	Xanthomonadales	Sinobacteraceae
16	B_OTU1362	0.0175345	0.866667	-0.616309	Low pH	Bacteria	Proteobacteria	Alphaproteobacteria	Ellin329
18	B_OTU7421	0.298607	1	-0.769261	Low pH	Bacteria	Actinobacteria	Thermoleophilia	Gaiellales	Gaiellaceae
19	B_OTU2148	0.0182421	0.866667	-0.67604	Low pH	Bacteria	Actinobacteria	Actinobacteria	Actinomycetales	Frankiaceae
20	B_OTU8080	0.0425337	0.977778	-0.69656	Low pH	Bacteria	Proteobacteria	Betaproteobacteria	Burkholderiales	Burkholderiaceae	Burkholderia
21	B_OTU8578	0.0136735	0.8	-0.690884	Low pH	Bacteria	Actinobacteria	Actinobacteria	Actinomycetales
28	B_OTU1382	0.0142527	0.844444	-0.59826	Low pH	Bacteria	Proteobacteria	Alphaproteobacteria	Ellin329
33	B_OTU676	0.0301788	0.922222	-0.74819	Low pH	Bacteria	Proteobacteria	Betaproteobacteria	Burkholderiales	Burkholderiaceae	Burkholderia
34	B_OTU9904	0.0286664	0.822222	-0.591635	Low pH	Bacteria	Actinobacteria	Thermoleophilia	Gaiellales	Gaiellaceae
35	B_OTU505	0.0400563	0.911111	-0.529425	Low pH	Bacteria	Proteobacteria	Gammaproteobacteria	Xanthomonadales	Sinobacteraceae
42	B_OTU58071	0.0257068	0.888889	-0.547802	Low pH	Bacteria	Actinobacteria	Actinobacteria	Actinomycetales
43	B_OTU5470	0.0215562	0.833333	-0.571285	Low pH	Bacteria	Acidobacteria	Acidobacteriia	Acidobacteriales	Koribacteraceae
44	B_OTU8743	0.0358092	0.977778	-0.696456	Low pH	Bacteria	Acidobacteria	Acidobacteriia	Acidobacteriales	Acidobacteriaceae
47	B_OTU60736	0.0498695	0.966667	-0.453262	Low pH	Bacteria	Gemmatimonadetes	Gemmatimonadetes
49	B_OTU74260	0.0387375	0.755556	-0.581116	Low pH	Bacteria	Chloroflexi	Ktedonobacteria	JG30-KF-AS9
50	F_OTU2703	0.10701	0.955556	-0.493956	Low pH	Fungi	Ascomycota	Eurotiomycetes	Chaetothyriales	Herpotrichiellaceae	Exophiala	Exophiala equina
51	B_OTU62547	0.0111966	0.722222	-0.533836	Low pH	Bacteria	Actinobacteria	Thermoleophilia	Gaiellales	Gaiellaceae
54	B_OTU3443	0.0196903	0.866667	-0.702545	Low pH	Bacteria	Proteobacteria	Gammaproteobacteria	Xanthomonadales	Sinobacteraceae
55	B_OTU5215	0.0181781	0.822222	-0.579281	Low pH	Bacteria	Proteobacteria	Betaproteobacteria
56	B_OTU1817	0.0192393	0.866667	-0.561143	Low pH	Bacteria	Actinobacteria	Actinobacteria	Actinomycetales	Frankiaceae
58	B_OTU6102	0.0650877	1	-0.684958	Low pH	Bacteria	Actinobacteria	Thermoleophilia	Gaiellales	Gaiellaceae
59	B_OTU981	0.0154107	0.844444	-0.648788	Low pH	Bacteria	Proteobacteria	Alphaproteobacteria	Caulobacterales	Caulobacteraceae	Phenylobacterium
60	B_OTU1547	0.286445	1	-0.790487	Low pH	Bacteria	Actinobacteria	Thermoleophilia	Gaiellales	Gaiellaceae
62	B_OTU3756	0.0143169	0.722222	-0.564738	Low pH	Bacteria	Actinobacteria	Actinobacteria	Actinomycetales	Mycobacteriaceae	Mycobacterium	celatum
64	B_OTU7615	0.0138345	0.844444	-0.564439	Low pH	Bacteria	Actinobacteria	Actinobacteria	Actinomycetales	Mycobacteriaceae	Mycobacterium
68	B_OTU1618	0.0185962	0.844444	-0.55425	Low pH	Bacteria	Actinobacteria	Thermoleophilia	Solirubrobacterales	Conexibacteraceae
70	B_OTU4918	0.0079791	0.666667	-0.666803	Low pH	Bacteria	Planctomycetes	Planctomycetia	Gemmatales	Gemmataceae
72	B_OTU8212	0.180754	1	-0.635409	Low pH	Bacteria	Proteobacteria	Alphaproteobacteria	Rhizobiales	Bradyrhizobiaceae	Bradyrhizobium
73	B_OTU2552	0.0605511	0.988889	-0.657566	Low pH	Bacteria	Acidobacteria	Acidobacteriia	Acidobacteriales	Acidobacteriaceae
76	B_OTU8647	0.0105851	0.722222	-0.631519	Low pH	Bacteria	Acidobacteria	Solibacteres	Solibacterales	Solibacteraceae
77	B_OTU1852	0.0371286	0.988889	-0.744992	Low pH	Bacteria	Actinobacteria	Thermoleophilia	Gaiellales	Gaiellaceae
79	B_OTU7275	0.0157325	0.788889	-0.643948	Low pH	Bacteria	Actinobacteria	Actinobacteria	Actinomycetales
82	B_OTU1806	0.0689487	0.988889	-0.612634	Low pH	Bacteria	Proteobacteria	Gammaproteobacteria	Xanthomonadales	Xanthomonadaceae
84	B_OTU58646	0.0129982	0.733333	-0.634514	Low pH	Bacteria	Chloroflexi	Thermomicrobia	JG30-KF-CM45
85	B_OTU10861	0.0321413	0.888889	-0.346788	Low pH	Bacteria	Planctomycetes	Phycisphaerae	WD2101
86	B_OTU9120	0.0799844	0.988889	-0.544469	Low pH	Bacteria	Proteobacteria	Gammaproteobacteria	Xanthomonadales	Xanthomonadaceae	Dokdonella
89	B_OTU1570	0.0711362	0.988889	-0.557042	Low pH	Bacteria	Proteobacteria	Betaproteobacteria	A21b	EB1003
92	B_OTU11154	0.00871879	0.633333	-0.554248	Low pH	Bacteria	Proteobacteria	Alphaproteobacteria	Sphingomonadales	Sphingomonadaceae	Kaistobacter
95	B_OTU1789	0.00939462	0.655556	-0.565174	Low pH	Bacteria	Proteobacteria	Alphaproteobacteria	Rhodospirillales	Acetobacteraceae
96	B_OTU59975	0.0134806	0.722222	-0.660446	Low pH	Bacteria	Chloroflexi	Thermomicrobia
97	B_OTU3662	0.0139634	0.777778	-0.610444	Low pH	Bacteria	Acidobacteria	Solibacteres	Solibacterales
100	B_OTU1990	0.0193364	0.822222	-0.679468	Low pH	Bacteria	Acidobacteria	Acidobacteriia	Acidobacteriales	Koribacteraceae
101	B_OTU1341	0.0102957	0.744444	-0.564208	Low pH	Bacteria	Actinobacteria	Thermoleophilia	Gaiellales	Gaiellaceae
103	B_OTU1117	0.00704603	0.722222	-0.583837	Low pH	Bacteria	Actinobacteria	Actinobacteria	Actinomycetales	Frankiaceae
106	B_OTU5305	0.0318514	0.911111	-0.645305	Low pH	Bacteria	Acidobacteria	Solibacteres	Solibacterales
107	B_OTU2001	0.00913687	0.777778	-0.72628	Low pH	Bacteria	Actinobacteria	Thermoleophilia	Gaiellales	Gaiellaceae
108	B_OTU7182	0.0221999	0.888889	-0.684288	Low pH	Bacteria	Actinobacteria	Thermoleophilia	Solirubrobacterales	Patulibacteraceae
109	B_OTU7152	0.06882	1	-0.766907	Low pH	Bacteria	Actinobacteria	Thermoleophilia	Gaiellales
112	B_OTU1868	0.0351981	0.911111	-0.663904	Low pH	Bacteria	Actinobacteria	Thermoleophilia	Gaiellales
113	B_OTU1327	0.0138665	0.822222	-0.606436	Low pH	Bacteria	Proteobacteria	Alphaproteobacteria	Ellin329
114	B_OTU7794	0.015411	0.877778	-0.643123	Low pH	Bacteria	Actinobacteria	Actinobacteria	Actinomycetales	Actinospicaceae
115	B_OTU8062	0.0434985	0.966667	-0.72704	Low pH	Bacteria	Actinobacteria	Actinobacteria	Actinomycetales	Frankiaceae
116	B_OTU57165	0.00961975	0.777778	-0.562644	Low pH	Bacteria	Proteobacteria	Gammaproteobacteria
117	B_OTU58124	0.0190467	0.766667	-0.597301	Low pH	Bacteria	Chloroflexi	Thermomicrobia	JG30-KF-CM45
118	B_OTU66354	0.016859	0.711111	-0.558766	Low pH	Bacteria	Chloroflexi	SHA-26
121	B_OTU1741	0.0135768	0.788889	-0.636322	Low pH	Bacteria	Acidobacteria	Acidobacteriia	Acidobacteriales	Koribacteraceae
127	B_OTU3181	0.0282803	0.811111	-0.535031	Low pH	Bacteria	Actinobacteria	Actinobacteria	Actinomycetales
128	B_OTU1339	0.207618	0.988889	-0.634724	Low pH	Bacteria	Chloroflexi	Ktedonobacteria	JG30-KF-AS9
130	B_OTU2119	0.0204298	0.933333	-0.695602	Low pH	Bacteria	Actinobacteria	Thermoleophilia	Gaiellales	Gaiellaceae
134	B_OTU7854	0.00804338	0.611111	-0.537263	Low pH	Bacteria	Chloroflexi	Thermomicrobia	Ellin6537
135	B_OTU3456	0.053473	1	-0.751587	Low pH	Bacteria	Actinobacteria	Thermoleophilia	Gaiellales	Gaiellaceae
137	B_OTU3289	0.00524471	0.655556	-0.383551	Low pH	Bacteria	Gemmatimonadetes	Gemmatimonadetes	N1423WL
138	B_OTU3988	0.0083653	0.733333	-0.670837	Low pH	Bacteria	Acidobacteria	Solibacteres	Solibacterales	Solibacteraceae
140	B_OTU7836	0.179402	1	-0.660223	Low pH	Bacteria	Actinobacteria	Actinobacteria	Actinomycetales	Nocardioidaceae	Nocardioides
144	B_OTU71667	0.00694937	0.611111	-0.610833	Low pH	Bacteria	Chloroflexi	Ktedonobacteria	TK10
149	B_OTU5541	0.0243551	0.944444	-0.54448	Low pH	Bacteria	Proteobacteria	Gammaproteobacteria	Xanthomonadales	Xanthomonadaceae
150	B_OTU8091	0.00768918	0.8	-0.602589	Low pH	Bacteria	Proteobacteria	Alphaproteobacteria	Caulobacterales	Caulobacteraceae	Phenylobacterium
152	F_OTU3426	0.107268	0.933333	-0.615513	Low pH	Fungi	Ascomycota
153	B_OTU3437	0.0133842	0.688889	-0.450744	Low pH	Bacteria	Proteobacteria	Alphaproteobacteria	Rhodospirillales	Rhodospirillaceae
154	B_OTU1403	0.0990636	0.977778	-0.632764	Low pH	Bacteria	Proteobacteria	Betaproteobacteria	SC-I-84
157	B_OTU7446	0.0351014	0.822222	-0.5159	Low pH	Bacteria	Actinobacteria	Actinobacteria	Actinomycetales	Geodermatophilaceae	Geodermatophilus
158	B_OTU4663	0.037386	0.988889	-0.714008	Low pH	Bacteria	Actinobacteria	Thermoleophilia	Gaiellales	Gaiellaceae
159	B_OTU66768	0.00575918	0.611111	-0.651751	Low pH	Bacteria	Actinobacteria	Acidimicrobiia	Acidimicrobiales	EB1017
160	B_OTU5900	0.00871934	0.777778	-0.563571	Low pH	Bacteria	Acidobacteria	Solibacteres	Solibacterales	Solibacteraceae	Candidatus Solibacter
161	B_OTU5406	0.0144779	0.811111	-0.476898	Low pH	Bacteria	Acidobacteria	Holophagae	Holophagales	Holophagaceae
164	B_OTU6294	0.05032	0.977778	-0.488769	Low pH	Bacteria	Acidobacteria	Solibacteres	Solibacterales	Solibacteraceae	Candidatus Solibacter
165	B_OTU62	0.0160867	0.866667	-0.565556	Low pH	Bacteria	Actinobacteria	Actinobacteria	Actinomycetales	Geodermatophilaceae	Geodermatophilus
169	B_OTU10000	0.01303	0.877778	-0.268837	Low pH	Bacteria	Gemmatimonadetes	Gemmatimonadetes	Ellin5290
171	B_OTU2443	0.0187887	0.911111	-0.685444	Low pH	Bacteria	Proteobacteria	Gammaproteobacteria	Xanthomonadales	Sinobacteraceae
173	B_OTU1665	0.0599075	0.988889	-0.714959	Low pH	Bacteria	Acidobacteria	Acidobacteriia	Acidobacteriales	Acidobacteriaceae
178	B_OTU1513	0.0518964	0.988889	-0.717034	Low pH	Bacteria	Proteobacteria	Alphaproteobacteria	Ellin329
183	B_OTU56284	0.0056622	0.6	-0.683858	Low pH	Bacteria	Proteobacteria	Alphaproteobacteria	Rhodospirillales	Acetobacteraceae
188	B_OTU5064	0.0239047	0.777778	-0.505647	Low pH	Bacteria	Proteobacteria	Alphaproteobacteria	Rhodospirillales	Rhodospirillaceae
189	B_OTU8857	0.0236795	0.744444	-0.50799	Low pH	Bacteria	Actinobacteria	Actinobacteria	Actinomycetales	Intrasporangiaceae	Oryzihumus	leptocrescens
192	B_OTU5209	0.00624162	0.7	-0.624564	Low pH	Bacteria	Planctomycetes	Planctomycetia	Pirellulales	Pirellulaceae
193	B_OTU1132	0.00871921	0.711111	-0.534814	Low pH	Bacteria	Actinobacteria	Acidimicrobiia	Acidimicrobiales
197	B_OTU8024	0.0484536	0.966667	-0.685649	Low pH	Bacteria	Actinobacteria	Actinobacteria	Actinomycetales
202	B_OTU4358	0.0369996	0.944444	-0.681422	Low pH	Bacteria	Proteobacteria	Betaproteobacteria	Burkholderiales	Burkholderiaceae	Burkholderia
204	B_OTU3939	0.0256744	0.944444	-0.64848	Low pH	Bacteria	Acidobacteria	Solibacteres	Solibacterales
205	B_OTU3634	0.0120648	0.844444	-0.711402	Low pH	Bacteria	Actinobacteria	Thermoleophilia	Solirubrobacterales
206	B_OTU4563	0.0110354	0.722222	-0.698502	Low pH	Bacteria	Proteobacteria	Alphaproteobacteria	Rhodospirillales	Acetobacteraceae
214	B_OTU1751	0.030597	0.844444	-0.557911	Low pH	Bacteria	Planctomycetes	Phycisphaerae	WD2101
215	B_OTU60124	0.0109712	0.766667	-0.596282	Low pH	Bacteria	Actinobacteria	Thermoleophilia	Gaiellales	Gaiellaceae
217	B_OTU4551	0.00781757	0.755556	-0.626033	Low pH	Bacteria	Proteobacteria	Alphaproteobacteria	Caulobacterales	Caulobacteraceae
219	F_OTU4448	0.0907627	0.766667	-0.439258	Low pH	Fungi	Ascomycota	Eurotiomycetes	Chaetothyriales	Herpotrichiellaceae
220	B_OTU7137	0.0083973	0.633333	-0.580712	Low pH	Bacteria	Actinobacteria	Actinobacteria	Actinomycetales	Frankiaceae
224	B_OTU57322	0.00482578	0.633333	-0.605031	Low pH	Bacteria	Proteobacteria	Alphaproteobacteria	Rhodospirillales	Rhodospirillaceae
235	B_OTU7622	0.0476492	0.933333	-0.532321	Low pH	Bacteria	Proteobacteria	Betaproteobacteria	SC-I-84
238	B_OTU6429	0.00778589	0.633333	-0.53693	Low pH	Bacteria	Acidobacteria	DA052	Ellin6513
239	B_OTU4231	0.0164082	0.877778	-0.706844	Low pH	Bacteria	Proteobacteria	Betaproteobacteria	Burkholderiales	Burkholderiaceae	Salinispora
248	B_OTU3532	0.0302109	1	-0.548089	Low pH	Bacteria	Proteobacteria	Alphaproteobacteria	Ellin329
249	B_OTU2629	0.0324955	1	-0.600258	Low pH	Bacteria	Proteobacteria	Alphaproteobacteria	Ellin329
253	B_OTU18889	0.006274	0.644444	-0.668481	Low pH	Bacteria	Proteobacteria	Alphaproteobacteria	Rhizobiales	Hyphomicrobiaceae	Rhodoplanes
255	F_OTU2761	0.10479	0.911111	-0.45216	Low pH	Fungi	Ascomycota	Sordariomycetes	Sordariales	Chaetomiaceae
256	B_OTU5967	0.0165371	0.888889	-0.538667	Low pH	Bacteria	Actinobacteria	Thermoleophilia	Solirubrobacterales	Conexibacteraceae	Conexibacter
258	F_OTU4335	0.275345	0.966667	-0.618974	Low pH	Fungi	Ascomycota	Sordariomycetes
259	B_OTU202	0.0104886	0.766667	-0.465379	Low pH	Bacteria	Acidobacteria	Solibacteres	Solibacterales	Solibacteraceae
261	B_OTU1635	0.014735	0.9	-0.439829	Low pH	Bacteria	Actinobacteria	Thermoleophilia	Solirubrobacterales
266	B_OTU2917	0.0197868	0.788889	-0.481868	Low pH	Bacteria	Acidobacteria	Acidobacteriia	Acidobacteriales	Koribacteraceae
270	B_OTU63135	0.0294388	0.866667	-0.482359	Low pH	Bacteria	Proteobacteria	Betaproteobacteria	SC-I-84
273	B_OTU58925	0.00810792	0.655556	-0.738101	Low pH	Bacteria	Proteobacteria	Alphaproteobacteria	Rhodospirillales	Rhodospirillaceae
275	B_OTU2825	0.0256744	0.944444	-0.555809	Low pH	Bacteria	Acidobacteria	Acidobacteriia	Acidobacteriales	Acidobacteriaceae
276	B_OTU73319	0.0238728	0.788889	-0.482598	Low pH	Bacteria	Actinobacteria	Actinobacteria	Actinomycetales
280	F_OTU4001	0.196422	0.977778	-0.2362	Low pH	Fungi	Ascomycota	Sordariomycetes	Sordariales	Lasiosphaeriaceae	unidentified	Lasiosphaeriaceae sp
281	B_OTU2311	0.00900826	0.644444	-0.59957	Low pH	Bacteria	Proteobacteria	Deltaproteobacteria	Syntrophobacterales	Syntrophobacteraceae
282	B_OTU943	0.0182423	0.822222	-0.378927	Low pH	Bacteria	Bacteroidetes	[Saprospirae]	[Saprospirales]	Chitinophagaceae
288	B_OTU3429	0.0277982	0.988889	-0.596101	Low pH	Bacteria	Actinobacteria	Actinobacteria	Actinomycetales	Geodermatophilaceae
290	B_OTU3524	0.00637073	0.611111	-0.606979	Low pH	Bacteria	Actinobacteria	Actinobacteria	Actinomycetales
294	B_OTU543	0.0218134	0.788889	-0.472671	Low pH	Bacteria	Proteobacteria	Alphaproteobacteria	Sphingomonadales	Sphingomonadaceae	Kaistobacter
295	B_OTU2289	0.0111642	0.833333	-0.617125	Low pH	Bacteria	Proteobacteria	Alphaproteobacteria	Rhodospirillales	Rhodospirillaceae
296	B_OTU506	0.00794693	0.655556	-0.493212	Low pH	Bacteria	Gemmatimonadetes	Gemmatimonadetes	Ellin5290
298	B_OTU8316	0.011647	0.744444	-0.621139	Low pH	Bacteria	Actinobacteria	Actinobacteria	Actinomycetales	Frankiaceae
299	B_OTU5940	0.0154113	0.833333	-0.616934	Low pH	Bacteria	Acidobacteria	Acidobacteriia	Acidobacteriales	Koribacteraceae	Candidatus Koribacter
300	F_OTU4254	0.0300179	0.8	-0.522821	Low pH	Fungi	Ascomycota	Eurotiomycetes	Chaetothyriales	Herpotrichiellaceae	Exophiala
301	B_OTU2010	0.0211062	0.744444	-0.490652	Low pH	Bacteria	Acidobacteria	Acidobacteriia	Acidobacteriales	Acidobacteriaceae
310	B_OTU2674	0.0219101	1	-0.403518	Low pH	Bacteria	Proteobacteria	Alphaproteobacteria	Rhodospirillales	Rhodospirillaceae
314	B_OTU1870	0.00723914	0.722222	-0.594823	Low pH	Bacteria	Acidobacteria	Solibacteres	Solibacterales	Solibacteraceae	Candidatus Solibacter
316	B_OTU55397	0.0137702	0.755556	-0.549896	Low pH	Bacteria	Proteobacteria	Alphaproteobacteria	Rhodospirillales	Rhodospirillaceae
318	B_OTU729	0.00958764	0.655556	-0.526099	Low pH	Bacteria	Actinobacteria	Actinobacteria	Actinomycetales	Actinospicaceae
319	B_OTU7846	0.0104886	0.766667	-0.527648	Low pH	Bacteria	Bacteroidetes	Sphingobacteriia	Sphingobacteriales	Sphingobacteriaceae
320	B_OTU7201	0.00595244	0.588889	-0.676911	Low pH	Bacteria	Planctomycetes	Planctomycetia	Gemmatales	Isosphaeraceae
325	B_OTU6400	0.01821	0.766667	-0.48047	Low pH	Bacteria	Actinobacteria	Actinobacteria	Actinomycetales	Pseudonocardiaceae
326	B_OTU1694	0.0189503	0.822222	-0.587479	Low pH	Bacteria	Actinobacteria	Thermoleophilia	Gaiellales	Gaiellaceae
327	B_OTU2101	0.0295993	0.911111	-0.538695	Low pH	Bacteria	Actinobacteria	Thermoleophilia	Gaiellales	Gaiellaceae
329	B_OTU1673	0.0308224	0.866667	-0.444727	Low pH	Bacteria	Proteobacteria	Betaproteobacteria	SC-I-84
330	B_OTU69837	0.00675609	0.744444	-0.475787	Low pH	Bacteria	WPS-2
335	B_OTU5927	0.0358737	0.922222	-0.483424	Low pH	Bacteria	Proteobacteria	Betaproteobacteria	Burkholderiales	Comamonadaceae
336	B_OTU53800	0.0124514	0.677778	-0.574623	Low pH	Bacteria	Gemmatimonadetes	Gemmatimonadetes	Ellin5290
338	B_OTU42301	0.0113247	0.9	-0.516946	Low pH	Bacteria	Proteobacteria	Alphaproteobacteria	Rhizobiales	Hyphomicrobiaceae	Rhodoplanes
344	B_OTU74198	0.0584598	1	-0.4474	Low pH	Bacteria	Chloroflexi	C0119
345	B_OTU66132	0.00907278	0.7	-0.339896	Low pH	Bacteria	Gemmatimonadetes	Gemmatimonadetes	Gemmatimonadales	Ellin5301
346	B_OTU1118	0.0183713	0.822222	-0.42591	Low pH	Bacteria	Proteobacteria	Gammaproteobacteria	Xanthomonadales	Xanthomonadaceae
349	B_OTU53950	0.015604	0.733333	-0.635852	Low pH	Bacteria	Acidobacteria	Acidobacteriia	Acidobacteriales	Acidobacteriaceae
350	B_OTU8261	0.0161193	0.811111	-0.458416	Low pH	Bacteria	Verrucomicrobia	[Spartobacteria]	[Chthoniobacterales]	[Chthoniobacteraceae]	DA101
353	B_OTU10760	0.0205264	0.911111	-0.517751	Low pH	Bacteria	Nitrospirae	Nitrospira	Nitrospirales	Nitrospiraceae
354	B_OTU2919	0.0159252	0.933333	-0.595717	Low pH	Bacteria	Proteobacteria	Alphaproteobacteria	Rhizobiales	Bradyrhizobiaceae	Bradyrhizobium
355	B_OTU4981	0.0517679	1	-0.272339	Low pH	Bacteria	Gemmatimonadetes	Gemmatimonadetes	Gemmatimonadales	Ellin5301
356	B_OTU1642	0.00714209	0.6	-0.404492	Low pH	Bacteria	Verrucomicrobia	[Pedosphaerae]	[Pedosphaerales]
357	B_OTU7947	0.00846142	0.822222	-0.555777	Low pH	Bacteria	Actinobacteria	Thermoleophilia	Solirubrobacterales	Patulibacteraceae
358	B_OTU10417	0.0122904	0.811111	-0.421656	Low pH	Bacteria	Gemmatimonadetes	Gemmatimonadetes	Gemmatimonadales	Ellin5301
360	B_OTU9151	0.0352304	0.877778	-0.400739	Low pH	Bacteria	Proteobacteria	Alphaproteobacteria	Sphingomonadales	Sphingomonadaceae	Kaistobacter
361	B_OTU7568	0.0179207	0.722222	-0.440174	Low pH	Bacteria	Actinobacteria	Thermoleophilia	Solirubrobacterales
362	B_OTU1497	0.00723884	0.611111	-0.507112	Low pH	Bacteria	Proteobacteria	Alphaproteobacteria	Ellin329
365	B_OTU9800	0.026962	0.588889	-0.607873	Low pH	Bacteria	Chloroflexi	Ktedonobacteria	JG30-KF-AS9
368	B_OTU5364	0.00704591	0.6	-0.563886	Low pH	Bacteria	Acidobacteria	Acidobacteriia	Acidobacteriales	Koribacteraceae	Candidatus Koribacter
369	B_OTU7739	0.0197866	1	-0.435083	Low pH	Bacteria	Proteobacteria	Alphaproteobacteria	Caulobacterales	Caulobacteraceae	Phenylobacterium
373	B_OTU66216	0.00466483	0.644444	-0.692403	Low pH	Bacteria	Actinobacteria	Thermoleophilia	Solirubrobacterales
375	B_OTU11188	0.0053085	0.611111	-0.617117	Low pH	Bacteria	Planctomycetes	Planctomycetia	Gemmatales	Isosphaeraceae
377	B_OTU9127	0.00752847	0.766667	-0.56695	Low pH	Bacteria	Gemmatimonadetes	Gemmatimonadetes	Ellin5290
379	B_OTU4422	0.0287955	0.977778	-0.510905	Low pH	Bacteria	Proteobacteria	Alphaproteobacteria	Sphingomonadales	Erythrobacteraceae
386	B_OTU9604	0.110131	1	-0.536915	Low pH	Bacteria	Proteobacteria	Betaproteobacteria	SC-I-84
387	B_OTU61724	0.00624154	0.588889	-0.431673	Low pH	Bacteria	Bacteroidetes	[Saprospirae]	[Saprospirales]	Chitinophagaceae
388	B_OTU4219	0.327628	1	-0.702867	Low pH	Bacteria	Proteobacteria	Betaproteobacteria	SC-I-84
389	B_OTU73597	0.00820428	0.688889	-0.506669	Low pH	Bacteria	Chloroflexi	Thermomicrobia
392	B_OTU8921	0.0229077	0.888889	-0.581849	Low pH	Bacteria	Proteobacteria	Betaproteobacteria	SC-I-84
393	B_OTU3470	0.00601637	0.622222	-0.385184	Low pH	Bacteria	Proteobacteria	Alphaproteobacteria	Rhodospirillales	Rhodospirillaceae
394	B_OTU7075	0.0306293	0.911111	-0.316185	Low pH	Bacteria	Proteobacteria	Alphaproteobacteria	Sphingomonadales	Sphingomonadaceae	Kaistobacter
395	B_OTU9264	0.00633795	0.677778	-0.455809	Low pH	Bacteria	Armatimonadetes	Chthonomonadetes	Chthonomonadales	Chthonomonadaceae
399	B_OTU7017	0.0184674	0.811111	-0.354843	Low pH	Bacteria	Gemmatimonadetes	Gemmatimonadetes	Gemmatimonadales
400	B_OTU6745	0.0335571	0.966667	-0.600906	Low pH	Bacteria	Proteobacteria	Betaproteobacteria	SC-I-84
401	B_OTU7841	0.00807557	0.688889	-0.433802	Low pH	Bacteria	Proteobacteria	Alphaproteobacteria	Ellin329
403	B_OTU946	0.00762534	0.6	-0.476774	Low pH	Bacteria	Proteobacteria	Alphaproteobacteria	Sphingomonadales	Sphingomonadaceae	Sphingomonas	wittichii
407	B_OTU6104	0.00952335	0.722222	-0.564904	Low pH	Bacteria	Acidobacteria	Solibacteres	Solibacterales	Solibacteraceae
409	F_OTU4124	0.100286	1	-0.475502	Low pH	Fungi	Ascomycota	Sordariomycetes	Hypocreales	Hypocreaceae	Hypocrea	Hypocrea virens
411	F_OTU3389	0.0545026	0.922222	-0.477171	Low pH	Fungi	Ascomycota	Eurotiomycetes	Incertae sedis	Incertae sedis	Sarcinomyces	Sarcinomyces petricola
413	B_OTU3717	0.0112283	0.8	-0.454561	Low pH	Bacteria	Bacteroidetes	Sphingobacteriia	Sphingobacteriales	Sphingobacteriaceae
415	B_OTU1719	0.0273152	0.911111	-0.728602	Low pH	Bacteria	Acidobacteria	Solibacteres	Solibacterales	Solibacteraceae
418	B_OTU6589	0.00701382	0.622222	-0.524472	Low pH	Bacteria	Proteobacteria	Alphaproteobacteria	Rhodospirillales	Rhodospirillaceae
422	B_OTU6086	0.0216205	0.922222	-0.710891	Low pH	Bacteria	Proteobacteria	Alphaproteobacteria	Caulobacterales	Caulobacteraceae
426	B_OTU4545	0.0203334	0.977778	-0.595245	Low pH	Bacteria	Proteobacteria	Alphaproteobacteria	Rhodospirillales	Rhodospirillaceae
429	B_OTU32694	0.00360341	0.611111	-0.529089	Low pH	Bacteria	Proteobacteria	Alphaproteobacteria	Rhizobiales	Hyphomicrobiaceae	Rhodoplanes
435	B_OTU6276	0.00775376	0.711111	-0.418863	Low pH	Bacteria	Gemmatimonadetes	Gemmatimonadetes	Gemmatimonadales
437	B_OTU11043	0.066793	0.988889	-0.490254	Low pH	Bacteria	Proteobacteria	Alphaproteobacteria	Sphingomonadales	Sphingomonadaceae	Kaistobacter
439	B_OTU5431	0.0136095	0.888889	-0.579305	Low pH	Bacteria	Acidobacteria	Solibacteres	Solibacterales	Solibacteraceae
444	B_OTU5931	0.0072388	0.677778	-0.401194	Low pH	Bacteria	Acidobacteria	Solibacteres	Solibacterales
447	F_OTU4082	0.0141243	0.711111	-0.305928	Low pH	Fungi	Ascomycota	Sordariomycetes	Sordariales	Chaetomiaceae	Chaetomium	Chaetomium cupreum
453	B_OTU8550	0.00743229	0.722222	-0.523675	Low pH	Bacteria	Gemmatimonadetes	Gemmatimonadetes	Gemmatimonadales	Ellin5301
454	F_OTU4576	0.027895	0.7	-0.380573	Low pH	Fungi	Basidiomycota	Tremellomycetes	Filobasidiales	Filobasidiaceae	Cryptococcus	Cryptococcus terricola
457	B_OTU4513	0.0068209	0.655556	-0.439256	Low pH	Bacteria	Acidobacteria	Acidobacteria-6	iii1-15
461	B_OTU1912	0.00926553	0.733333	-0.697635	Low pH	Bacteria	Planctomycetes	Planctomycetia	Gemmatales	Isosphaeraceae
462	B_OTU2904	0.0756732	1	-0.611728	Low pH	Bacteria	Actinobacteria	Thermoleophilia	Solirubrobacterales
473	B_OTU11307	0.0121938	0.711111	-0.761978	Low pH	Bacteria	Planctomycetes	Planctomycetia	Gemmatales	Isosphaeraceae
475	B_OTU10240	0.012869	0.733333	-0.454007	Low pH	Bacteria	Actinobacteria	Thermoleophilia	Gaiellales	Gaiellaceae
480	B_OTU421	0.00826838	0.8	-0.636321	Low pH	Bacteria	Actinobacteria	Actinobacteria	Actinomycetales	Frankiaceae
481	B_OTU9724	0.0165372	0.877778	-0.513739	Low pH	Bacteria	Gemmatimonadetes	Gemmatimonadetes	Ellin5290
483	B_OTU452	0.00701359	0.777778	-0.483734	Low pH	Bacteria	Proteobacteria	Gammaproteobacteria	Xanthomonadales	Xanthomonadaceae	Thermomonas
484	B_OTU68963	0.00897617	0.8	-0.426719	Low pH	Bacteria	Actinobacteria	Actinobacteria	Actinomycetales	Micromonosporaceae	Dactylosporangium
485	B_OTU3906	0.0140276	0.9	-0.297175	Low pH	Bacteria	Actinobacteria	Acidimicrobiia	Acidimicrobiales	EB1017
491	B_OTU58725	0.0112602	0.711111	-0.480093	Low pH	Bacteria	Gemmatimonadetes	Gemmatimonadetes	Ellin5290
492	B_OTU5634	0.012451	0.622222	-0.35282	Low pH	Bacteria	Actinobacteria	Actinobacteria	Actinomycetales
495	B_OTU264	0.0111001	0.711111	-0.401205	Low pH	Bacteria	Proteobacteria	Gammaproteobacteria	Xanthomonadales	Xanthomonadaceae
498	F_OTU4414	0.0371607	0.744444	-0.515839	Low pH	Fungi	Basidiomycota	Tremellomycetes	Filobasidiales	Filobasidiaceae	Cryptococcus	Cryptococcus friedmannii
499	B_OTU7717	0.011325	0.822222	-0.414666	Low pH	Bacteria	Bacteroidetes	[Saprospirae]	[Saprospirales]	Chitinophagaceae
501	B_OTU5006	0.00794686	0.6	-0.363836	Low pH	Bacteria	Chloroflexi	C0119
506	B_OTU2505	0.0119682	0.711111	-0.69744	Low pH	Bacteria	Proteobacteria	Betaproteobacteria	Burkholderiales	Burkholderiaceae	Burkholderia
510	B_OTU5036	0.0179849	0.777778	-0.425675	Low pH	Bacteria	Acidobacteria	DA052	Ellin6513
511	B_OTU8400	0.00553406	0.611111	-0.475344	Low pH	Bacteria	Proteobacteria	Alphaproteobacteria	Ellin329
515	B_OTU1223	0.0108746	0.755556	-0.603265	Low pH	Bacteria	Acidobacteria	Acidobacteriia	Acidobacteriales	Acidobacteriaceae
521	B_OTU54824	0.0445283	0.822222	-0.422971	Low pH	Bacteria	Chloroflexi	Ktedonobacteria	JG30-KF-AS9
522	B_OTU1561	0.0083	0.733333	-0.677072	Low pH	Bacteria	Proteobacteria	Alphaproteobacteria	Rhodospirillales	Acetobacteraceae
523	B_OTU3967	0.0263504	0.988889	-0.529359	Low pH	Bacteria	Proteobacteria	Gammaproteobacteria	Xanthomonadales	Xanthomonadaceae	Luteibacter	rhizovicinus
526	B_OTU1692	0.0222319	0.966667	-0.265524	Low pH	Bacteria	Actinobacteria	Actinobacteria	Actinomycetales	Micromonosporaceae	Catellatospora
528	B_OTU7665	0.00489061	0.622222	-0.512249	Low pH	Bacteria	Actinobacteria	Thermoleophilia	Gaiellales
529	B_OTU5937	0.00711047	0.711111	-0.461248	Low pH	Bacteria	Proteobacteria	Alphaproteobacteria	Rhodospirillales	Acetobacteraceae
533	B_OTU1399	0.00720679	0.644444	-0.46294	Low pH	Bacteria	Proteobacteria	Alphaproteobacteria	Rhodospirillales	Rhodospirillaceae
536	B_OTU63543	0.00595214	0.666667	-0.494182	Low pH	Bacteria	Proteobacteria	Deltaproteobacteria	Myxococcales
537	F_OTU3505	0.0953313	0.7	-0.235674	Low pH	Fungi	Ascomycota	Sordariomycetes	Sordariales	Chaetomiaceae	Chaetomium	Chaetomium cupreum
547	B_OTU68385	0.0163762	0.8	-0.290106	Low pH	Bacteria	Chloroflexi	Thermomicrobia	JG30-KF-CM45
548	F_OTU4320	0.0165695	0.722222	-0.455086	Low pH	Fungi	Ascomycota	Eurotiomycetes	Eurotiales	Trichocomaceae	Penicillium
551	B_OTU56749	0.00627395	0.633333	-0.304277	Low pH	Bacteria	Gemmatimonadetes	Gemmatimonadetes
554	B_OTU4855	0.0158935	0.822222	-0.59667	Low pH	Bacteria	Proteobacteria	Betaproteobacteria	Burkholderiales	Comamonadaceae
559	B_OTU3696	0.0141882	0.833333	-0.56959	Low pH	Bacteria	Acidobacteria	Acidobacteriia	Acidobacteriales	Acidobacteriaceae
562	B_OTU5203	0.00830057	0.8	-0.567855	Low pH	Bacteria	Proteobacteria	Alphaproteobacteria	Rhodospirillales	Rhodospirillaceae
564	B_OTU5132	0.0221677	0.866667	-0.544146	Low pH	Bacteria	Actinobacteria	Actinobacteria	Actinomycetales
573	B_OTU6595	0.0109712	0.655556	-0.487344	Low pH	Bacteria	Proteobacteria	Betaproteobacteria
577	B_OTU642	0.00859006	0.755556	-0.304976	Low pH	Bacteria	Gemmatimonadetes	Gemmatimonadetes	Gemmatimonadales	Ellin5301
582	B_OTU7295	0.00759246	0.788889	-0.399952	Low pH	Bacteria	Actinobacteria	Acidimicrobiia	Acidimicrobiales	C111
584	F_OTU4118	0.53322	1	-0.284429	Low pH	Fungi	Ascomycota	Eurotiomycetes	Eurotiales	Trichocomaceae	Penicillium	Penicillium sp PSF34
588	B_OTU9585	0.00846127	0.6	-0.433328	Low pH	Bacteria	Proteobacteria	Alphaproteobacteria	Rhizobiales	Methylocystaceae
597	F_OTU2817	0.188218	0.844444	-0.351097	Low pH	Fungi	Ascomycota	Sordariomycetes	Sordariales	Chaetomiaceae	Chaetomium	Chaetomium succineum
602	B_OTU1620	0.0196259	0.744444	-0.414785	Low pH	Bacteria	Acidobacteria	Acidobacteriia	Acidobacteriales	Koribacteraceae	Candidatus Koribacter
608	B_OTU4234	0.0238081	0.988889	-0.354808	Low pH	Bacteria	Actinobacteria	Thermoleophilia	Gaiellales	Gaiellaceae
610	B_OTU7066	0.0236794	0.955556	-0.418371	Low pH	Bacteria	Bacteroidetes	Sphingobacteriia	Sphingobacteriales	Sphingobacteriaceae	Mucilaginibacter	ximonensis
611	B_OTU5538	0.00707841	0.633333	-0.441805	Low pH	Bacteria	Acidobacteria	Acidobacteriia	Acidobacteriales	Koribacteraceae
625	F_OTU2552	0.0539235	0.766667	-0.41589	Low pH	Fungi	Basidiomycota	Tremellomycetes	Tremellales	Incertae sedis	Cryptococcus	Cryptococcus sp VP_2009b
627	F_OTU4343	0.127409	0.588889	-0.286036	Low pH	Fungi	Basidiomycota	Agaricomycetes	Trechisporales	unidentified	unidentified	Trechisporales sp
628	B_OTU8217	0.0077213	0.666667	-0.42518	Low pH	Bacteria	Chloroflexi	C0119
633	F_OTU2655	0.118143	0.644444	-0.303423	Low pH	Fungi	Ascomycota	Sordariomycetes	Sordariales	Lasiosphaeriaceae	Arnium	Arnium gigantosporum
638	B_OTU68358	0.00990953	0.644444	-0.393177	Low pH	Bacteria	Proteobacteria	Gammaproteobacteria	Xanthomonadales	Xanthomonadaceae
641	B_OTU10356	0.013159	0.688889	-0.517466	Low pH	Bacteria	Actinobacteria	Actinobacteria	Actinomycetales	Streptomycetaceae	Streptomyces
647	F_OTU2684	0.0145751	0.633333	-0.379479	Low pH	Fungi
648	B_OTU2859	0.0102626	0.922222	-0.416785	Low pH	Bacteria	Proteobacteria	Alphaproteobacteria	Rhodospirillales	Rhodospirillaceae
649	B_OTU7758	0.0138341	0.944444	-0.512768	Low pH	Bacteria	Actinobacteria	Acidimicrobiia	Acidimicrobiales	EB1017
650	B_OTU3372	0.0793731	0.988889	-0.533456	Low pH	Bacteria	Proteobacteria	Alphaproteobacteria	Rhizobiales	Hyphomicrobiaceae	Rhodoplanes
651	F_OTU3637	0.184968	0.988889	-0.473957	Low pH	Fungi	Ascomycota	Sordariomycetes	Hypocreales	Hypocreaceae	Trichoderma	Trichoderma viride
652	F_OTU4477	0.481419	0.977778	-0.486101	Low pH	Fungi	Basidiomycota	Tremellomycetes	Cystofilobasidiales	Cystofilobasidiaceae	Guehomyces	Guehomyces pullulans
654	F_OTU3963	0.0403139	0.688889	-0.388999	Low pH	Fungi	Ascomycota	Sordariomycetes	Hypocreales	Hypocreaceae	Trichoderma	Trichoderma asperellum
655	F_OTU4551	0.0205589	0.811111	-0.328878	Low pH	Fungi	Ascomycota	Dothideomycetes
656	B_OTU969	0.00781826	0.655556	-0.706653	Low pH	Bacteria	Acidobacteria	Acidobacteriia	Acidobacteriales	Acidobacteriaceae
659	B_OTU69678	0.0106817	0.655556	-0.579053	Low pH	Bacteria	Proteobacteria	Alphaproteobacteria	Rhodospirillales	Acetobacteraceae
660	B_OTU1791	0.0127405	0.866667	-0.323147	Low pH	Bacteria	Planctomycetes	Phycisphaerae	WD2101
662	B_OTU1625	0.0334287	0.988889	-0.481884	Low pH	Bacteria	Actinobacteria	Thermoleophilia	Solirubrobacterales
670	B_OTU7996	0.00923339	0.811111	-0.324474	Low pH	Bacteria	Bacteroidetes	[Saprospirae]	[Saprospirales]	Chitinophagaceae
680	B_OTU6602	0.0229398	0.866667	-0.631877	Low pH	Bacteria	Proteobacteria	Betaproteobacteria	SC-I-84
682	F_OTU2368	0.00672399	0.6	-0.46479	Low pH	Fungi	Ascomycota	Incertae sedis	Incertae sedis	Incertae sedis	Ochroconis	Ochroconis mirabilis
683	B_OTU5760	0.00936253	0.744444	-0.465391	Low pH	Bacteria	Acidobacteria	Solibacteres	Solibacterales	Solibacteraceae	Candidatus Solibacter
684	F_OTU4078	0.246131	0.911111	-0.275951	Low pH	Fungi	Ascomycota	Dothideomycetes	Incertae sedis	Pseudeurotiaceae	Pseudogymnoascus	Pseudogymnoascus roseus
688	B_OTU3835	0.0425016	1	-0.497139	Low pH	Bacteria	Actinobacteria	Actinobacteria	Actinomycetales	Streptomycetaceae	Streptomyces
691	B_OTU65030	0.00489031	0.611111	-0.471702	Low pH	Bacteria	WS3	PRR-12	Sediment-1	PRR-10
695	F_OTU3350	0.0268005	0.644444	-0.41558	Low pH	Fungi	Ascomycota	Dothideomycetes	Capnodiales	Teratosphaeriaceae	Devriesia	Devriesia sp
699	B_OTU808	0.00781775	0.8	-0.360155	Low pH	Bacteria	Actinobacteria	Thermoleophilia	Gaiellales	Gaiellaceae
701	B_OTU2022	0.00865434	0.8	-0.355049	Low pH	Bacteria	Actinobacteria	Acidimicrobiia	Acidimicrobiales	EB1017
704	B_OTU2408	0.0220065	0.888889	-0.250553	Low pH	Bacteria	Proteobacteria	Gammaproteobacteria	Xanthomonadales	Xanthomonadaceae	Luteibacter	rhizovicinus
706	B_OTU1414	0.00810705	0.844444	-0.272285	Low pH	Bacteria	Actinobacteria	Acidimicrobiia	Acidimicrobiales	EB1017
707	B_OTU7464	0.0161833	0.9	-0.399405	Low pH	Bacteria	Proteobacteria	Deltaproteobacteria	Myxococcales	Haliangiaceae
720	F_OTU3074	0.718928	1	-0.438437	Low pH	Fungi	Zygomycota	Incertae sedis	Mortierellales	Mortierellaceae	Mortierella	Mortierella rishikesha
722	B_OTU1021	0.0286025	0.855556	-0.443856	Low pH	Bacteria	Acidobacteria	Acidobacteriia	Acidobacteriales	Acidobacteriaceae
723	B_OTU7844	0.00527631	0.666667	-0.496251	Low pH	Bacteria	Actinobacteria	Thermoleophilia	Gaiellales	Gaiellaceae
730	B_OTU56745	0.00736786	0.633333	-0.235945	Low pH	Bacteria	Proteobacteria	Alphaproteobacteria	Rhodospirillales	Acetobacteraceae
737	F_OTU4413	0.125543	1	-0.300261	Low pH	Fungi	Ascomycota	Sordariomycetes	Coniochaetales	Coniochaetaceae	Coniochaeta	Coniochaeta canina
738	B_OTU63728	0.017213	0.677778	-0.406029	Low pH	Bacteria	Gemmatimonadetes	Gemmatimonadetes
741	B_OTU3846	0.0295034	0.988889	-0.378316	Low pH	Bacteria	Proteobacteria	Alphaproteobacteria	Rhizobiales	Phyllobacteriaceae	Mesorhizobium
744	B_OTU7512	0.00546889	0.644444	-0.314894	Low pH	Bacteria	Actinobacteria	Acidimicrobiia	Acidimicrobiales
745	B_OTU2139	0.0129014	0.788889	-0.355804	Low pH	Bacteria	Actinobacteria	Thermoleophilia	Gaiellales	Gaiellaceae
761	B_OTU3042	0.00611337	0.622222	-0.484313	Low pH	Bacteria	Actinobacteria	Actinobacteria	Actinomycetales	Microbacteriaceae	Rathayibacter
762	B_OTU2256	0.0254814	0.866667	-0.57058	Low pH	Bacteria	Actinobacteria	Thermoleophilia	Gaiellales	Gaiellaceae
763	F_OTU3136	0.0202051	0.655556	-0.362453	Low pH	Fungi	Ascomycota	Leotiomycetes	Helotiales	Helotiaceae	Articulospora	Articulospora proliferata
766	F_OTU2231	0.0106171	0.588889	-0.298711	Low pH	Fungi	Ascomycota	Sordariomycetes	Hypocreales	Clavicipitaceae	Pochonia	Pochonia bulbillosa
768	B_OTU56945	0.0103921	0.633333	-0.684524	Low pH	Bacteria	Chloroflexi	SHA-26
769	F_OTU3395	0.0326884	0.855556	-0.240175	Low pH	Fungi	Ascomycota	Incertae sedis	Incertae sedis	Incertae sedis	Chalara
770	B_OTU8410	0.0128051	0.666667	-0.376338	Low pH	Bacteria	Proteobacteria	Betaproteobacteria	SC-I-84
777	F_OTU4097	0.021878	0.722222	-0.275064	Low pH	Fungi	Ascomycota	Leotiomycetes	Helotiales
779	B_OTU10462	0.00604833	0.622222	-0.320658	Low pH	Bacteria	Acidobacteria	Solibacteres	Solibacterales
781	F_OTU2213	0.0426947	0.866667	-0.323038	Low pH	Fungi	Ascomycota	Sordariomycetes	Chaetosphaeriales	Chaetosphaeriaceae	Chloridium	Chloridium sp GHJ_3
782	B_OTU65810	0.0090731	0.677778	-0.293975	Low pH	Bacteria	Proteobacteria	Gammaproteobacteria	Xanthomonadales	Xanthomonadaceae
783	B_OTU1638	0.0062414	0.6	-0.314963	Low pH	Bacteria	Chloroflexi	Chloroflexi	[Roseiflexales]	[Kouleothrixaceae]
784	B_OTU11111	0.0682088	0.977778	-0.493353	Low pH	Bacteria	Proteobacteria	Alphaproteobacteria	Sphingomonadales	Sphingomonadaceae	Kaistobacter
786	B_OTU3049	0.0298895	1	-0.340341	Low pH	Bacteria	Actinobacteria	Thermoleophilia	Solirubrobacterales
790	B_OTU5673	0.00791445	0.766667	-0.288992	Low pH	Bacteria	Proteobacteria	Alphaproteobacteria	Rhizobiales	Bradyrhizobiaceae	Bradyrhizobium
791	B_OTU8135	0.0245483	0.988889	-0.520694	Low pH	Bacteria	Actinobacteria	Actinobacteria	Actinomycetales	Nocardioidaceae	Nocardioides
798	B_OTU8308	0.00463296	0.644444	-0.489857	Low pH	Bacteria	Verrucomicrobia	[Pedosphaerae]	[Pedosphaerales]	Ellin515
800	B_OTU3776	0.0124827	0.888889	-0.343163	Low pH	Bacteria	Actinobacteria	Actinobacteria	Actinomycetales	Nocardioidaceae
803	B_OTU1980	0.00591976	0.688889	-0.522865	Low pH	Bacteria	Chloroflexi	TK10	B07	FFCH4570
807	B_OTU5248	0.00646633	0.744444	-0.435139	Low pH	Bacteria	Verrucomicrobia	Opitutae	Opitutales	Opitutaceae	Opitutus
830	B_OTU8669	0.011003	0.844444	-0.341115	Low pH	Bacteria	Proteobacteria	Alphaproteobacteria	Sphingomonadales	Sphingomonadaceae	Kaistobacter
837	B_OTU6217	0.0212022	0.777778	-0.221832	Low pH	Bacteria	Proteobacteria	Alphaproteobacteria	Rhodospirillales	Rhodospirillaceae
840	B_OTU4665	0.0304043	1	-0.41235	Low pH	Bacteria	Proteobacteria	Alphaproteobacteria	Rhodospirillales	Rhodospirillaceae
841	B_OTU58817	0.00707853	0.588889	-0.392924	Low pH	Bacteria	Proteobacteria	Gammaproteobacteria	Xanthomonadales	Xanthomonadaceae	Rhodanobacter
843	B_OTU4826	0.0250634	1	-0.228029	Low pH	Bacteria	Proteobacteria	Betaproteobacteria	MND1
846	B_OTU5280	0.00579109	0.666667	-0.284101	Low pH	Bacteria	Acidobacteria	[Chloracidobacteria]	RB41	Ellin6075
849	B_OTU1745	0.00505133	0.644444	-0.397008	Low pH	Bacteria	Proteobacteria	Alphaproteobacteria	Ellin329
851	B_OTU7404	0.00437496	0.644444	-0.411705	Low pH	Bacteria	Actinobacteria	Actinobacteria	Actinomycetales	Micromonosporaceae	Pilimelia
852	B_OTU7427	0.262122	1	-0.241101	Low pH	Bacteria	Proteobacteria	Betaproteobacteria	Burkholderiales	Comamonadaceae
853	B_OTU7924	0.0949133	1	-0.4568	Low pH	Bacteria	Proteobacteria	Alphaproteobacteria	Rhizobiales	Hyphomicrobiaceae	Devosia
855	B_OTU3427	0.00482622	0.655556	-0.409843	Low pH	Bacteria	Proteobacteria	Deltaproteobacteria	Myxococcales
860	B_OTU63931	0.00916925	0.688889	-0.576401	Low pH	Bacteria	Proteobacteria	Betaproteobacteria	Burkholderiales	Comamonadaceae
862	B_OTU69013	0.00463297	0.588889	-0.480257	Low pH	Bacteria	Proteobacteria	Alphaproteobacteria	Rhodospirillales	Rhodospirillaceae
864	B_OTU1654	0.00572713	0.622222	-0.354813	Low pH	Bacteria	Proteobacteria	Deltaproteobacteria	Myxococcales	Haliangiaceae
866	B_OTU2039	0.0126119	0.777778	-0.441476	Low pH	Bacteria	Actinobacteria	Thermoleophilia	Solirubrobacterales
871	F_OTU4337	0.00871943	0.588889	-0.313201	Low pH	Fungi	Ascomycota	Eurotiomycetes	Chaetothyriales	Herpotrichiellaceae	Phialophora	Phialophora hyalina
875	B_OTU5442	0.0167949	0.866667	-0.630455	Low pH	Bacteria	Acidobacteria	Acidobacteriia	Acidobacteriales	Acidobacteriaceae
877	B_OTU7645	0.00640215	0.6	-0.276072	Low pH	Bacteria	Gemmatimonadetes	Gemmatimonadetes	Gemmatimonadales	Ellin5301
887	B_OTU2043	0.0121939	0.722222	-0.368279	Low pH	Bacteria	Proteobacteria	Betaproteobacteria	SC-I-84
890	B_OTU7519	0.0398636	1	-0.458908	Low pH	Bacteria	Actinobacteria	Thermoleophilia	Gaiellales	Gaiellaceae
896	B_OTU8205	0.0886393	1	-0.61202	Low pH	Bacteria	Proteobacteria	Betaproteobacteria	Burkholderiales	Oxalobacteraceae
897	B_OTU5951	0.00489032	0.644444	-0.361049	Low pH	Bacteria	Actinobacteria	Actinobacteria	Actinomycetales	Kineosporiaceae
898	B_OTU10939	0.00727102	0.744444	-0.581151	Low pH	Bacteria	Actinobacteria	Thermoleophilia	Solirubrobacterales	Patulibacteraceae
923	B_OTU6633	0.00508348	0.633333	-0.485241	Low pH	Bacteria	Acidobacteria	Solibacteres	Solibacterales	Solibacteraceae	Candidatus Solibacter
924	B_OTU7214	0.0533765	1	-0.306237	Low pH	Bacteria	Firmicutes	Bacilli	Bacillales	Bacillaceae	Bacillus	flexus
926	F_OTU4447	0.0145746	0.811111	-0.394958	Low pH	Fungi	Ascomycota	Sordariomycetes	Incertae sedis	Annulatascaceae	Conlarium	Conlarium duplumascospora
928	B_OTU10274	0.00678852	0.611111	-0.263509	Low pH	Bacteria	Planctomycetes	Phycisphaerae	WD2101
940	B_OTU7453	0.176217	1	-0.316562	Low pH	Bacteria	Actinobacteria	Actinobacteria	Actinomycetales	Micromonosporaceae
946	B_OTU679	0.0548888	0.977778	-0.259103	Low pH	Bacteria	Chloroflexi	Ellin6529
949	B_OTU8247	0.040732	1	-0.252477	Low pH	Bacteria	Proteobacteria	Betaproteobacteria	Burkholderiales	Comamonadaceae	Methylibium
954	B_OTU72141	0.00958762	0.755556	-0.298588	Low pH	Bacteria	Chloroflexi	Thermomicrobia	JG30-KF-CM45
974	B_OTU6013	0.0123543	0.866667	-0.499755	Low pH	Bacteria	Actinobacteria	Actinobacteria	Actinomycetales	Microbacteriaceae
978	B_OTU7216	0.00878289	0.844444	-0.385056	Low pH	Bacteria	Firmicutes	Bacilli	Bacillales	Paenibacillaceae	Ammoniphilus
985	B_OTU1439	0.00363563	0.611111	-0.51851	Low pH	Bacteria	Proteobacteria	Alphaproteobacteria	Rhizobiales
986	B_OTU62357	0.00601642	0.655556	-0.532598	Low pH	Bacteria	Proteobacteria	Betaproteobacteria	Burkholderiales	Comamonadaceae	Rubrivivax
988	F_OTU3230	0.558895	0.933333	-0.421058	Low pH	Fungi	Ascomycota	Dothideomycetes	Incertae sedis	Pseudeurotiaceae	Pseudogymnoascus	Pseudogymnoascus roseus
989	F_OTU3044	0.0610985	0.966667	-0.361413	Low pH	Fungi	Ascomycota	Sordariomycetes	Hypocreales	Hypocreaceae
990	B_OTU1750	0.010585	0.711111	-0.302615	Low pH	Bacteria	Proteobacteria	Gammaproteobacteria	Xanthomonadales	Xanthomonadaceae
992	B_OTU7455	0.0783115	1	-0.240215	Low pH	Bacteria	Proteobacteria	Betaproteobacteria	Burkholderiales	Oxalobacteraceae	Janthinobacterium
1004	B_OTU1101	0.00572662	0.688889	-0.344699	Low pH	Bacteria	Proteobacteria	Betaproteobacteria	MND1
1005	B_OTU7690	0.0700428	1	-0.354861	Low pH	Bacteria	Actinobacteria	Thermoleophilia	Solirubrobacterales	Patulibacteraceae
1006	B_OTU1398	0.00405393	0.655556	-0.466708	Low pH	Bacteria	Proteobacteria	Betaproteobacteria	SC-I-84
1010	B_OTU7825	0.00482603	0.6	-0.366468	Low pH	Bacteria	Proteobacteria	Alphaproteobacteria	Ellin329
1014	B_OTU4598	0.00688509	0.7	-0.376147	Low pH	Bacteria	Actinobacteria	Actinobacteria	Actinomycetales	Frankiaceae
1016	B_OTU7237	0.00643498	0.766667	-0.644073	Low pH	Bacteria	Actinobacteria	Actinobacteria	Actinomycetales	Frankiaceae
1018	B_OTU3555	0.0148958	0.966667	-0.385983	Low pH	Bacteria	Proteobacteria	Gammaproteobacteria	Xanthomonadales	Sinobacteraceae
1025	B_OTU190	0.00395757	0.622222	-0.566677	Low pH	Bacteria	Acidobacteria	Acidobacteriia	Acidobacteriales	Acidobacteriaceae	Edaphobacter
1029	B_OTU7452	0.136257	1	-0.242984	Low pH	Bacteria	Proteobacteria	Betaproteobacteria	Burkholderiales	Comamonadaceae	Methylibium
1030	F_OTU4055	0.52434	1	-0.465356	Low pH	Fungi	Basidiomycota	Tremellomycetes	Tremellales	Incertae sedis	Cryptococcus	Cryptococcus aerius
1031	F_OTU4799	0.00443983	0.711111	-0.40462	Low pH	Fungi	Basidiomycota	Tremellomycetes	Tremellales	Incertae sedis	Cryptococcus	Cryptococcus aerius
1033	B_OTU3718	0.121972	1	-0.666162	Low pH	Bacteria	Acidobacteria	Acidobacteriia	Acidobacteriales	Acidobacteriaceae
1035	B_OTU7288	0.00678834	0.833333	-0.343041	Low pH	Bacteria	Actinobacteria	Actinobacteria	Actinomycetales	Nocardioidaceae
1036	B_OTU930	0.00897631	0.777778	-0.286023	Low pH	Bacteria	Proteobacteria	Gammaproteobacteria	Xanthomonadales	Xanthomonadaceae	Thermomonas
1052	B_OTU6947	0.0173735	0.955556	-0.222516	Low pH	Bacteria	Firmicutes	Bacilli	Bacillales	Bacillaceae	Bacillus	flexus
1057	B_OTU5901	0.00376426	0.611111	-0.412986	Low pH	Bacteria	Proteobacteria	Gammaproteobacteria	Xanthomonadales	Xanthomonadaceae	Rhodanobacter
1058	B_OTU8328	0.00756114	0.688889	-0.323914	Low pH	Bacteria	Gemmatimonadetes	Gemmatimonadetes	Ellin5290
1065	B_OTU75	0.0271546	0.933333	-0.286122	Low pH	Bacteria	Actinobacteria	Actinobacteria	Actinomycetales	Intrasporangiaceae	Terracoccus
1075	B_OTU53481	0.00891194	0.744444	-0.341201	Low pH	Bacteria	Proteobacteria	Betaproteobacteria	SC-I-84
1094	F_OTU4109	0.0100699	0.755556	-0.268886	Low pH	Fungi	Ascomycota	Sordariomycetes
1099	B_OTU6411	0.00572676	0.744444	-0.345521	Low pH	Bacteria	Acidobacteria	Acidobacteriia	Acidobacteriales	Koribacteraceae	Candidatus Koribacter
1111	B_OTU6966	0.0350374	1	-0.294679	Low pH	Bacteria	Actinobacteria	Actinobacteria	Actinomycetales	Micromonosporaceae
1113	B_OTU9732	0.0131903	0.677778	-0.247296	Low pH	Bacteria	Proteobacteria	Gammaproteobacteria	Xanthomonadales	Xanthomonadaceae	Rhodanobacter
1116	B_OTU6000	0.00537281	0.788889	-0.424234	Low pH	Bacteria	Acidobacteria	Solibacteres	Solibacterales	Solibacteraceae	Candidatus Solibacter
1123	B_OTU67110	0.00765683	0.822222	-0.261691	Low pH	Bacteria	Firmicutes	Bacilli	Bacillales	Bacillaceae	Bacillus	flexus
1124	B_OTU7135	0.00762462	0.866667	-0.359444	Low pH	Bacteria	Proteobacteria	Alphaproteobacteria	Rhizobiales
1125	B_OTU4092	0.0210413	0.977778	-0.51259	Low pH	Bacteria	Proteobacteria	Deltaproteobacteria	Myxococcales
1128	B_OTU7558	0.0114855	0.955556	-0.392067	Low pH	Bacteria	Actinobacteria	Acidimicrobiia	Acidimicrobiales
1130	B_OTU5172	0.00575867	0.788889	-0.34193	Low pH	Bacteria	Proteobacteria	Alphaproteobacteria	Rhizobiales	Hyphomicrobiaceae	Hyphomicrobium
1133	B_OTU5963	0.00318564	0.588889	-0.380387	Low pH	Bacteria	Acidobacteria	Solibacteres	Solibacterales	Solibacteraceae	Candidatus Solibacter
1137	B_OTU8334	0.0136735	0.877778	-0.334486	Low pH	Bacteria	Proteobacteria	Alphaproteobacteria	Sphingomonadales	Sphingomonadaceae	Sphingomonas
1139	F_OTU3859	0.0200121	0.855556	-0.22427	Low pH	Fungi	Ascomycota	Leotiomycetes	Helotiales
1152	B_OTU4148	0.0211057	0.988889	-0.370506	Low pH	Bacteria	Actinobacteria	Acidimicrobiia	Acidimicrobiales	EB1017
1165	F_OTU3392	0.0303719	0.733333	-0.391164	Low pH	Fungi	Ascomycota	Eurotiomycetes	Eurotiales	Trichocomaceae	Penicillium	Penicillium sp ASR
1176	B_OTU7140	0.0271224	0.977778	-0.233123	Low pH	Bacteria	Proteobacteria	Alphaproteobacteria	Caulobacterales	Caulobacteraceae	Caulobacter
1177	B_OTU2123	0.0102951	0.833333	-0.267026	Low pH	Bacteria	WS3	PRR-12	Sediment-1
1185	B_OTU7903	0.00337768	0.6	-0.525199	Low pH	Bacteria	Proteobacteria	Alphaproteobacteria	Caulobacterales	Caulobacteraceae	Phenylobacterium
1194	B_OTU5072	0.0337503	1	-0.583066	Low pH	Bacteria	Actinobacteria	Actinobacteria	Actinomycetales	Microbacteriaceae	Cryocola
1200	B_OTU6125	0.0174701	0.966667	-0.456639	Low pH	Bacteria	Proteobacteria	Betaproteobacteria	Burkholderiales	Oxalobacteraceae	Ralstonia
1201	F_OTU3089	0.00900863	0.677778	-0.496837	Low pH	Fungi	Ascomycota	Eurotiomycetes	Eurotiales	Trichocomaceae	Phialosimplex	Phialosimplex caninus
1205	B_OTU73557	0.00408596	0.644444	-0.496886	Low pH	Bacteria	Proteobacteria	Betaproteobacteria	SC-I-84
1212	B_OTU8115	0.0254169	0.977778	-0.35799	Low pH	Bacteria	Firmicutes	Bacilli	Bacillales	Alicyclobacillaceae	Alicyclobacillus
1221	B_OTU404	0.00534052	0.666667	-0.314288	Low pH	Bacteria	Nitrospirae	Nitrospira	Nitrospirales	Nitrospiraceae	Nitrospira
1224	B_OTU975	0.0075285	0.722222	-0.437863	Low pH	Bacteria	Acidobacteria	Acidobacteriia	Acidobacteriales	Acidobacteriaceae	Edaphobacter
1234	B_OTU5778	0.0143171	0.877778	-0.406089	Low pH	Bacteria	Nitrospirae	Nitrospira	Nitrospirales	Nitrospiraceae	Nitrospira
1238	F_OTU3034	0.0493869	0.977778	-0.249488	Low pH	Fungi	Ascomycota	Eurotiomycetes	Eurotiales	Trichocomaceae	Aspergillus	Aspergillus tubingensis
1239	B_OTU1258	0.0144461	0.811111	-0.525114	Low pH	Bacteria	Proteobacteria	Gammaproteobacteria	Xanthomonadales	Xanthomonadaceae	Rhodanobacter
1245	B_OTU55363	0.004086	0.611111	-0.482365	Low pH	Bacteria	Proteobacteria	Deltaproteobacteria	Myxococcales
1249	B_OTU1407	0.0135129	0.822222	-0.689335	Low pH	Bacteria	Chloroflexi	Thermomicrobia
1250	F_OTU2239	0.326598	0.911111	-0.465725	Low pH	Fungi	Ascomycota	Dothideomycetes	Incertae sedis	Pseudeurotiaceae	Pseudogymnoascus	Pseudogymnoascus roseus
1251	B_OTU3742	0.542421	1	-0.549903	Low pH	Bacteria	Proteobacteria	Gammaproteobacteria	Xanthomonadales	Xanthomonadaceae	Rhodanobacter
1253	B_OTU5557	0.126733	1	-0.46265	Low pH	Bacteria	Proteobacteria	Alphaproteobacteria	Sphingomonadales	Sphingomonadaceae	Kaistobacter
1254	B_OTU6025	0.277887	1	-0.453271	Low pH	Bacteria	Proteobacteria	Gammaproteobacteria	Xanthomonadales	Xanthomonadaceae
1263	F_OTU3750	0.0618378	0.877778	-0.242313	Low pH	Fungi	Ascomycota	Eurotiomycetes	Eurotiales	Trichocomaceae	Talaromyces	Talaromyces aurantiacus
1264	B_OTU460	0.00546965	0.6	-0.379065	Low pH	Bacteria	Actinobacteria	Thermoleophilia	Solirubrobacterales
1268	B_OTU4388	0.025385	0.933333	-0.559419	Low pH	Bacteria	Proteobacteria	Alphaproteobacteria	Ellin329
1269	B_OTU2529	0.0194648	0.855556	-0.43506	Low pH	Bacteria	Actinobacteria	Actinobacteria	Actinomycetales	Frankiaceae
1280	B_OTU3350	0.0103596	0.733333	-0.423872	Low pH	Bacteria	Bacteroidetes	[Saprospirae]	[Saprospirales]	Chitinophagaceae
1282	B_OTU6037	0.00813993	0.722222	-0.65509	Low pH	Bacteria	Acidobacteria	Acidobacteriia	Acidobacteriales	Koribacteraceae
1284	B_OTU5808	0.240082	1	-0.404401	Low pH	Bacteria	Proteobacteria	Betaproteobacteria	Ellin6067
1285	B_OTU2409	0.0174057	0.744444	-0.520543	Low pH	Bacteria	Acidobacteria	Acidobacteriia	Acidobacteriales	Koribacteraceae	Candidatus Koribacter
1286	B_OTU55811	0.0187895	0.766667	-0.51044	Low pH	Bacteria	Gemmatimonadetes	Gemmatimonadetes	N1423WL
1292	B_OTU1073	0.0250953	0.933333	-0.737767	Low pH	Bacteria	Proteobacteria	Alphaproteobacteria	Ellin329
1295	F_OTU4689	0.0323988	0.8	-0.352222	Low pH	Fungi	Ascomycota	Dothideomycetes	Pleosporales	Montagnulaceae
1296	B_OTU8690	0.00978059	0.744444	-0.443361	Low pH	Bacteria	Proteobacteria	Gammaproteobacteria	Xanthomonadales	Xanthomonadaceae
1299	F_OTU3483	0.00469653	0.588889	-0.234056	Low pH	Fungi	Ascomycota	Leotiomycetes	Helotiales	Incertae sedis	Xylogone	Xylogone sp
1301	B_OTU60072	0.0139308	0.711111	-0.328459	Low pH	Bacteria	Proteobacteria	Gammaproteobacteria	Xanthomonadales	Xanthomonadaceae
1303	B_OTU1899	0.0375148	0.811111	-0.352613	Low pH	Bacteria	Proteobacteria	Betaproteobacteria	SC-I-84
1306	B_OTU8868	0.0203013	0.833333	-0.428697	Low pH	Bacteria	Proteobacteria	Gammaproteobacteria	Xanthomonadales	Xanthomonadaceae
1308	B_OTU3677	0.0295998	0.855556	-0.427664	Low pH	Bacteria	Gemmatimonadetes	Gemmatimonadetes	Ellin5290
1309	F_OTU4722	0.0617095	0.933333	-0.491524	Low pH	Fungi	Ascomycota	Eurotiomycetes	Eurotiales	Trichocomaceae	Penicillium	Penicillium pimiteouiense
1312	B_OTU4309	0.0240018	0.966667	-0.376768	Low pH	Bacteria	Actinobacteria	Thermoleophilia	Gaiellales	Gaiellaceae
1313	B_OTU64014	0.0561114	0.744444	-0.551818	Low pH	Bacteria	Chloroflexi	Ktedonobacteria	JG30-KF-AS9
1314	B_OTU70836	0.0252243	0.711111	-0.526997	Low pH	Bacteria	Proteobacteria	Gammaproteobacteria	Xanthomonadales	Xanthomonadaceae
1317	B_OTU286	0.486117	1	-0.418783	Low pH	Bacteria	Proteobacteria	Gammaproteobacteria	Xanthomonadales	Xanthomonadaceae
1318	B_OTU6041	0.116277	0.977778	-0.523086	Low pH	Bacteria	Proteobacteria	Gammaproteobacteria	Xanthomonadales	Xanthomonadaceae
1319	B_OTU5865	0.164505	1	-0.476237	Low pH	Bacteria	Proteobacteria	Gammaproteobacteria	Xanthomonadales	Xanthomonadaceae	Dyella
1320	B_OTU65391	0.0508348	0.9	-0.528916	Low pH	Bacteria	Bacteroidetes	[Saprospirae]	[Saprospirales]	Chitinophagaceae
80	B_OTU7698	0.393938	1	0	Others	Bacteria	Actinobacteria	Actinobacteria	Actinomycetales	Nocardioidaceae
187	B_OTU8221	0.177922	1	0	Others	Bacteria	Actinobacteria	Actinobacteria	Actinomycetales	Streptomycetaceae
231	F_OTU2378	0.0144139	0.777778	0	Others	Fungi	Ascomycota	Sordariomycetes	Microascales	Microascaceae	unidentified	Microascaceae sp
271	B_OTU5742	0.126637	1	0	Others	Bacteria	Actinobacteria	Actinobacteria	Actinomycetales	Intrasporangiaceae	Phycicoccus
321	B_OTU231	0.02561	0.922222	0	Others	Bacteria	Planctomycetes	Phycisphaerae	WD2101
322	F_OTU4334	0.142659	0.988889	0	Others	Fungi	Ascomycota	Sordariomycetes	Microascales	Microascaceae	Kernia	Kernia sp
340	F_OTU3688	0.0991279	0.944444	0	Others	Fungi	Ascomycota	Eurotiomycetes	Eurotiales	Trichocomaceae
376	F_OTU3642	0.0129016	0.666667	0	Others	Fungi	Ascomycota	Dothideomycetes	Pleosporales
380	B_OTU7704	0.01554	0.9	0	Others	Bacteria	Bacteroidetes	[Saprospirae]	[Saprospirales]	Chitinophagaceae	Flavisolibacter
384	B_OTU54852	0.0134804	0.711111	0	Others	Bacteria	Gemmatimonadetes	Gemmatimonadetes
419	B_OTU7767	0.0135448	0.922222	0	Others	Bacteria	Actinobacteria	Actinobacteria	Actinomycetales	Nocardioidaceae
421	F_OTU3709	0.028409	0.966667	0	Others	Fungi	Ascomycota	Sordariomycetes	Hypocreales	Incertae sedis	Acremonium	Acremonium dichromosporum
423	F_OTU4197	0.0560471	0.988889	0	Others	Fungi	Ascomycota	Sordariomycetes	Coniochaetales	Coniochaetaceae	Lecythophora	Lecythophora sp
424	B_OTU5816	0.00595208	0.588889	0	Others	Bacteria	Proteobacteria	Deltaproteobacteria	Myxococcales
442	F_OTU4212	0.0895402	1	0	Others	Fungi	Ascomycota	Sordariomycetes	Hypocreales	Bionectriaceae	Clonostachys	Clonostachys rosea f. catenulata
449	F_OTU3673	0.0697208	0.977778	0	Others	Fungi	Ascomycota	Sordariomycetes	Xylariales	Incertae sedis	Microdochium	Microdochium bolleyi
451	F_OTU4035	0.0129338	0.6	0	Others	Fungi	Ascomycota	Sordariomycetes	Microascales	Halosphaeriaceae	unidentified	Halosphaeriaceae sp
455	B_OTU2671	0.0204622	0.955556	0	Others	Bacteria	Actinobacteria	Actinobacteria	Actinomycetales	Streptosporangiaceae	Streptosporangium
466	B_OTU8004	0.0329137	0.977778	0	Others	Bacteria	Bacteroidetes	[Saprospirae]	[Saprospirales]	Chitinophagaceae	Flavisolibacter
488	B_OTU7847	0.0126761	0.888889	0	Others	Bacteria	Bacteroidetes	[Saprospirae]	[Saprospirales]	Chitinophagaceae	Flavisolibacter
489	B_OTU8465	0.0356486	0.955556	0	Others	Bacteria	Actinobacteria	Thermoleophilia	Solirubrobacterales
490	F_OTU3858	0.209774	0.933333	0	Others	Fungi	Ascomycota	Sordariomycetes	Sordariales	Lasiosphaeriaceae	unidentified	Lasiosphaeriaceae sp
496	F_OTU3438	0.00981287	0.711111	0	Others	Fungi	Ascomycota	Sordariomycetes	Hypocreales	Nectriaceae	Fusicolla	Fusicolla acetilerea
505	F_OTU2413	0.768251	1	0	Others	Fungi	Ascomycota	Sordariomycetes	Hypocreales	Nectriaceae	Haematonectria	Haematonectria haematococca
543	B_OTU7835	0.0685949	1	0	Others	Bacteria	Actinobacteria	Actinobacteria	Actinomycetales	Nocardioidaceae
561	F_OTU3119	0.268556	0.922222	0	Others	Fungi	Ascomycota	Dothideomycetes	Capnodiales	Davidiellaceae	Cladosporium	Cladosporium sp 4 MU_2012
563	B_OTU7081	0.031723	0.933333	0	Others	Bacteria	Actinobacteria	Actinobacteria	Actinomycetales	Pseudonocardiaceae	Amycolatopsis
574	B_OTU7590	0.00723845	0.633333	0	Others	Bacteria	Actinobacteria	Actinobacteria	Actinomycetales	Nakamurellaceae
579	F_OTU3874	0.0371609	0.811111	0	Others	Fungi	Ascomycota	Sordariomycetes	Hypocreales	Incertae sedis	Myrothecium	Myrothecium sp HZ_6
596	B_OTU5118	0.0385445	0.933333	0	Others	Bacteria	Actinobacteria	Rubrobacteria	Rubrobacterales	Rubrobacteraceae	Rubrobacter
603	B_OTU5527	0.104051	1	0	Others	Bacteria	Gemmatimonadetes	Gemm-1
604	F_OTU4085	0.060326	0.933333	0	Others	Fungi	Ascomycota	Sordariomycetes	Hypocreales	Incertae sedis	Acremonium	Acremonium sp R8_9
621	B_OTU3457	0.235546	1	0	Others	Bacteria	Actinobacteria	Thermoleophilia	Gaiellales	Gaiellaceae
629	B_OTU6808	0.00752864	0.688889	0	Others	Bacteria	Gemmatimonadetes	Gemm-1
635	B_OTU1418	0.0108424	0.688889	0	Others	Bacteria	Proteobacteria	Betaproteobacteria	SC-I-84
639	F_OTU3084	0.0594573	0.855556	0	Others	Fungi	Basidiomycota	Tremellomycetes	Filobasidiales	Filobasidiaceae	Cryptococcus	Cryptococcus terrestris
645	B_OTU5643	0.0120646	0.911111	0	Others	Bacteria	Bacteroidetes	[Saprospirae]	[Saprospirales]	Chitinophagaceae	Niastella
646	F_OTU2722	0.106882	0.977778	0	Others	Fungi	Ascomycota	Sordariomycetes	Sordariales	Lasiosphaeriaceae	unidentified	Lasiosphaeriaceae sp
653	B_OTU1908	0.0112283	0.711111	0	Others	Bacteria	Gemmatimonadetes	Gemmatimonadetes	Ellin5290
665	B_OTU5869	0.024806	0.966667	0	Others	Bacteria	Chloroflexi	Thermomicrobia	JG30-KF-CM45
673	B_OTU6532	0.0267361	1	0	Others	Bacteria	Actinobacteria	Thermoleophilia	Gaiellales	Gaiellaceae
678	F_OTU3945	0.0198832	0.933333	0	Others	Fungi	Ascomycota	Sordariomycetes	Hypocreales	Incertae sedis	Acremonium	Acremonium sp R8_9
687	B_OTU7467	0.177311	1	0	Others	Bacteria	Proteobacteria	Gammaproteobacteria	Xanthomonadales	Xanthomonadaceae
689	F_OTU2815	0.0105526	0.766667	0	Others	Fungi	Ascomycota	Sordariomycetes	Hypocreales	Incertae sedis
690	F_OTU3659	0.0452041	0.788889	0	Others	Fungi	Ascomycota	Eurotiomycetes	Chaetothyriales	Herpotrichiellaceae	Exophiala
692	F_OTU2744	0.159583	0.811111	0	Others	Fungi	Ascomycota	Sordariomycetes	Sordariales	Lasiosphaeriaceae	Apodus	Apodus sp
697	F_OTU2812	0.0204625	0.777778	0	Others	Fungi	Ascomycota	Sordariomycetes	Microascales	Microascaceae	Scedosporium	Scedosporium prolificans
712	B_OTU73852	0.00524402	0.688889	0	Others	Bacteria	Acidobacteria	[Chloracidobacteria]	RB41	Ellin6075
721	B_OTU8063	0.0808854	1	0	Others	Bacteria	Firmicutes	Bacilli	Bacillales	Planococcaceae	Sporosarcina
726	B_OTU2389	0.0625784	1	0	Others	Bacteria	Actinobacteria	Thermoleophilia	Gaiellales	Gaiellaceae
732	B_OTU7091	0.0238084	1	0	Others	Bacteria	Firmicutes	Bacilli	Bacillales	Bacillaceae	Bacillus	cereus
733	F_OTU3692	0.0281518	0.777778	0	Others	Fungi	Ascomycota	Dothideomycetes	Pleosporales	Phaeosphaeriaceae	unidentified	Phaeosphaeriaceae sp
752	F_OTU4004	0.0220065	0.788889	0	Others	Fungi	Ascomycota	Leotiomycetes	Helotiales	Incertae sedis	Scytalidium	Scytalidium circinatum
753	F_OTU3812	0.0322057	0.966667	0	Others	Fungi	Ascomycota	Sordariomycetes
759	B_OTU9682	0.00701339	0.788889	0	Others	Bacteria	Gemmatimonadetes	Gemmatimonadetes	Gemmatimonadales
760	B_OTU4524	0.0117111	0.777778	0	Others	Bacteria	Actinobacteria	Actinobacteria	Actinomycetales	Promicromonosporaceae	Xylanimicrobium
767	B_OTU3368	0.121939	1	0	Others	Bacteria	Gemmatimonadetes	Gemm-1
771	B_OTU5293	0.0201729	0.888889	0	Others	Bacteria	Proteobacteria	Betaproteobacteria	SC-I-84
774	F_OTU2309	0.0184356	0.755556	0	Others	Fungi	Ascomycota	Sordariomycetes	Sordariales	Chaetomiaceae	Chaetomium
775	B_OTU522	0.0397027	1	0	Others	Bacteria	Chloroflexi	TK10	AKYG885	Dolo
776	B_OTU565	0.0175342	0.922222	0	Others	Bacteria	Gemmatimonadetes	Gemmatimonadetes	Gemmatimonadales	Ellin5301
780	B_OTU2321	0.00868647	0.711111	0	Others	Bacteria	Planctomycetes	Phycisphaerae	WD2101
789	B_OTU4676	0.0374824	1	0	Others	Bacteria	Proteobacteria	Gammaproteobacteria	Xanthomonadales	Xanthomonadaceae	Pseudoxanthomonas	mexicana
794	F_OTU3898	0.303176	0.888889	0	Others	Fungi	Ascomycota	Sordariomycetes	Sordariales	Lasiosphaeriaceae
813	F_OTU2579	0.0118077	0.766667	0	Others	Fungi	Ascomycota	Sordariomycetes	Hypocreales	Incertae sedis	Acremonium	Acremonium sp R8_9
815	F_OTU4223	0.0168912	0.822222	0	Others	Fungi	Ascomycota	Sordariomycetes	Incertae sedis	Glomerellaceae	Colletotrichum	Colletotrichum chlorophyti
817	B_OTU7911	0.188861	1	0	Others	Bacteria	Firmicutes	Bacilli	Bacillales	Planococcaceae	Paenisporosarcina
819	B_OTU4254	0.227374	1	0	Others	Bacteria	Proteobacteria	Gammaproteobacteria	Xanthomonadales	Xanthomonadaceae	Luteimonas
824	F_OTU2277	0.140182	0.911111	0	Others	Fungi	Ascomycota	Dothideomycetes	Capnodiales	Davidiellaceae	Cladosporium	Cladosporium sp 4 MU_2012
829	B_OTU6083	0.0563367	1	0	Others	Bacteria	Proteobacteria	Gammaproteobacteria	Xanthomonadales	Xanthomonadaceae	Thermomonas
836	F_OTU3616	0.0497408	0.9	0	Others	Fungi	Ascomycota	Sordariomycetes	Hypocreales	Nectriaceae	Fusarium	Fusarium nelsonii
838	B_OTU430	0.0138986	0.944444	0	Others	Bacteria	Firmicutes	Bacilli	Bacillales	Bacillaceae	Bacillus
850	F_OTU3161	0.0380616	0.888889	0	Others	Fungi	Ascomycota	Dothideomycetes	Pleosporales	Phaeosphaeriaceae	unidentified	Phaeosphaeriaceae sp
867	B_OTU41717	0.109617	1	0	Others	Bacteria	Proteobacteria	Betaproteobacteria	Burkholderiales	Comamonadaceae	Methylibium
869	B_OTU5804	0.0535696	1	0	Others	Bacteria	Acidobacteria	[Chloracidobacteria]	RB41
873	F_OTU4536	0.0478747	0.911111	0	Others	Fungi	Ascomycota	Sordariomycetes	Sordariales	Lasiosphaeriaceae	Zopfiella	Zopfiella sp
879	F_OTU4487	0.0118718	0.733333	0	Others	Fungi	Ascomycota	Dothideomycetes	Pleosporales	Phaeosphaeriaceae	Ophiosphaerella	Ophiosphaerella sp
880	B_OTU8303	0.090602	1	0	Others	Bacteria	Proteobacteria	Betaproteobacteria	Burkholderiales	Comamonadaceae	Variovorax	paradoxus
883	B_OTU2525	0.0755124	1	0	Others	Bacteria	Proteobacteria	Alphaproteobacteria	Caulobacterales	Caulobacteraceae	Phenylobacterium
886	F_OTU2464	0.203307	0.966667	0	Others	Fungi	Ascomycota	Sordariomycetes	Sordariales	Sordariaceae	unidentified	Sordariaceae sp
889	B_OTU7834	0.187027	1	0	Others	Bacteria	Proteobacteria	Betaproteobacteria	Burkholderiales	Oxalobacteraceae	Janthinobacterium
895	F_OTU4170	0.0183709	0.877778	0	Others	Fungi	Ascomycota	Sordariomycetes	Hypocreales	Nectriaceae	Haematonectria	Haematonectria haematococca
902	B_OTU5103	0.00823595	0.744444	0	Others	Bacteria	Proteobacteria	Deltaproteobacteria	Desulfuromonadales	Geobacteraceae	Geobacter
911	B_OTU1332	0.006949	0.744444	0	Others	Bacteria	Proteobacteria	Alphaproteobacteria	Rhizobiales	Hyphomicrobiaceae
912	B_OTU3487	0.0178559	0.955556	0	Others	Bacteria	Actinobacteria	Actinobacteria	Actinomycetales	Kineosporiaceae
913	F_OTU2274	0.0388981	0.988889	0	Others	Fungi	Ascomycota	Dothideomycetes	Pleosporales	Incertae sedis	Periconia	Periconia igniaria
914	B_OTU929	0.0166009	0.933333	0	Others	Bacteria	Proteobacteria	Gammaproteobacteria	Xanthomonadales	Xanthomonadaceae	Pseudoxanthomonas
932	B_OTU6122	0.0243553	0.966667	0	Others	Bacteria	Proteobacteria	Betaproteobacteria	Burkholderiales	Oxalobacteraceae
934	B_OTU5789	0.390946	1	0	Others	Bacteria	Proteobacteria	Gammaproteobacteria	Xanthomonadales	Xanthomonadaceae	Thermomonas
936	F_OTU4234	0.127184	1	0	Others	Fungi	Ascomycota	Sordariomycetes	Hypocreales	Nectriaceae	Fusarium	Fusarium proliferatum
941	B_OTU8230	0.0324957	0.988889	0	Others	Bacteria	Proteobacteria	Betaproteobacteria	Burkholderiales	Comamonadaceae
945	B_OTU7845	0.1804	1	0	Others	Bacteria	Actinobacteria	Actinobacteria	Actinomycetales	Streptomycetaceae	Streptomyces	mirabilis
947	B_OTU6586	0.0065635	0.766667	0	Others	Bacteria	Proteobacteria	Alphaproteobacteria	Sphingomonadales	Sphingomonadaceae	Novosphingobium
950	B_OTU10828	0.00884726	0.811111	0	Others	Bacteria	Gemmatimonadetes	Gemmatimonadetes	Ellin5290
952	B_OTU8052	0.00961938	0.944444	0	Others	Bacteria	Actinobacteria	Actinobacteria	Actinomycetales	Micrococcaceae
953	B_OTU7189	0.0103596	0.822222	0	Others	Bacteria	Proteobacteria	Gammaproteobacteria	Pseudomonadales	Pseudomonadaceae	Pseudomonas	viridiflava
957	F_OTU4530	0.00611304	0.611111	0	Others	Fungi	Ascomycota	Sordariomycetes	Hypocreales	Incertae sedis	Myrothecium	Myrothecium carmichaelii
960	B_OTU8649	0.0121288	0.866667	0	Others	Bacteria	Proteobacteria	Alphaproteobacteria	Rhodospirillales	Rhodospirillaceae
961	B_OTU9598	0.0117108	0.866667	0	Others	Bacteria	Actinobacteria	Thermoleophilia	Gaiellales	Gaiellaceae
962	F_OTU4637	0.0342652	0.933333	0	Others	Fungi	Ascomycota	Leotiomycetes	Helotiales	Helotiaceae	Articulospora	Articulospora proliferata
970	B_OTU7430	0.0327853	1	0	Others	Bacteria	Actinobacteria	Actinobacteria	Actinomycetales
977	F_OTU3534	0.00694948	0.622222	0	Others	Fungi	Ascomycota	Dothideomycetes	Pleosporales
981	B_OTU3386	0.00543732	0.633333	0	Others	Bacteria	Gemmatimonadetes	Gemmatimonadetes	Gemmatimonadales	Ellin5301
991	B_OTU7770	0.00968411	0.722222	0	Others	Bacteria	Firmicutes	Bacilli	Bacillales	Planococcaceae	Sporosarcina
995	F_OTU3157	0.0064343	0.722222	0	Others	Fungi	Ascomycota	Sordariomycetes	Trichosphaeriales	Incertae sedis	unidentified	Trichosphaeriales sp
998	B_OTU6279	0.0187892	0.988889	0	Others	Bacteria	Firmicutes	Bacilli	Bacillales	Bacillaceae	Bacillus	selenatarsenatis
1002	F_OTU3475	0.236125	0.977778	0	Others	Fungi	Ascomycota	Sordariomycetes	Sordariales	Lasiosphaeriaceae
1011	B_OTU8536	0.0612272	0.866667	0	Others	Bacteria	Proteobacteria	Gammaproteobacteria	Xanthomonadales	Xanthomonadaceae
1020	F_OTU2589	0.0132548	0.833333	0	Others	Fungi	Ascomycota	Sordariomycetes	Diaporthales	Togniniaceae	Phaeoacremonium	Phaeoacremonium hungaricum
1026	B_OTU3005	0.0618706	1	0	Others	Bacteria	Proteobacteria	Deltaproteobacteria	Myxococcales	Haliangiaceae
1032	B_OTU7980	0.00907279	0.7	0	Others	Bacteria	Gemmatimonadetes	Gemmatimonadetes	Gemmatimonadales
1034	F_OTU4726	0.0478101	0.977778	0	Others	Fungi	Zygomycota	Incertae sedis	Mucorales	Rhizopodaceae	Rhizopus	Rhizopus arrhizus var. arrhizus
1038	B_OTU1553	0.0385122	1	0	Others	Bacteria	Gemmatimonadetes	Gemmatimonadetes	N1423WL
1039	F_OTU2513	0.12609	0.922222	0	Others	Fungi	Ascomycota	Sordariomycetes	Incertae sedis	Incertae sedis	Myrmecridium	Myrmecridium schulzeri
1040	F_OTU4548	0.0332993	0.9	0	Others	Fungi	Ascomycota	Dothideomycetes	Pleosporales	Cucurbitariaceae	Pyrenochaetopsis	Pyrenochaetopsis leptospora
1041	F_OTU3465	0.0874165	0.9	0	Others	Fungi	Ascomycota	Sordariomycetes	Sordariales	Lasiosphaeriaceae	Schizothecium	Schizothecium carpinicola
1042	F_OTU4420	0.0930471	0.911111	0	Others	Fungi	Ascomycota	Leotiomycetes	Helotiales	Incertae sedis	Tetracladium	Tetracladium maxilliforme
1043	B_OTU7098	0.00727105	0.777778	0	Others	Bacteria	Gemmatimonadetes	Gemmatimonadetes	N1423WL
1044	B_OTU6915	0.0162475	0.844444	0	Others	Bacteria	Gemmatimonadetes	Gemmatimonadetes
1050	F_OTU4424	0.0568836	0.911111	0	Others	Fungi	Ascomycota	Leotiomycetes
1051	B_OTU7153	0.00688489	0.722222	0	Others	Bacteria	Actinobacteria	Actinobacteria	Actinomycetales	Nakamurellaceae
1056	B_OTU8017	0.0303075	0.977778	0	Others	Bacteria	Proteobacteria	Betaproteobacteria	Burkholderiales	Oxalobacteraceae	Janthinobacterium
1059	B_OTU51225	0.00334595	0.588889	0	Others	Bacteria	Proteobacteria	Alphaproteobacteria	Rhizobiales	Hyphomicrobiaceae	Rhodoplanes
1060	B_OTU61684	0.00739916	0.722222	0	Others	Bacteria	Firmicutes	Bacilli	Bacillales	Planococcaceae	Sporosarcina
1062	B_OTU7921	0.164184	1	0	Others	Bacteria	Proteobacteria	Gammaproteobacteria	Xanthomonadales	Xanthomonadaceae	Luteimonas
1068	F_OTU4429	0.00669149	0.633333	0	Others	Fungi	Basidiomycota	Tremellomycetes	Tremellales	Incertae sedis	Cryptococcus
1069	B_OTU1390	0.00524434	0.666667	0	Others	Bacteria	Gemmatimonadetes	Gemmatimonadetes	Gemmatimonadales	Ellin5301
1071	F_OTU3916	0.0161833	0.755556	0	Others	Fungi	Ascomycota	Sordariomycetes	Incertae sedis	Plectosphaerellaceae	Lectera	Lectera longa
1073	B_OTU7497	0.0204622	0.955556	0	Others	Bacteria	Bacteroidetes	Sphingobacteriia	Sphingobacteriales	Sphingobacteriaceae	Pedobacter
1074	B_OTU5296	0.0170838	0.933333	0	Others	Bacteria	Bacteroidetes	[Saprospirae]	[Saprospirales]	Chitinophagaceae	Chitinophaga
1080	B_OTU8056	0.0781185	1	0	Others	Bacteria	Actinobacteria	Actinobacteria	Actinomycetales	Streptomycetaceae	Streptomyces
1085	B_OTU5898	0.0107133	0.866667	0	Others	Bacteria	Actinobacteria	Actinobacteria	Actinomycetales	Micrococcaceae
1087	B_OTU5503	0.0258354	1	0	Others	Bacteria	Acidobacteria	Acidobacteria-6	iii1-15
1089	B_OTU6004	0.0069492	0.755556	0	Others	Bacteria	Proteobacteria	Gammaproteobacteria	Xanthomonadales	Xanthomonadaceae
1090	B_OTU71470	0.00910542	0.711111	0	Others	Bacteria	Actinobacteria	Actinobacteria	Actinomycetales
1092	F_OTU3835	0.0134485	0.866667	0	Others	Fungi	Ascomycota	Sordariomycetes	Microascales	Microascaceae	unidentified	Microascaceae sp
1093	B_OTU7459	0.0188858	0.966667	0	Others	Bacteria	Proteobacteria	Betaproteobacteria	Burkholderiales	Comamonadaceae	Methylibium
1095	B_OTU5854	0.0136093	0.933333	0	Others	Bacteria	Actinobacteria	Actinobacteria	Actinomycetales	Geodermatophilaceae	Modestobacter
1096	B_OTU5003	0.00321711	0.588889	0	Others	Bacteria	Proteobacteria	Betaproteobacteria	Burkholderiales	Oxalobacteraceae	Janthinobacterium
1097	F_OTU4415	0.0347796	0.966667	0	Others	Fungi	Ascomycota	Eurotiomycetes	Chaetothyriales	Chaetothyriaceae	Cyphellophora	Cyphellophora laciniata
1103	F_OTU2333	0.0500945	0.9	0	Others	Fungi	Ascomycota	Dothideomycetes	Incertae sedis	Myxotrichaceae	Oidiodendron	Oidiodendron truncatum
1105	B_OTU66020	0.0120646	0.955556	0	Others	Bacteria	WS3	PRR-12	Sediment-1
1110	B_OTU10059	0.00752812	0.655556	0	Others	Bacteria	Gemmatimonadetes	Gemm-5
1112	B_OTU5070	0.0258677	1	0	Others	Bacteria	Actinobacteria	Thermoleophilia	Gaiellales	Gaiellaceae
1115	B_OTU4632	0.0175663	0.988889	0	Others	Bacteria	Actinobacteria	Acidimicrobiia	Acidimicrobiales
1126	B_OTU628	0.00453582	0.666667	0	Others	Bacteria	Proteobacteria	Alphaproteobacteria	Sphingomonadales	Sphingomonadaceae	Kaistobacter
1132	F_OTU3055	0.0375469	0.8	0	Others	Fungi	Ascomycota	Eurotiomycetes	Eurotiales	Trichocomaceae	Talaromyces	Talaromyces marneffei
1138	B_OTU4781	0.0119035	0.866667	0	Others	Bacteria	Proteobacteria	Alphaproteobacteria	Sphingomonadales	Sphingomonadaceae	Sphingomonas
1148	B_OTU2839	0.0129014	0.966667	0	Others	Bacteria	Proteobacteria	Gammaproteobacteria	Xanthomonadales	Xanthomonadaceae
1149	B_OTU5413	0.0113893	0.777778	0	Others	Bacteria	Acidobacteria	[Chloracidobacteria]	44524
1156	B_OTU8059	0.0297929	0.977778	0	Others	Bacteria	Proteobacteria	Gammaproteobacteria	Xanthomonadales	Xanthomonadaceae	Stenotrophomonas
1157	B_OTU7001	0.0115819	0.888889	0	Others	Bacteria	Proteobacteria	Gammaproteobacteria	Xanthomonadales	Xanthomonadaceae
1158	B_OTU1376	0.0156682	0.977778	0	Others	Bacteria	Chloroflexi	Ellin6529
1162	B_OTU7612	0.0132231	0.855556	0	Others	Bacteria	Proteobacteria	Alphaproteobacteria	Caulobacterales	Caulobacteraceae	Phenylobacterium
1166	B_OTU9627	0.0065952	0.733333	0	Others	Bacteria	Proteobacteria	Alphaproteobacteria	Sphingomonadales	Sphingomonadaceae	Kaistobacter
1167	B_OTU7790	0.072681	1	0	Others	Bacteria	Proteobacteria	Deltaproteobacteria	Myxococcales
1169	F_OTU2324	0.023197	0.888889	0	Others	Fungi	Ascomycota	Sordariomycetes	Sordariales	Lasiosphaeriaceae
1170	B_OTU1197	0.00707774	0.766667	0	Others	Bacteria	Proteobacteria	Gammaproteobacteria	Xanthomonadales	Xanthomonadaceae
1171	B_OTU537	0.00279924	0.588889	0	Others	Bacteria	Proteobacteria	Alphaproteobacteria	Rhodospirillales	Acetobacteraceae	Roseomonas
1172	B_OTU9774	0.0036679	0.622222	0	Others	Bacteria	Firmicutes	Bacilli	Bacillales	Alicyclobacillaceae	Alicyclobacillus
1179	B_OTU5700	0.0166015	0.955556	0	Others	Bacteria	Proteobacteria	Betaproteobacteria
1188	F_OTU3734	0.0426946	0.888889	0	Others	Fungi	Ascomycota	Eurotiomycetes	Eurotiales	Trichocomaceae	Aspergillus	Aspergillus flavus
1199	B_OTU534	0.016183	0.911111	0	Others	Bacteria	Gemmatimonadetes	Gemmatimonadetes	Gemmatimonadales	Ellin5301
1203	F_OTU2183	0.0353268	0.977778	0	Others	Fungi	Ascomycota	Eurotiomycetes	Eurotiales	Trichocomaceae	Penicillium	Penicillium sp KF
1204	F_OTU2521	0.0401528	0.888889	0	Others	Fungi	Ascomycota
1209	B_OTU3620	0.0110674	0.811111	0	Others	Bacteria	Proteobacteria	Betaproteobacteria	MND1
1215	B_OTU6559	0.0268329	0.988889	0	Others	Bacteria	Proteobacteria	Gammaproteobacteria	Xanthomonadales	Xanthomonadaceae	Arenimonas
1220	F_OTU2433	0.0258995	0.944444	0	Others	Fungi	Ascomycota	Sordariomycetes	Hypocreales	Incertae sedis	Gliomastix	Gliomastix tumulicola
1225	F_OTU4719	0.0111321	0.677778	0	Others	Fungi	Ascomycota	Dothideomycetes	Pleosporales	Incertae sedis	Periconia	Periconia sp
1228	B_OTU3273	0.00633841	0.655556	0	Others	Bacteria	Firmicutes	Bacilli	Turicibacterales	Turicibacteraceae	Turicibacter
1230	F_OTU2278	0.00926592	0.755556	0	Others	Fungi	Ascomycota	Sordariomycetes	Sordariales	Chaetomiaceae	Chaetomium
1248	B_OTU7401	0.00521183	0.588889	0	Others	Bacteria	Cyanobacteria	Chloroplast	Stramenopiles
1305	F_OTU3536	0.932596	0.988889	0	Others	Fungi	Ascomycota	Sordariomycetes	Sordariales	Chaetomiaceae	Chaetomium
1307	F_OTU3244	0.0175991	0.633333	0	Others	Fungi	Ascomycota	Eurotiomycetes	Eurotiales	Trichocomaceae	unidentified	Trichocomaceae sp
