# Supplementary material for: Soil Microbial Network Complexity Varies With pH as a Continuum, Not a Threshold, Across the North China Plain
Source: Frontiers journal article supplement (doi:10.3389/fmicb.2022.895687), 2022-06-06
Supplement: Table_2.xlsx [file Table_2.xlsx]

## Sheet: site
Table S1 The distribution of plots in each sample site and soil pH values of samples.
Site	Plot	Longitude (°E)	Latitude (°N)	pH	Site	Plot	Longitude (°E)	Latitude (°N)	pH	Site	Plot	Longitude (°E)	Latitude (°N)	pH
CX	CX1	115.69	34.8	8.35	LB	LB1	111.86	32.53	4.76	SZ	SZ1	117.29	33.62	7.41
	CX2	115.68	34.74	8.43		LB2	111.86	32.56	4.57		SZ2	117.23	33.55	8.21
	CX3	115.77	34.74	7.86		LB3	111.94	32.58	4.58		SZ3	117.28	33.56	8.12
DC	DC1	115.28	33.65	8.24		LB4	111.9	32.54	4.83	TC	TC1	118.38	34.78	5.56
	DC2	115.32	33.65	6.89		LB5	111.93	32.55	5		TC2	118.44	34.77	6
	DC3	115.35	33.65	7.76	LX	LX1	116.65	37.27	8.61		TC3	118.38	34.75	5.55
	DC4	115.32	33.63	7.98		LX2	116.7	37.3	8.79		TC4	118.4	34.75	5.56
	DC5	115.35	33.63	6.75	PD	PD1	119.98	36.69	4.65		TC5	118.45	34.75	6.83
DM	DM1	115.08	36.3	8.39		PD2	120.01	36.69	5.56	TH	TH1	115.51	33.25	8.05
	DM2	115.05	36.29	8.52		PD3	120.01	36.66	7.09		TH2	115.57	33.26	8.01
	DM3	115.01	36.24	8.4		PD4	119.98	36.66	4.73		TH3	115.56	33.22	8.14
	DM4	115.06	36.23	8.18		PD5	119.94	36.67	4.91	TZ	TZ1	116.98	35.06	5.96
DZ	DZ1	115.05	38.44	8.27		PD6	119.97	36.63	4.92		TZ2	117.07	35.07	5.78
	DZ2	115.08	38.44	8.44		PD7	120	36.63	5.49		TZ3	117	35.04	7.23
	DZ3	115.01	38.39	7.88	SC	SC1	114.21	33.37	6.39		TZ4	117.04	35.04	6.03
FP	FP1	109.27	34.75	8.37		SC2	114.21	33.39	6.29		TZ5	117.07	35.04	5.74
GM	GM1	119.67	36.4	8.76		SC3	114.27	33.43	6.6		TZ6	117	35.01	6.91
	GM2	119.62	36.37	8.48		SC4	114.23	33.43	6.34		TZ7	117.04	35	5.89
GY	GY1	116.11	33.48	7.97	SQ	SQ1	112.89	32.88	5.67		TZ8	117.07	35	5.87
	GY2	116.15	33.48	7.74		SQ2	112.9	32.89	5.58	XC	XC1	115.01	32.83	4.81
	GY3	116.18	33.47	7.44		SQ3	112.9	32.9	4.78		XC2	115.06	32.83	4.88
	GY4	116.14	33.44	7.69		SQ4	112.9	32.9	5.53		XC3	115.1	32.82	5.25
	GY5	116.17	33.44	7.98		SQ5	112.91	32.9	5.24		XC4	115.11	32.79	4.64
	GY6	116.09	33.41	7.43		SQ6	112.9	32.91	5.15	YC	YC1	115.91	35.64	8.32
	GY7	116.13	33.41	7.77		SQ7	112.89	32.91	6.15		YC2	115.87	35.66	8.19
	GY8	116.16	33.41	7.8		SQ8	112.89	32.88	6.02		YC3	115.94	35.64	8.72
HD	HD1	111.59	36.12	7.99		SQ9	112.88	32.88	5.39		YC4	115.95	35.69	8.22
	HD2	111.61	36.14	7.85	YJ	YJ1	114.29	35.18	8.33	ZX	ZX1	114.87	37.82	8.2
	HD3	111.63	36.13	8.08		YJ2	114.22	35.18	8.31	XY	XY1	113.4	34.86	8
QH	QH1	116.69	36.71	8.1	ZC	ZC1	115.5	34.06	8.29		XY2	113.37	34.83	8.66
